# Supplementary material for: Mitochondrial O-GlcNAc Transferase Interacts with and Modifies Many Proteins and Its Up-Regulation Affects Mitochondrial Function and Cellular Energy Homeostasis
Source: MDPI journal article supplement (doi:10.3390/cancers13122956), 2021-06-12
Supplement: s1 [file s1]

# Mitochondrial O-GlcNAc Transferase Interacts with and Modifies Many Proteins and Its Up-Regulation Affects Mitochondrial Function and Cellular Energy Homeostasis

Paweł Józwiak, Piotr Ciesielski, Piotr K. Zakrzewski, Karolina Kozal, Joanna Oracz, Grażyna Budryn, Dorota Żyżelewicz, Stéphanie Flament, Anne-Sophie Vercoutter-Edouart, Fabrice Bray, Tony Lefebvre and Anna Krześlak

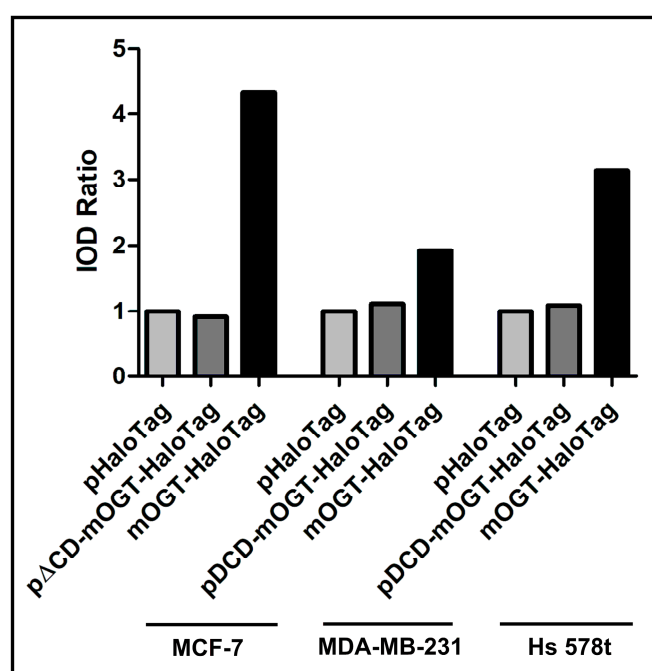

**Figure S1.** Densitometric analysis of O-GlcNAc levels in mitochondria-enriched fraction from Western blots presented on Figure 2B. The analysis was performed using GelPro Analyzes ver. 3.1 software (Media Cybernetics). IOD; integrated optical density.

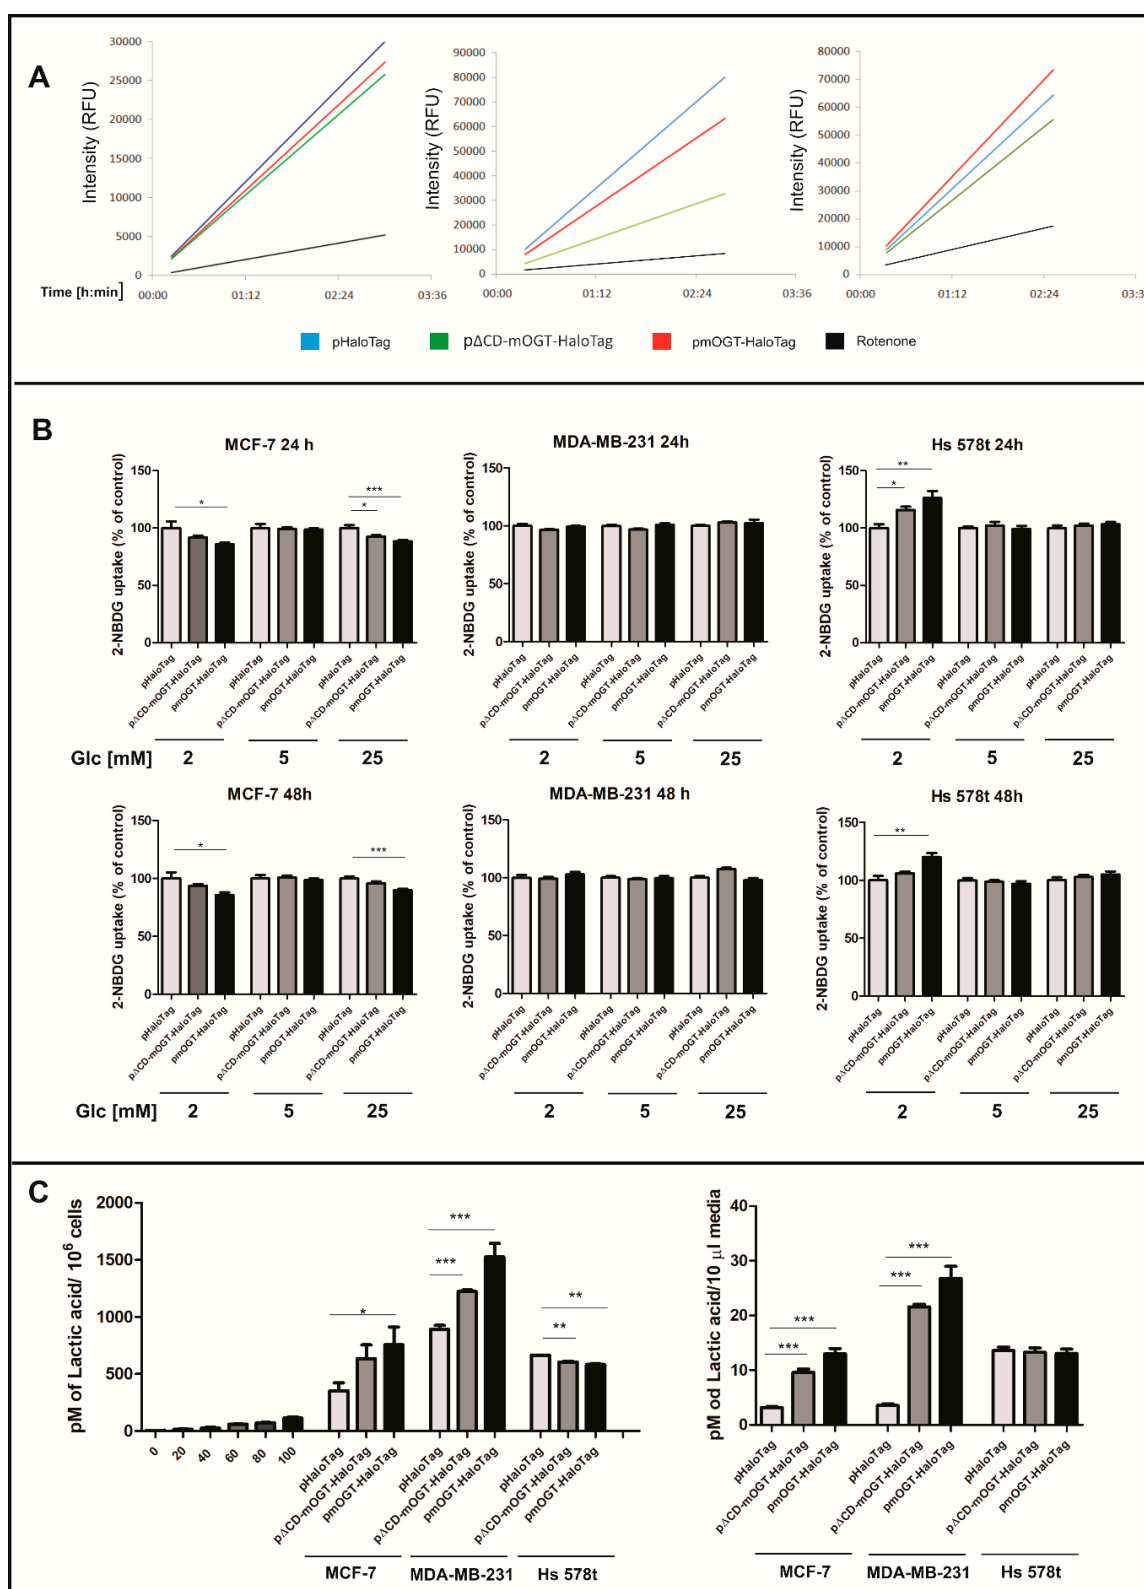

**Figure S2.** mOGT up-regulation alter cellular respiration and glycolytic activity. **(A)** Mitochondrial respiration in cells transfected for 48 h with HaloTag (blue line) or mOGT-HaloTag (red line). The graph is showing oxygen depletion in the living cells media as an increase in phosphorescence signal intensity of Extracellular O<sub>2</sub> Consumption Reagent over time. **(B)** Glucose uptake by cells Table 2. NBDG incorporation into living cells. The results are presented as median fluorescence signal of 2-NBDG detected using flow cytometry. **(C)** Intracellular (a) and post-culture media (b) Fluorometric detection of L-(+)-lactic acid concentration in cells treated for 48 h with plasmid DNA. Data represent the average of at least 3 independent experiments performed in tetraplicates. \* indicates significance  $p < 0,05$ ; \*\*  $p < 0,01$ ; \*\*\*  $p < 0,001$ ; Rotenone; an inhibitor of complex I of the mitochondrial respiratory chain.

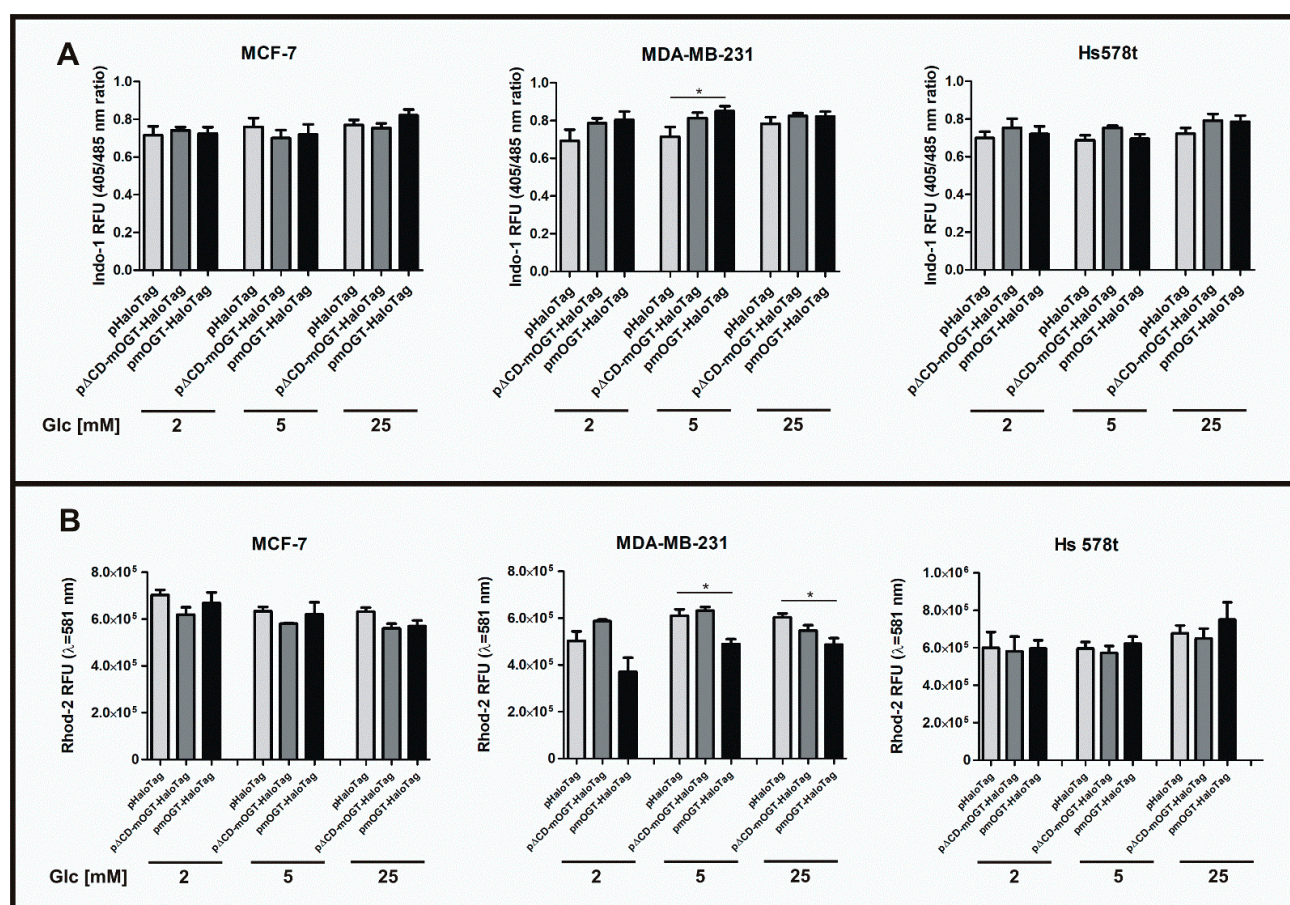

**Figure S3.** Intracellular and mitochondrial calcium levels in breast cancer cells with up-regulated mOGT. (A)  $\text{Ca}^{2+}$  release into the cytosol determined by measuring the ratio between  $\text{Ca}^{2+}$ -bound Indo signal (at 405 nm) and  $\text{Ca}^{2+}$ -unbound Indo signal (at 480 nm) (B) mitochondrial  $\text{Ca}^{2+}$  calcium level measured by Rhod-2 indicator which accumulates in mitochondria. \* indicates significance  $p < 0,05$ . Glc; Glucose.

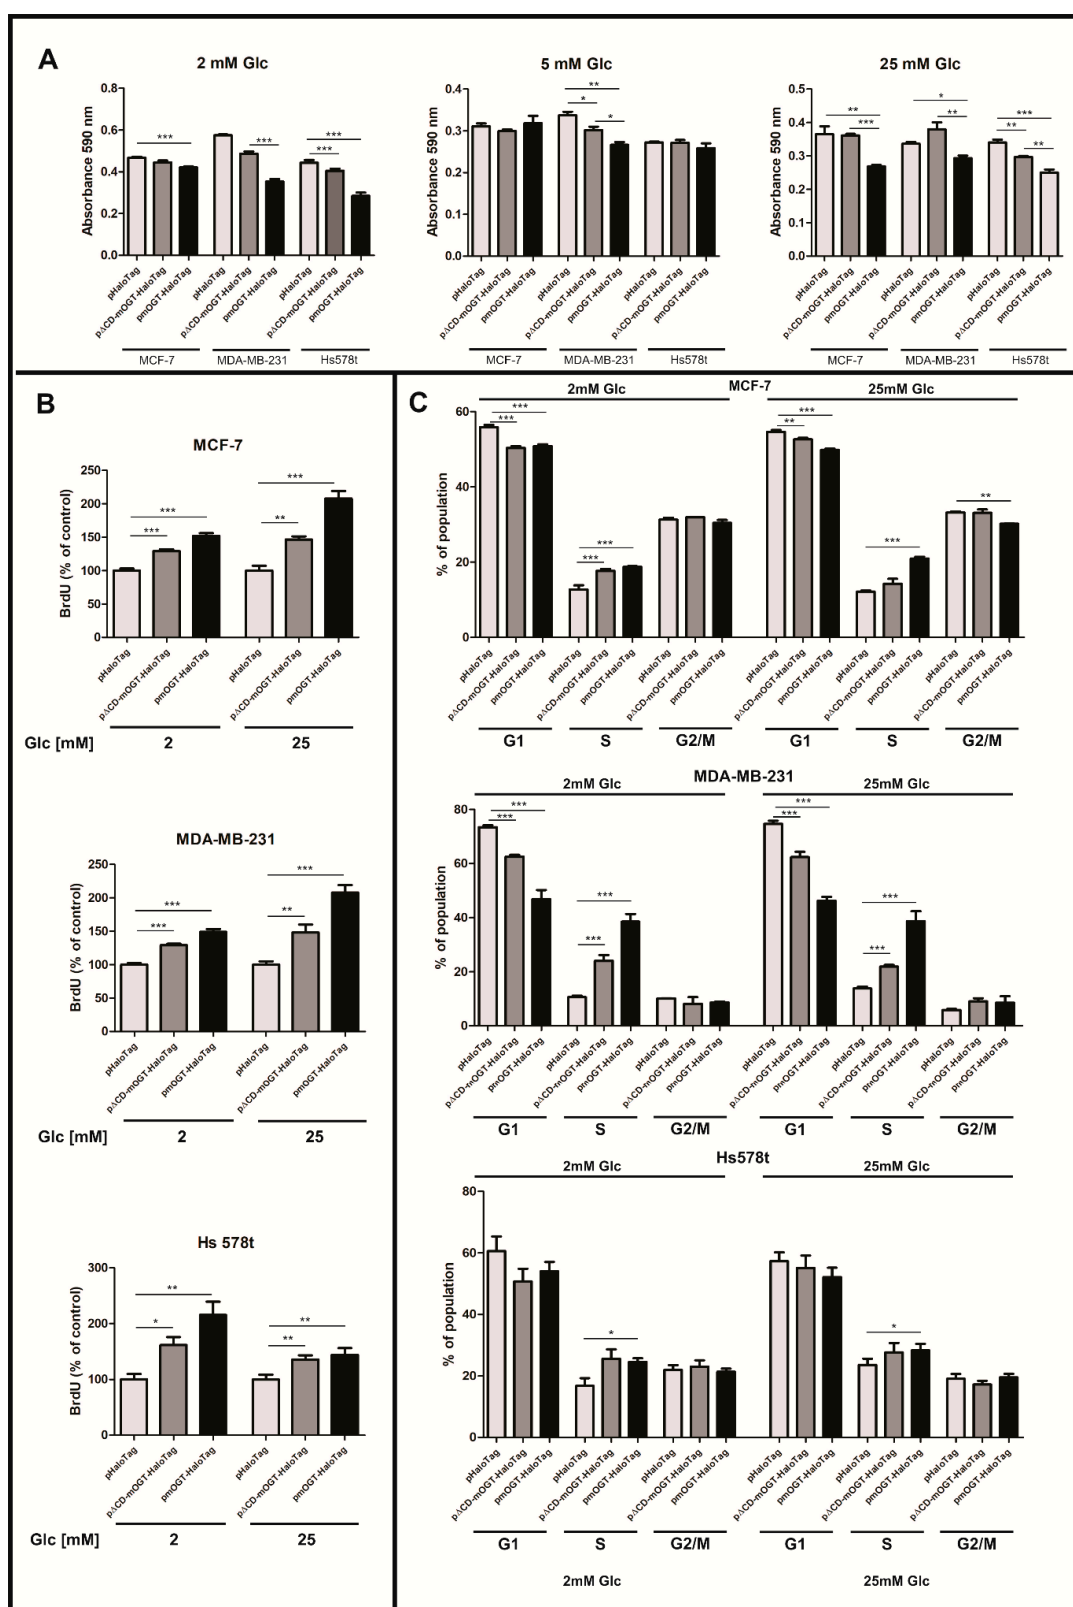

**Figure S4.** mOGT treated cells lose the viability and change their cell cycle. Cells were growing in different glucose conditions and treated for 48 h with plasmid DNA. (A) Viability of cells determined by MTT assay, (B) Proliferation of cells measured based on BrdU incorporation into DNA (C) Cell population in G1, S and G2/M cell cycle phases assessed by labeling cells with propidium iodide. Data represent the average of at least 3 independent experiments performed in tetraplicates and are expressed as means  $\pm$  SD (bar graphs shown in A) or median  $\pm$  S.E. (bar graphs shown in B and C). \* indicates significance  $p < 0,05$ ; \*\*  $p < 0,01$ ; \*\*\*  $p < 0,001$ . Glc; Glucose.
