# Supplementary material for: Mitochondrial O-GlcNAc Transferase Interacts with and Modifies Many Proteins and Its Up-Regulation Affects Mitochondrial Function and Cellular Energy Homeostasis
Source: Cancers (Basel). 2021 Jun 12;13(12):2956. doi: 10.3390/cancers13122956 (PMC8231590; doi:10.3390/cancers13122956)
Supplement: Supplementary file 1 [file cancers-13-02956-s001.zip]

Archive with 9 entries (9 files):
- File S1. The original western blot figures.pdf
- File S2. Supplementary Methods.pdf
- Supplementary Figures S1.-S4..pdf
- Table S1. mOGT Interactors.xls
- Table S2. O-GlcNAcylated candidates.xls
- Table S3. Both method per cell line.xls
- Table S4. Gold list .xls
- Table S5. Nuclear candidates.xls
- Table S6. All mitochondrial Candidates.xls
