# Supplementary material for: Mitochondrial O-GlcNAc Transferase Interacts with and Modifies Many Proteins and Its Up-Regulation Affects Mitochondrial Function and Cellular Energy Homeostasis
Source: Cancers (Basel). 2021 Jun 12;13(12):2956. doi: 10.3390/cancers13122956 (PMC8231590; doi:10.3390/cancers13122956)
Supplement: Supplementary file 1 [file cancers-13-02956-s001.zip › Table S1. mOGT Interactors.xls]

## Sheet: Arkusz1
				MCF-7			MDA-MB-231			Hs578t
Number	Gene	Accession Number	Protein name	Peptides	Unique peptides	Coverage (%)	Peptides	Unique peptides	Coverage (%)	Peptides	Unique peptides	Coverage (%)	Processes/Function
1	AK2	P54819	Adenylate kinase 2, mitochondrial OS=Homo sapiens GN=AK2 PE=1 SV=2	9	6	24	22	12	22	28	1	12	ATP, AMP metabolic, ADP biosynthesis
2	NDUFA10	O95299-2	Isoform 2 of NADH dehydrogenase [ubiquinone] 1 alpha subcomplex subunit 10, mitochondrial OS=Homo sapiens GN=NDUFA10	4	4	9	8	4	8	32	1	8	Electron transport; Respiratory Chain
3	MRPL14	Q6P1L8	39S ribosomal protein L14, mitochondrial OS=Homo sapiens GN=MRPL14 PE=1 SV=1	5	4	25	15	4	15	-	-	-	translation
4	MSRB2	Q9Y3D2	Methionine-R-sulfoxide reductase B2, mitochondrial OS=Homo sapiens GN=MSRB2 PE=1 SV=2	5	4	20	18	11	10	10	4	16	Protein repair
5	UQCRFS1P1	P0C7P4	Putative cytochrome b-c1 complex subunit Rieske-like protein 1 OS=Homo sapiens GN=UQCRFS1P1 PE=5 SV=1	9	2	23	40	3	40	-	-	-	mitochondrial electron transport, ubiquinol to cytochrome c
6	VDAC3	Q9Y277	Voltage-dependent anion-selective channel protein 3 OS=Homo sapiens GN=VDAC3 PE=1 SV=1	18	11	54	26	9	26	-	-	-	voltage-gated anion channel activity
7	HMGCL	P35914	Hydroxymethylglutaryl-CoA lyase, mitochondrial OS=Homo sapiens GN=HMGCL PE=1 SV=2	22	11	36	-	-	-	10	4	21	Fatty acid/ketone metabolism
8	ACADVL	P49748-3	Isoform 3 of Very long-chain specific acyl-CoA dehydrogenase, mitochondrial OS=Homo sapiens GN=ACADVL	19	17	28	-	-	-	9	13	13	Fatty Acid Beta Oxidation
9	STOML2	Q9UJZ1	Stomatin-like protein 2, mitochondrial OS=Homo sapiens GN=STOML2 PE=1 SV=1	7	6	19	-	-	-	27	9	19	Regulator of Biogenesis and activity of mitochondria
10	MRPS25	P82663	28S ribosomal protein S25, mitochondrial OS=Homo sapiens GN=MRPS25 PE=1 SV=1	10	7	45	-	-	-	4	4	17	Translation
11	ECI1	P42126	Enoyl-CoA delta isomerase 1, mitochondrial OS=Homo sapiens GN=ECI1 PE=1 SV=1	15	3	13	-	-	-	4	5	13	Fatty acid beta-oxidation
12	TSFM	P43897	Elongation factor Ts, mitochondrial [OS=Homo sapiens]	-	-	-	9	7	9	7	1	9	translational elongation, regulation of DNA-templated transcription, elongation, mitochondrial translational elongation,
13	COQ8A	Q8NI60-2	Isoform 2 of Atypical kinase COQ8A, mitochondrial [OS=Homo sapiens]	-	-	-	32	11	11	7	1	40	protein phosphorylation, ubiquinone biosynthetic process, phosphorylation,
14	COX10	Q12887-2	Isoform 2 of Protoheme IX farnesyltransferase, mitochondrial [OS=Homo sapiens]	-	-	-	16	6	16	21	6	20	mitochondrial fission, mitochondrial electron transport, cytochrome c to oxygen, heme biosynthetic process, heme a biosynthetic process, respiratory chain complex IV assembly, aerobic respiration, cellular respiration, heme O biosynthetic process, hydrogen ion transmembrane transport,
15	GTPBP3	Q969Y2-4	Isoform 4 of tRNA modification GTPase GTPBP3, mitochondrial [OS=Homo sapiens]	-	-	-	4	2	15	10	2	13	tRNA wobble uridine modification, tRNA methylation,
16	PLD6	Q8N2A8	mitochondrial cardiolipin hydrolase [OS=Homo sapiens]	-	-	-	12	7	12	9	5	24	meiotic nuclear division, spermatid development, mitochondrial fusion, positive regulation of mitochondrial fusion, lipid catabolic process, P granule organization, cardiolipin biosynthetic process, piRNA metabolic process, DNA methylation involved in gamete generation, RNA phosphodiester bond hydrolysis, endonucleolytic,
17	TIMM17A	Q99595	Mitochondrial import inner membrane translocase subunit Tim17-A [OS=Homo sapiens]	-	-	-	20	12	20	8	3	41	protein targeting to mitochondrion, intracellular protein transport, protein import into mitochondrial matrix,
18	NDUFB5	O43674-1	NADH dehydrogenase [ubiquinone] 1 beta subcomplex subunit 5, mitochondrial [OS=Homo sapiens]	-	-	-	12	4	10	10	1	14	mitochondrial electron transport, NADH to ubiquinone, mitochondrial respiratory chain complex I assembly,
19	RSAD1	Q9HA92	Radical S-adenosyl methionine domain-containing protein 1, mitochondrial [OS=Homo sapiens]	-	-	-	7	3	7	16	9	11	porphyrin-containing compound biosynthetic process, oxidation-reduction process,
20	SHMT2	P34897-1	Serine hydroxymethyltransferase, mitochondrial [OS=Homo sapiens]	-	-	-	50	19	50	46	5	15	glycine metabolic process, L-serine metabolic process, L-serine biosynthetic process, one-carbon metabolic process, positive regulation of cell proliferation, glycine biosynthetic process from serine, response to type I interferon, tetrahydrofolate interconversion, tetrahydrofolate metabolic process, folic acid metabolic process, protein tetramerization, protein homotetramerization, protein K63-l…
21	GUF1	Q8N442	translation factor GUF1, mitochondrial [OS=Homo sapiens]	-	-	-	24	8	24	13	6	10	translation, positive regulation of translation,
22	PDK1	Q15118	[Pyruvate dehydrogenase (acetyl-transferring)] kinase isozyme 1, mitochondrial OS=Homo sapiens GN=PDK1 PE=1 SV=1	-	-	-	39	32	39	13	6	13	Carbohydrate metabolism, Glucose metabolism
23	MRPS17	Q9Y2R5	28S ribosomal protein S17, mitochondrial [OS=Homo sapiens]	-	-	-	22	1	16	10	1	12	translation, mitochondrial translation, mitochondrial translational elongation, mitochondrial translational termination,
24	MRPS6	P82932	28S ribosomal protein S6, mitochondrial [OS=Homo sapiens]	-	-	-	7	3	17	9	2	27	translation, mitochondrial translation, mitochondrial translational elongation, mitochondrial translational termination,
25	MRPL20	Q9BYC9	39S ribosomal protein L20, mitochondrial OS=Homo sapiens GN=MRPL20 PE=1 SV=1	-	-	-	64	16	64	23	2	14	Mitochondrial translation initiation; Mitochondrial translation elongation; Mitochondrial translation termination
26	ATP5MC1	P05496	ATP synthase F(0) complex subunit C1, mitochondrial [OS=Homo sapiens]	-	-	-	4	4	50	11	1	14	ATP biosynthetic process, ATP synthesis coupled proton transport,GO:0015991~ATP hydrolysis coupled proton transport,GO:0042776~mitochondrial ATP synthesis coupled proton transport,
27	BCAT2	O15382	Branched-chain-amino-acid aminotransferase, mitochondrial OS=Homo sapiens GN=BCAT2 PE=1 SV=2	-	-	-	36	12	36	16	11	15	Amino-acid biosynthesis, Branched-chain amino acid biosynthesis
28	TIMMDC1	Q9NPL8	Complex I assembly factor TIMMDC1, mitochondrial OS=Homo sapiens GN=TIMMDC1 PE=1 SV=2	-	-	-	31	11	31	18	5	19	mitochondrial respiratory chain complex I assembly
29	NDUFAF1	Q9Y375	Complex I intermediate-associated protein 30, mitochondrial OS=Homo sapiens GN=NDUFAF1 PE=1 SV=2	-	-	-	37	16	37	12	12	21	Complex I biogenesis
30	FDX2	Q6P4F2	Ferredoxin-2, mitochondrial [OS=Homo sapiens]	-	-	-	6	2	32	6	1	17	C21-steroid hormone biosynthetic process, sterol metabolic process, small molecule metabolic process, oxidation-reduction process,
31	GATB	O75879	Glutamyl-tRNA(Gln) amidotransferase subunit B, mitochondrial OS=Homo sapiens GN=GATB PE=1 SV=1	-	-	-	17	8	17	7	6	13	Protein biosynthesis
32	ISCU	Q9H1K1	Iron-sulfur cluster assembly enzyme ISCU, mitochondrial [OS=Homo sapiens]	-	-	-	6	2	31	3	1	16	cellular iron ion homeostasis, nitrogen fixation, iron-sulfur cluster assembly, small molecule metabolic process, [2Fe-2S] cluster assembly, protein maturation by iron-sulfur cluster transfer,
33	RHOT2	Q8IXI1-2	Isoform 2 of Mitochondrial Rho GTPase 2 [OS=Homo sapiens]	-	-	-	4	4	52	4	4	19	small GTPase mediated signal transduction, cellular homeostasis, mitochondrion transport along microtubule, regulation of small GTPase mediated signal transduction, mitochondrial outer membrane permeabilization,
34	NDUFS2	O75306-2	Isoform 2 of NADH dehydrogenase [ubiquinone] iron-sulfur protein 2, mitochondrial [OS=Homo sapiens]	-	-	-	11	2	8	17	1	7	mitochondrial electron transport, NADH to ubiquinone, response to oxidative stress, mitochondrial respiratory chain complex I assembly,
35	TRMU	O75648-3	Isoform 3 of Mitochondrial tRNA-specific 2-thiouridylase 1 [OS=Homo sapiens]	-	-	-	60	1	27	9	2	28	tRNA wobble position uridine thiolation, tRNA processing, mitochondrial tRNA thio-modification,
36	PTCD2	Q8WV60-3	Isoform 3 of Pentatricopeptide repeat-containing protein 2, mitochondrial [OS=Homo sapiens]	-	-	-	4	4	32	24	1	14	kidney development, liver development, mRNA processing, mitochondrion organization, muscle fiber development, regulation of mRNA processing, ventricular cardiac muscle tissue morphogenesis,
37	MRS2	Q9HD23-4	Isoform 4 of Magnesium transporter MRS2 homolog, mitochondrial OS=Homo sapiens GN=MRS2	-	-	-	10	9	43	5	4	15	Miscellaneous transport and binding events
38	TMLHE	Q9NVH6-8	Isoform 8 of Trimethyllysine dioxygenase, mitochondrial OS=Homo sapiens GN=TMLHE	-	-	-	12	1	3	36	7	16	carnitine biosynthesis
39	ERAL1	O75616-2	Isoform HERA-B of GTPase Era, mitochondrial [OS=Homo sapiens]	-	-	-	17	2	24	11	1	8	ribosomal small subunit assembly,
40	AUH	Q13825	Methylglutaconyl-CoA hydratase, mitochondrial OS=Homo sapiens GN=AUH PE=1 SV=1	-	-	-	11	5	11	10	11	18	Branched-chain amino acid catabolism
41	TIMM8A	O60220	Mitochondrial import inner membrane translocase subunit Tim8 A [OS=Homo sapiens]	-	-	-	5	1	32	34	1	32	nervous system development, chaperone-mediated protein transport,
42	SDHAF1	A6NFY7	succinate dehydrogenase assembly factor 1, mitochondrial [OS=Homo sapiens]	-	-	-	11	3	11	7	1	30	mitochondrial respiratory chain complex II assembly,
