# Supplementary material for: Mitochondrial O-GlcNAc Transferase Interacts with and Modifies Many Proteins and Its Up-Regulation Affects Mitochondrial Function and Cellular Energy Homeostasis
Source: Cancers (Basel). 2021 Jun 12;13(12):2956. doi: 10.3390/cancers13122956 (PMC8231590; doi:10.3390/cancers13122956)
Supplement: Supplementary file 1 [file cancers-13-02956-s001.zip › Table S2. O-GlcNAcylated candidates.xls]

## Sheet: Arkusz1
		mOGT-mediated O-GlcNAcylated candidates selected by comperative analysis of O-GlcNAc modified mitochondrial proteins derived from sincOGT+ pCDII-mOGT-HaloTag with sincOGT+ pmOGT-HaloTag treated cells. Proteins found in pHaloTag treated cells were excluded
				MCF-7			MDA-MB-231			Hs578t
Number	Gene	Accession Number	Protein name	Peptides	Unique peptides	Coverage (%)	Peptides	Unique peptides	Coverage (%)	Peptides	Unique peptides	Coverage (%)	Processes/Function
1	ALDH6A1	Q02252	Methylmalonate-semialdehyde dehydrogenase [acylating], mitochondrial OS=Homo sapiens GN=ALDH6A1 PE=1 SV=2	45	37	36	3	3	9	6	6	9	Branched-chain amino acid catabolism
2	MTCH2	Q9Y6C9	Mitochondrial carrier homolog 2 OS=Homo sapiens GN=MTCH2 PE=1 SV=1	22	9	32	2	2	11	-	-	-	apoptosis
3	MRPL24	Q96A35	39S ribosomal protein L24, mitochondrial OS=Homo sapiens GN=MRPL24 PE=1 SV=1	31	24	55	2	2	14	-	-	-	Mitochondrial translation initiation; Mitochondrial translation elongation; Mitochondrial translation termination
4	MRPL28	Q13084	39S ribosomal protein L28, mitochondrial OS=Homo sapiens GN=MRPL28 PE=1 SV=4	37	22	52	4	4	15	-	-	-	Mitochondrial translation initiation; Mitochondrial translation elongation; Mitochondrial translation termination
5	ACSS3	Q9H6R3	Acyl-CoA synthetase short-chain family member 3, mitochondrial OS=Homo sapiens GN=ACSS3 PE=1 SV=1	4	3	6	11	11	14	-	-	-	Synthesis of Ketone Bodies
6	AGK	Q53H12	Acylglycerol kinase, mitochondrial OS=Homo sapiens GN=AGK PE=1 SV=2	8	8	17	4	4	9	-	-	-	Glycerophospholipid biosynthesis
7	CS	O75390	Citrate synthase, mitochondrial OS=Homo sapiens GN=CS PE=1 SV=2	75	55	52	4	4	5	-	-	-	Amino Acid metabolism; TCA Cycle
8	BDH1	Q02338	D-beta-hydroxybutyrate dehydrogenase, mitochondrial OS=Homo sapiens GN=BDH1 PE=1 SV=3	11	11	28	3	3	8	-	-	-	Synthesis and Degradation of Ketone Bodies
9	TUFM	P49411	Elongation factor Tu, mitochondrial OS=Homo sapiens GN=TUFM PE=1 SV=2	152	104	59	9	9	16	-	-	-	Mitochondrial translation elongation
10	ECHS1	P30084	Enoyl-CoA hydratase, mitochondrial OS=Homo sapiens GN=ECHS1 PE=1 SV=4	169	57	53	6	6	11	-	-	-	Fatty Acid Beta Oxidation; Fatty Acid Biosynthesis; Tryptophan metabolism
11	HSCB	Q8IWL3	Iron-sulfur cluster co-chaperone protein HscB, mitochondrial OS=Homo sapiens GN=HSCB PE=1 SV=3	5	5	20	4	4	21	-	-	-	Mitochondrial protein import; Mitochondrial iron-sulfur cluster biogenesis
12	MRPL30	Q8TCC3-2	Isoform 2 of 39S ribosomal protein L30, mitochondrial OS=Homo sapiens GN=MRPL30	7	5	27	6	6	28	-	-	-	Mitochondrial translation initiation; Mitochondrial translation elongation; Mitochondrial translation termination
13	ACOT9	Q9Y305-4	Isoform 4 of Acyl-coenzyme A thioesterase 9, mitochondrial OS=Homo sapiens GN=ACOT9	12	11	19	2	2	10	-	-	-	Mitochondrial Fatty Acid Beta-Oxidation
14	NDUFA10	O95299-2	Isoform 2 of NADH dehydrogenase [ubiquinone] 1 alpha subcomplex subunit 10, mitochondrial OS=Homo sapiens GN=NDUFA10	6	6	4	1	1	7	-	-	-	Electron transport; Respiratory Chain
15	TIMM44	O43615	Mitochondrial import inner membrane translocase subunit TIM44 OS=Homo sapiens GN=TIMM44 PE=1 SV=2	25	20	31	12	12	13	-	-	-	Mitochondrial protein import
16	NDUFS3	O75489	NADH dehydrogenase [ubiquinone] iron-sulfur protein 3, mitochondrial OS=Homo sapiens GN=NDUFS3 PE=1 SV=1	59	33	53	1	1	19	-	-	-	Respiratory electron transport; Complex I biogenesis
17	MTPAP	Q9NVV4	Poly(A) RNA polymerase, mitochondrial OS=Homo sapiens GN=MTPAP PE=1 SV=1	8	8	15	7	7	8	-	-	-	mRNA processing, Transcription
18	POLDIP2	Q9Y2S7	Polymerase delta-interacting protein 2 OS=Homo sapiens GN=POLDIP2 PE=1 SV=1	16	13	25	3	3	14	-	-	-	positive regulation of mitotic cell cycle; negative regulation of macroautophagy; negative regulation of macroautophagy
19	SCO1	O75880	Protein SCO1 homolog, mitochondrial OS=Homo sapiens GN=SCO1 PE=1 SV=1	13	9	29	10	10	19	-	-	-	Electron Transport Chain; Copper homeostasis
20	RDH13	Q8NBN7	Retinol dehydrogenase 13 OS=Homo sapiens GN=RDH13 PE=1 SV=2	8	8	24	5	5	13	-	-	-	retinol metabolism
21	SSBP1	Q04837	Single-stranded DNA-binding protein, mitochondrial OS=Homo sapiens GN=SSBP1 PE=1 SV=1	20	12	74	3	3	14	-	-	-	mitochondrial DNA replication
22	MRPL9	Q9BYD2	39S ribosomal protein L9, mitochondrial OS=Homo sapiens GN=MRPL9 PE=1 SV=2	30	23	43	-	-	-	4	4	19	Mitochondrial translation initiation; Mitochondrial translation elongation; Mitochondrial translation termination
23	ACSF3	Q4G176	Acyl-CoA synthetase family member 3, mitochondrial OS=Homo sapiens GN=ACSF3 PE=1 SV=3	20	16	27	-	-	-	7	7	11	Fatty acid metabolism, Lipid metabolism
24	UQCRC1	P31930	Cytochrome b-c1 complex subunit 1, mitochondrial OS=Homo sapiens GN=UQCRC1 PE=1 SV=3	87	56	54	-	-	-	9	9	12	Electron Transport Chain
25	FECH	P22830-2	Isoform 2 of Ferrochelatase, mitochondrial OS=Homo sapiens GN=FECH	6	5	12	-	-	-	4	4	16	heme biosynthetic process; porphyrin biosynthesis; response to dexamethasone stimulus, arsenic-containing substance, ethanol, insecticide, lead ion, methylmercury, platinum ion
26	NDUFS1	P28331-2	Isoform 2 of NADH-ubiquinone oxidoreductase 75 kDa subunit, mitochondrial OS=Homo sapiens GN=NDUFS1	151	89	53	-	-	-	3	3	7	mitochondrial respiratory chain complex I assembly; apoptotic mitochondrial changes
27	NUDT6	P53370	Nucleoside diphosphate-linked moiety X motif 6 OS=Homo sapiens GN=NUDT6 PE=1 SV=2	7	7	25	-	-	-	4	4	12	regulation of cell cycle
28	OXCT1	P55809	Succinyl-CoA:3-ketoacid coenzyme A transferase 1, mitochondrial OS=Homo sapiens GN=OXCT1 PE=1 SV=1	10	9	13	-	-	-	7	5	22	Synthesis and Degradation of Ketone Bodies
29	OXSM	Q9NWU1-1	3-oxoacyl-[acyl-carrier-protein] synthase, mitochondrial [OS=Homo sapiens]	-	-	-	2	2	10	2	2	5	fatty acid biosynthetic process, acyl-CoA metabolic process, metabolic process, short-chain fatty acid biosynthetic process, medium-chain fatty acid biosynthetic process,
30	MRPL42	Q9Y6G3	39S ribosomal protein L42, mitochondrial [OS=Homo sapiens]	-	-	-	2	2	9	2	2	15	translation, mitochondrial translational elongation, mitochondrial translational termination,
31	FASTKD1	Q53R41-2	Isoform 2 of FAST kinase domain-containing protein 1, mitochondrial [OS=Homo sapiens]	-	-	-	3	3	7	3	3	10	protein phosphorylation, cellular respiration,
32	SLIRP	Q9GZT3-2	Isoform 2 of SRA stem-loop-interacting RNA-binding protein, mitochondrial [OS=Homo sapiens]	-	-	-	2	2	30	2	2	30	negative regulation of mitochondrial RNA catabolic process, transcription, DNA-templated, regulation of transcription, DNA-templated, spermatid development, single fertilization, sperm motility, mitochondrion morphogenesis,
33	METTL17	Q9H7H0-3	Isoform 3 of Methyltransferase-like protein 17, mitochondrial [OS=Homo sapiens]	-	-	-	2	2	5	2	2	5	translation, respiratory chain complex IV assembly, aerobic respiration, methylation,
