# Supplementary material for: Mitochondrial O-GlcNAc Transferase Interacts with and Modifies Many Proteins and Its Up-Regulation Affects Mitochondrial Function and Cellular Energy Homeostasis
Source: Cancers (Basel). 2021 Jun 12;13(12):2956. doi: 10.3390/cancers13122956 (PMC8231590; doi:10.3390/cancers13122956)
Supplement: Supplementary file 1 [file cancers-13-02956-s001.zip › Table S3. Both method per cell line.xls]

## Sheet: Arkusz1
					Co-existence			HaloLink® Resin; pmOGT-HaloTag vs pHaloTag treatment			IP RL2; mOGT-HaloTag vs pHaloTag treatment
Cell Line	Number	Gene	Accession Number	Protein name	MCF-7	MDA-MB-231	Hs 578t	Peptides	Unique peptides	Coverage (%)	Peptides	Unique peptides	Coverage (%)	Processes/Function
MCF-7	1	COQ5	Q5HYK3	2-methoxy-6-polyprenyl-1,4-benzoquinol methylase, mitochondrial OS=Homo sapiens GN=COQ5 PE=1 SV=2	Yes	no	no	4	4	14	10	9	28	Ubiquinone biosynthesis
	2	OGDH	E9PCR7	2-oxoglutarate dehydrogenase, mitochondrial OS=Homo sapiens GN=OGDH PE=1 SV=1	Yes	no	no	31	25	30	43	38	23	tricarboxylic acid cycle
	3	AK2	P54819	Adenylate kinase 2, mitochondrial OS=Homo sapiens GN=AK2 PE=1 SV=2	Yes	Yes	Yes	9	6	24	19	7	34	ATP, AMP metabolic, ADP biosynthesis
	4	N/A	B4DLN1	cDNA FLJ60124, highly similar to Mitochondrial dicarboxylate carrier OS=Homo sapiens PE=2 SV=1	Yes	no	no	21	2	14	25	18	15	mitochondrial transport
	5	DHRS4	Q9BTZ2	Dehydrogenase/reductase SDR family member 4 OS=Homo sapiens GN=DHRS4 PE=1 SV=3	Yes	no	no	4	4	13	5	5	14	steroid/ ketone metabolic
	6	HMGCL	P35914	Hydroxymethylglutaryl-CoA lyase, mitochondrial OS=Homo sapiens GN=HMGCL PE=1 SV=2	Yes	no	Yes	22	11	36	14	13	21	Fatty acid/ketone metabolism
	7	NDUFA10	O95299-2	Isoform 2 of NADH dehydrogenase [ubiquinone] 1 alpha subcomplex subunit 10, mitochondrial OS=Homo sapiens GN=NDUFA10	Yes	Yes	Yes	4	4	9	6	6	4	Electron transport; Respiratory Chain
	8	ALDH5A1	P51649-2	Isoform 2 of Succinate-semialdehyde dehydrogenase, mitochondrial OS=Homo sapiens GN=ALDH5A1	Yes	no	no	8	8	16	69	49	29	Amino Acid metabolism
	9	ACADVL	P49748-3	Isoform 3 of Very long-chain specific acyl-CoA dehydrogenase, mitochondrial OS=Homo sapiens GN=ACADVL	Yes	no	Yes	19	17	28	99	75	45	Fatty Acid Beta Oxidation
	10	MDH2	A0A024R4K3	Malate dehydrogenase OS=Homo sapiens GN=MDH2 PE=2 SV=1	Yes	no	no	40	18	57	118	78	68	TCA cycle
	11	MTCH2	Q9Y6C9	Mitochondrial carrier homolog 2 OS=Homo sapiens GN=MTCH2 PE=1 SV=1	Yes	Yes	no	33	12	49	22	9	32	apoptosis
	12	MTHFD1L	B7ZM99	MTHFD1L protein OS=Homo sapiens GN=MTHFD1L PE=1 SV=1	Yes	no	no	5	5	6	5	5	5	ATP binding
	13	PHB	A8K401	Prohibitin, isoform CRA_a OS=Homo sapiens GN=PHB PE=2 SV=1	Yes	no	no	19	13	46	30	20	43	DNA biosynthesis
	14	SHMT2	P34897	Serine hydroxymethyltransferase, mitochondrial OS=Homo sapiens GN=SHMT2 PE=1 SV=3	Yes	no	no	11	10	21	73	59	53	Amino Acid metabolism/ Mitochondrial translation
	15	N/A	B4DRS6	Sideroflexin OS=Homo sapiens PE=2 SV=1	Yes	no	no	11	5	20	21	14	32	Ion transport
	16	STOML2	Q9UJZ1	Stomatin-like protein 2, mitochondrial OS=Homo sapiens GN=STOML2 PE=1 SV=1	Yes	no	Yes	7	6	19	16	13	19	Regulator of Biogenesis and activity of mitochondria
	17	TUSC3	Q13454	Tumor suppressor candidate 3 OS=Homo sapiens GN=TUSC3 PE=1 SV=1	Yes	no	no	8	3	14	6	5	11	Ion transport
MDA-MB-231	1	MRPS12	O15235	28S ribosomal protein S12, mitochondrial [OS=Homo sapiens]	no	Yes	no	16	7	16	1	1	22	translation, mitochondrial translation, mitochondrial translational elongation, mitochondrial translational termination,
	2	OXSM	Q9NWU1-1	3-oxoacyl-[acyl-carrier-protein] synthase, mitochondrial [OS=Homo sapiens]	no	Yes	Yes	26	10	26	2	2	10	fatty acid biosynthetic process, acyl-CoA metabolic process, metabolic process, short-chain fatty acid biosynthetic process, medium-chain fatty acid biosynthetic process,
	3	AGK	Q53H12	Acylglycerol kinase, mitochondrial [OS=Homo sapiens]	Yes	Yes	no	34	7	34	4	4	9	Glycerophospholipid biosynthesis
	4	ATP5MG	O75964	ATP synthase subunit g, mitochondrial [OS=Homo sapiens]	no	Yes	no	29	12	29	1	1	40	ATP biosynthetic process, ATP synthesis coupled proton transport, mitochondrial ATP synthesis coupled proton transport,
	5	CPT1C	Q8TCG5-1	Carnitine O-palmitoyltransferase 1, brain isoform [OS=Homo sapiens]	no	Yes	no	16	9	16	3	3	3	fatty acid beta-oxidation, carnitine metabolic process,
	6	COA4	Q9NYJ1-1	Cytochrome c oxidase assembly factor 4 homolog, mitochondrial [OS=Homo sapiens]	no	Yes	no	11	3	16	1	1	23	mitochondrial respiratory chain complex IV assembly,
	7	TSFM	P43897	Elongation factor Ts, mitochondrial [OS=Homo sapiens]	no	Yes	Yes	9	7	9	2	2	6	translational elongation, regulation of DNA-templated transcription, elongation, mitochondrial translational elongation,
	8	DECR1	Q16698-2	Isoform 2 of 2,4-dienoyl-CoA reductase, mitochondrial [OS=Homo sapiens]	no	Yes	no	7	4	7	2	2	6	fatty acid beta-oxidation, protein homotetramerization,
	9	MRPS27	Q92552-2	Isoform 2 of 28S ribosomal protein S27, mitochondrial [OS=Homo sapiens]	no	Yes	no	6	2	11	1	1	8	mitochondrial translational elongation, mitochondrial translational termination,
	10	AKAP1	Q92667-2	Isoform 2 of A-kinase anchor protein 1, mitochondrial [OS=Homo sapiens]	no	Yes	no	21	12	9	3	3	7	blood coagulation,regulation of protein kinase A signaling,
	11	ATP5PF	P18859-2	Isoform 2 of ATP synthase-coupling factor 6, mitochondrial [OS=Homo sapiens]	no	Yes	no	29	13	29	1	1	14	ATP biosynthetic process, ATP synthesis coupled proton transport, aromatic compound catabolic process, substantia nigra development, mitochondrial ATP synthesis coupled proton transport,
	12	COQ8A	Q8NI60-2	Isoform 2 of Atypical kinase COQ8A, mitochondrial [OS=Homo sapiens]	no	Yes	Yes	32	11	11	3	3	20	protein phosphorylation, ubiquinone biosynthetic process, phosphorylation,
	13	GATM	P50440-2	Isoform 2 of Glycine amidinotransferase, mitochondrial [OS=Homo sapiens]	no	Yes	no	10	2	12	1	1	6	creatine metabolic process, creatine biosynthetic process,
	14	MIEF1	Q9NQG6-2	Isoform 2 of Mitochondrial dynamics protein MID51 [OS=Homo sapiens]	no	Yes	no	4	1	24	1	1	21	mitochondrial fission, mitochondrial fusion, positive regulation of mitochondrial fission, positive regulation of protein targeting to membrane,
	15	MAPK1	P28482-2	Isoform 2 of Mitogen-activated protein kinase 1 [OS=Homo sapiens]	no	Yes	no	16	2	16	2	2	19	MAPK cascade, activation of MAPK activity, MAPK import into nucleus, transcription, DNA-templated, protein phosphorylation, apoptotic process, chemotaxis, response to stress, cellular response to DNA damage stimulus, cell cycle, signal transduction, chemical synaptic transmission, axon guidance, positive regulation of cell proliferation, fibroblast growth factor receptor signaling pathway, respon…
	16	NDUFA10	O95299-2	Isoform 2 of NADH dehydrogenase [ubiquinone] 1 alpha subcomplex subunit 10, mitochondrial [OS=Homo sapiens]	Yes	Yes	Yes	8	4	8	1	1	7	Electron transport; Respiratory Chain
	17	NDUFB11	Q9NX14-2	Isoform 2 of NADH dehydrogenase [ubiquinone] 1 beta subcomplex subunit 11, mitochondrial [OS=Homo sapiens]	no	Yes	no	6	2	19	1	1	31	mitochondrial electron transport, NADH to ubiquinone, mitochondrial respiratory chain complex I assembly,
	18	COX10	Q12887-2	Isoform 2 of Protoheme IX farnesyltransferase, mitochondrial [OS=Homo sapiens]	no	Yes	Yes	16	6	16	1	1	19	mitochondrial fission, mitochondrial electron transport, cytochrome c to oxygen, heme biosynthetic process, heme a biosynthetic process, respiratory chain complex IV assembly, aerobic respiration, cellular respiration, heme O biosynthetic process, hydrogen ion transmembrane transport,
	19	ACSS1	Q9NUB1-3	Isoform 3 of Acetyl-coenzyme A synthetase 2-like, mitochondrial [OS=Homo sapiens]	no	Yes	no	4	3	4	4	3	7	ethanol oxidation, acetyl-CoA biosynthetic process, metabolic process, acetate biosynthetic process, acetyl-CoA biosynthetic process from acetate, propionate biosynthetic process,
	20	ATP5MF	P56134-3	Isoform 3 of ATP synthase subunit f, mitochondrial [OS=Homo sapiens]	no	Yes	no	10	1	51	1	1	31	ATP biosynthetic process, proton transport, mitochondrial ATP synthesis coupled proton transport,
	21	TXNRD2	Q9NNW7-3	Isoform 3 of Thioredoxin reductase 2, mitochondrial [OS=Homo sapiens]	no	Yes	no	8	4	8	2	2	7	response to reactive oxygen species, response to oxygen radical, cell redox homeostasis, oxidation-reduction process, cellular oxidant detoxification,
	22	ABCB8	Q9NUT2-4	Isoform 4 of ATP-binding cassette sub-family B member 8, mitochondrial [OS=Homo sapiens]	no	Yes	no	27	7	27	6	6	6	transport, transmembrane transport,
	23	GTPBP3	Q969Y2-4	Isoform 4 of tRNA modification GTPase GTPBP3, mitochondrial [OS=Homo sapiens]	no	Yes	Yes	4	2	15	1	1	11	tRNA wobble uridine modification, tRNA methylation,
	24	BCAT2	O15382-2	Isoform B of Branched-chain-amino-acid aminotransferase, mitochondrial [OS=Homo sapiens]	no	Yes	no	4	1	6	3	3	6	aspartate biosynthetic process, isoleucine catabolic process, metabolic process, cellular amino acid biosynthetic process, branched-chain amino acid biosynthetic process, branched-chain amino acid catabolic process, leucine biosynthetic process, valine biosynthetic process, regulation of hormone levels,
	25	MSRB2	Q9Y3D2	Methionine-R-sulfoxide reductase B2, mitochondrial [OS=Homo sapiens]	Yes	Yes	Yes	18	11	10	1	1	21	Protein repair
	26	ALDH6A1	Q02252	Methylmalonate-semialdehyde dehydrogenase [acylating], mitochondrial [OS=Homo sapiens]	Yes	Yes	Yes	23	7	23	3	3	9	Branched-chain amino acid catabolism
	27	PLD6	Q8N2A8	mitochondrial cardiolipin hydrolase [OS=Homo sapiens]	no	Yes	Yes	12	7	12	1	1	13	meiotic nuclear division, spermatid development, mitochondrial fusion, positive regulation of mitochondrial fusion, lipid catabolic process, P granule organization, cardiolipin biosynthetic process, piRNA metabolic process, DNA methylation involved in gamete generation, RNA phosphodiester bond hydrolysis, endonucleolytic,
	28	MCCD1	P59942	Mitochondrial coiled-coil domain protein 1 [OS=Homo sapiens]	no	Yes	no	10	2	26	1	1	26	-
	29	TIMM17A	Q99595	Mitochondrial import inner membrane translocase subunit Tim17-A [OS=Homo sapiens]	no	Yes	Yes	20	12	20	1	1	18	protein targeting to mitochondrion, intracellular protein transport, protein import into mitochondrial matrix,
	30	TIMM50	Q3ZCQ8	Mitochondrial import inner membrane translocase subunit TIM50 [OS=Homo sapiens]	no	Yes	no	10	3	10	2	2	8	release of cytochrome c from mitochondria, protein dephosphorylation mitochondrial membrane organization, protein transport, protein import into mitochondrial matrix, peptidyl-tyrosine dephosphorylation,
	31	NDUFB5	O43674-1	NADH dehydrogenase [ubiquinone] 1 beta subcomplex subunit 5, mitochondrial [OS=Homo sapiens]	no	Yes	Yes	12	4	10	1	1	14	mitochondrial electron transport, NADH to ubiquinone, mitochondrial respiratory chain complex I assembly,
	32	NDUFS3	O75489	NADH dehydrogenase [ubiquinone] iron-sulfur protein 3, mitochondrial [OS=Homo sapiens]	Yes	Yes	no	13	12	13	1	1	19	Respiratory electron transport; Complex I biogenesis
	33	EXOG	Q9Y2C4	Nuclease EXOG, mitochondrial [OS=Homo sapiens]	no	Yes	no	13	4	7	1	1	10	nucleic acid phosphodiester bond hydrolysis,
	34	PET100	P0DJ07	Protein PET100 homolog, mitochondrial [OS=Homo sapiens]	no	Yes	no	24	3	24	6	6	40	mitochondrial respiratory chain complex IV assembly,
	35	LIPT2	A6NK58	Putative lipoyltransferase 2, mitochondrial [OS=Homo sapiens]	no	Yes	no	15	7	15	1	1	13	cellular protein modification process, lipoate biosynthetic process, protein lipoylation, glyoxylate metabolic process,
	36	RSAD1	Q9HA92	Radical S-adenosyl methionine domain-containing protein 1, mitochondrial [OS=Homo sapiens]	no	Yes	Yes	7	3	7	1	1	4	porphyrin-containing compound biosynthetic process, oxidation-reduction process,
	37	SHMT2	P34897-1	Serine hydroxymethyltransferase, mitochondrial [OS=Homo sapiens]	no	Yes	Yes	50	19	50	4	4	8	glycine metabolic process, L-serine metabolic process, L-serine biosynthetic process, one-carbon metabolic process, positive regulation of cell proliferation, glycine biosynthetic process from serine, response to type I interferon, tetrahydrofolate interconversion, tetrahydrofolate metabolic process, folic acid metabolic process, protein tetramerization, protein homotetramerization, protein K63-l…
	38	SLIRP	Q9GZT3-1	SRA stem-loop-interacting RNA-binding protein, mitochondrial [OS=Homo sapiens]	no	Yes	no	6	3	6	2	2	31	negative regulation of mitochondrial RNA catabolic process, transcription, DNA-templated, regulation of transcription, DNA-templated, spermatid development, single fertilization, sperm motility, mitochondrion morphogenesis,
	39	GUF1	Q8N442	translation factor GUF1, mitochondrial [OS=Homo sapiens]	no	Yes	Yes	24	8	24	1	1	3	translation, positive regulation of translation,
	40	WARS2	Q9UGM6-1	Tryptophan--tRNA ligase, mitochondrial [OS=Homo sapiens]	no	Yes	no	8	3	8	2	2	9	vasculogenesis, tRNA aminoacylation for protein translation, tryptophanyl-tRNA aminoacylation,
	41	MYG1	Q9HB07	UPF0160 protein MYG1, mitochondrial [OS=Homo sapiens]	no	Yes	no	18	12	18	2	2	6	locomotory exploration behavior, pigmentation,
Hs578t	1	MRPS16	Q9Y3D3	28S ribosomal protein S16, mitochondrial [OS=Homo sapiens]	no	no	Yes	14	3	16	5	5	26	translation, mitochondrial translation, mitochondrial translational elongation, mitochondrial translational termination,
	2	MRPS35	P82673-1	28S ribosomal protein S35, mitochondrial [OS=Homo sapiens]	no	no	Yes	26	7	16	5	5	10	DNA damage response, detection of DNA damage, mitochondrial translational elongation,mitochondrial translational termination,
	3	MRPS5	P82675	28S ribosomal protein S5, mitochondrial [OS=Homo sapiens]	no	no	Yes	15	5	14	3	3	14	translation, mitochondrial translational elongation, mitochondrial translational termination,
	4	MRPL42	Q9Y6G3	39S ribosomal protein L42, mitochondrial [OS=Homo sapiens]	no	Yes	Yes	5	3	12	2	2	15	translation, mitochondrial translational elongation, mitochondrial translational termination,
	5	OXSM	Q9NWU1-1	3-oxoacyl-[acyl-carrier-protein] synthase, mitochondrial [OS=Homo sapiens]	no	Yes	Yes	21	11	26	2	2	5	fatty acid biosynthetic process, acyl-CoA metabolic process, metabolic process, short-chain fatty acid biosynthetic process, medium-chain fatty acid biosynthetic process,
	6	UQCRH	P07919	Cytochrome b-c1 complex subunit 6, mitochondrial [OS=Homo sapiens]	no	no	Yes	8	3	65	3	3	37	oxidative phosphorylation,mitochondrial electron transport, ubiquinol to cytochrome c, aerobic respiration, oxidation-reduction process, hydrogen ion transmembrane transport,
	7	COX6A2	Q02221	Cytochrome c oxidase subunit 6A2, mitochondrial [OS=Homo sapiens]	no	no	Yes	7	2	27	2	2	27	generation of precursor metabolites and energy, mitochondrial electron transport, cytochrome c to oxygen, aerobic respiration, regulation of catalytic activity, hydrogen ion transmembrane transport,
	8	COX8A	P10176	cytochrome c oxidase subunit 8A, mitochondrial [OS=Homo sapiens]	no	no	Yes	4	2	51	5	5	51	generation of precursor metabolites and energy, mitochondrial electron transport, cytochrome c to oxygen, hydrogen ion transmembrane transport,
	9	CYP11B2	P19099	Cytochrome P450 11B2, mitochondrial [OS=Homo sapiens]	no	no	Yes	14	8	11	8	7	8	regulation of blood volume by renal aldosterone, renal water homeostasis, C21-steroid hormone biosynthetic process, mineralocorticoid biosynthetic process, cholesterol metabolic process, sterol metabolic process, aldosterone biosynthetic process, cellular response to hormone stimulus, cortisol biosynthetic process, cellular response to potassium ion, secondary metabolite biosynthetic process, pot…
	10	DGUOK	Q16854	Deoxyguanosine kinase, mitochondrial [OS=Homo sapiens]	no	no	Yes	10	1	9	2	2	9	protein phosphorylation, guanosine metabolic process deoxyribonucleoside monophosphate biosynthetic process, nucleotide biosynthetic process, negative regulation of neuron projection development, purine-containing compound salvage, dGTP metabolic process, purine deoxyribonucleoside metabolic process,
	11	ECI1	P42126	Enoyl-CoA delta isomerase 1, mitochondrial [OS=Homo sapiens]	Yes	no	Yes	4	5	13	3	3	12	Fatty acid beta-oxidation
	12	GLUD1	P00367	Glutamate dehydrogenase 1, mitochondrial [OS=Homo sapiens]	no	no	Yes	22	9	12	6	6	7	cellular amino acid metabolic process, glutamate biosynthetic process, glutamate catabolic process, glutamine metabolic process, cellular amino acid biosynthetic process, substantia nigra development, positive regulation of insulin secretion, oxidation-reduction process, tricarboxylic acid metabolic process,
	13	TDH	Q8IZJ6	Inactive L-threonine 3-dehydrogenase, mitochondrial [OS=Homo sapiens]	no	no	Yes	15	7	14	4	4	18	L-threonine catabolic process to glycine,
	14	ISCU	Q9H1K1	Iron-sulfur cluster assembly enzyme ISCU, mitochondrial [OS=Homo sapiens]	no	Yes	Yes	3	1	16	2	2	17	cellular iron ion homeostasis, nitrogen fixation, iron-sulfur cluster assembly, small molecule metabolic process, [2Fe-2S] cluster assembly, protein maturation by iron-sulfur cluster transfer,
	15	OXSM	Q9NWU1-2	Isoform 2 of 3-oxoacyl-[acyl-carrier-protein] synthase, mitochondrial [OS=Homo sapiens]	no	no	Yes	12	2	18	2	2	8	fatty acid biosynthetic process, acyl-CoA metabolic process, metabolic process, short-chain fatty acid biosynthetic process, medium-chain fatty acid biosynthetic process,
	16	ATP5MC2	Q06055-2	Isoform 2 of ATP synthase F(0) complex subunit C2, mitochondrial [OS=Homo sapiens]	no	no	Yes	5	2	16	2	1	31	ATP biosynthetic process, ATP synthesis coupled proton transport, ATP hydrolysis coupled proton transport, mitochondrial ATP synthesis coupled proton transport,
	17	TMEM126B	Q8IUX1-2	Isoform 2 of Complex I assembly factor TMEM126B, mitochondrial [OS=Homo sapiens]	no	no	Yes	20	10	46	4	4	16	mitochondrial respiratory chain complex I assembly,
	18	DMGDH	Q9UI17-2	Isoform 2 of Dimethylglycine dehydrogenase, mitochondrial [OS=Homo sapiens]	no	no	Yes	16	1	5	4	2	15	glycine metabolic process, amino-acid betaine catabolic process, choline metabolic process, choline catabolic process, oxidation-reduction process,
	19	IDH2	P48735-2	Isoform 2 of Isocitrate dehydrogenase [NADP], mitochondrial [OS=Homo sapiens]	no	no	Yes	8	2	7	2	2	7	carbohydrate metabolic process, glyoxylate cycle, tricarboxylic acid cycle, isocitrate metabolic process, 2-oxoglutarate metabolic process,
	20	MRS2	Q9HD23-2	Isoform 2 of Magnesium transporter MRS2 homolog, mitochondrial [OS=Homo sapiens]	no	no	Yes	19	3	9	2	2	12	mitochondrial magnesium ion transport, transmembrane transport, mitochondrial magnesium ion transmembrane transport,
	21	NDUFS2	O75306-2	Isoform 2 of NADH dehydrogenase [ubiquinone] iron-sulfur protein 2, mitochondrial [OS=Homo sapiens]	no	Yes	Yes	17	1	7	2	2	7	mitochondrial electron transport, NADH to ubiquinone, response to oxidative stress, mitochondrial respiratory chain complex I assembly,
	22	OAT	P04181-2	Isoform 2 of Ornithine aminotransferase, mitochondrial [OS=Homo sapiens]	no	no	Yes	7	3	19	3	3	15	visual perception, cellular amino acid biosynthetic process, arginine catabolic process to proline via ornithine, arginine catabolic process to glutamate, protein hexamerization, L-proline biosynthetic process,
	23	SLIRP	Q9GZT3-2	Isoform 2 of SRA stem-loop-interacting RNA-binding protein, mitochondrial [OS=Homo sapiens]	no	Yes	Yes	4	1	30	2	2	30	negative regulation of mitochondrial RNA catabolic process, transcription, DNA-templated, regulation of transcription, DNA-templated, spermatid development, single fertilization, sperm motility, mitochondrion morphogenesis,
	24	HADHB	P55084-2	Isoform 2 of Trifunctional enzyme subunit beta, mitochondrial [OS=Homo sapiens]	no	no	Yes	14	7	18	3	3	5	atty acid beta-oxidation, metabolic process, cardiolipin acyl-chain remodeling,
	25	GTPBP3	Q969Y2-2	Isoform 2 of tRNA modification GTPase GTPBP3, mitochondrial [OS=Homo sapiens]	no	no	Yes	3	1	6	2	2	10	tRNA wobble uridine modification, tRNA methylation,
	26	LONP1	P36776-3	Isoform 3 of Lon protease homolog, mitochondrial [OS=Homo sapiens]	no	no	Yes	12	1	5	2	2	3	mitochondrial genome maintenance, response to hypoxia, misfolded or incompletely synthesized protein catabolic process, mitochondrion organization, aging, response to hormone, response to aluminum ion, protein catabolic process, mitochondrial DNA metabolic process, cellular response to oxidative stress, chaperone-mediated protein complex assembly, protein homooligomerization, proteolysis involved…
	27	METTL17	Q9H7H0-3	Isoform 3 of Methyltransferase-like protein 17, mitochondrial [OS=Homo sapiens]	no	Yes	Yes	26	2	4	2	2	5	translation, respiratory chain complex IV assembly, aerobic respiration, methylation,
	28	MTRF1L	Q9UGC7-3	Isoform 3 of Peptide chain release factor 1-like, mitochondrial [OS=Homo sapiens]	no	no	Yes	16	7	29	3	3	13	mitochondrial translational termination,
	29	OPA1	O60313-10	Isoform 4 of Dynamin-like 120 kDa protein, mitochondrial [OS=Homo sapiens]	no	no	Yes	13	1	3	2	2	4	mitochondrial genome maintenance, mitochondrial fission, dynamin polymerization involved in mitochondrial fission, apoptotic process, mitochondrion organization, inner mitochondrial membrane organization, aging, visual perception, mitochondrial fusion, positive regulation of mitochondrial fusion, positive regulation of neuron maturation, axonal transport of mitochondrion, negative regulation of r…
	30	MAVS	Q7Z434-4	Isoform 4 of Mitochondrial antiviral-signaling protein [OS=Homo sapiens]	no	no	Yes	13	2	13	2	2	17	positive regulation of protein phosphorylation, activation of innate immune response, positive regulation of defense response to virus by host, signal transduction, negative regulation of type I interferon production, positive regulation of interferon-alpha production, positive regulation of interferon-beta production, positive regulation of interleukin-8 production, positive regulation of tumor …
	31	MTO1	Q9Y2Z2-5	Isoform 6 of Protein MTO1 homolog, mitochondrial [OS=Homo sapiens]	no	no	Yes	6	6	15	2	2	6	tRNA processing, tRNA methylation, oxidation-reduction process, mitochondrial tRNA wobble uridine modification,
	32	TIMM21	Q9BVV7	Mitochondrial import inner membrane translocase subunit TIM21 [OS=Homo sapiens]	no	no	Yes	5	1	8	2	2	8	protein import into mitochondrial matrix, mitochondrial respiratory chain complex I assembly, mitochondrial respiratory chain complex IV assembly,
	33	TIMM8A	O60220	Mitochondrial import inner membrane translocase subunit Tim8 A [OS=Homo sapiens]	no	Yes	Yes	34	1	32	4	4	47	nervous system development, chaperone-mediated protein transport,
	34	NFU1	Q9UMS0	NFU1 iron-sulfur cluster scaffold homolog, mitochondrial [OS=Homo sapiens]	no	no	Yes	18	4	18	4	4	25	iron-sulfur cluster assembly,
	35	OTC	P00480	Ornithine carbamoyltransferase, mitochondrial [OS=Homo sapiens]	no	no	Yes	11	8	12	2	2	7	urea cycle, liver development, ornithine catabolic process, midgut development, response to zinc ion, citrulline biosynthetic process, esponse to insulin, arginine biosynthetic process via ornithine, response to drug, anion homeostasis, protein homotrimerization, response to biotin, ammonia homeostasis,
	36	PYCR1	P32322	Pyrroline-5-carboxylate reductase 1, mitochondrial [OS=Homo sapiens]	no	no	Yes	16	3	9	4	4	16	proline biosynthetic process, cellular amino acid biosynthetic process, cellular response to oxidative stress, regulation of mitochondrial membrane potential, oxidation-reduction process, L-proline biosynthetic process, negative regulation of hydrogen peroxide-induced cell death,
	37	MRPL57	Q9BQC6	Ribosomal protein 63, mitochondrial [OS=Homo sapiens]	no	no	Yes	6	1	9	2	2	15	translation, mitochondrial translation,
	38	PINK1	Q9BXM7-1	Serine/threonine-protein kinase PINK1, mitochondrial [OS=Homo sapiens]	no	no	Yes	13	5	5	3	3	6	mitophagy, positive regulation of protein phosphorylation, regulation of oxidative phosphorylation, protein phosphorylation, ubiquitin-dependent protein catabolic process, response to stress, response to oxidative stress, mitochondrion organization, regulation of hydrogen peroxide metabolic process, negative regulation of gene expression, regulation of mitochondrion organization, positive regulat…
	39	SDHAF1	A6NFY7	succinate dehydrogenase assembly factor 1, mitochondrial [OS=Homo sapiens]	no	Yes	Yes	7	1	30	4	4	31	mitochondrial respiratory chain complex II assembly,
	40	MTERF2	Q49AM1	Transcription termination factor 2, mitochondrial [OS=Homo sapiens]	no	no	Yes	8	6	12	3	3	5	transcription, DNA-templated, regulation of transcription, DNA-templated, termination of mitochondrial transcription,
	41	SLC25A1	P53007	Tricarboxylate transport protein, mitochondrial [OS=Homo sapiens]	no	no	Yes	15	12	18	3	3	11	gluconeogenesis, translation, transport, citrate transport, long-chain fatty-acyl-CoA biosynthetic process, tricarboxylic acid transmembrane transport,
