# Supplementary material for: Mitochondrial O-GlcNAc Transferase Interacts with and Modifies Many Proteins and Its Up-Regulation Affects Mitochondrial Function and Cellular Energy Homeostasis
Source: Cancers (Basel). 2021 Jun 12;13(12):2956. doi: 10.3390/cancers13122956 (PMC8231590; doi:10.3390/cancers13122956)
Supplement: Supplementary file 1 [file cancers-13-02956-s001.zip › Table S4. Gold list .xls]

## Sheet: Arkusz1
	Accession Number	HumanGeneID	Symbol	Protein name	MitoCarta3.0 Localization	Processes/Function	The humanO-GlcNAc Database v 1.2
							Identified	O-GlcNAc sites	Phosphorylation sites
1	P82650	56945	MRPS22	28S ribosomal protein S22, mitochondrial OS=Homo sapiens GN=MRPS22 PE=1 SV=1	Matrix	Mitochondrial translation initiation; Mitochondrial translation elongation; Mitochondrial translation termination	N/A
2	Q9BYD1	28998	MRPL13	39S ribosomal protein L13, mitochondrial [OS=Homo sapiens]	Matrix	translation, mitochondrial translational elongation, mitochondrial translational termination,	✓
3	Q9NX20	54948	MRPL16	39S ribosomal protein L16, mitochondrial OS=Homo sapiens GN=MRPL16 PE=1 SV=1	Matrix	Mitochondrial translation initiation; Mitochondrial translation elongation; Mitochondrial translation termination	✓
4	Q9BYC9	55052	MRPL20	39S ribosomal protein L20, mitochondrial OS=Homo sapiens GN=MRPL20 PE=1 SV=1	Matrix	Mitochondrial translation initiation; Mitochondrial translation elongation; Mitochondrial translation termination	N/A
5	Q9NWU5	29093	MRPL22	39S ribosomal protein L22, mitochondrial [OS=Homo sapiens]	Matrix	translation, mitochondrial translational elongation, mitochondrial translational termination,	✓
6	Q96A35	79590	MRPL24	39S ribosomal protein L24, mitochondrial OS=Homo sapiens GN=MRPL24 PE=1 SV=1	Matrix	Mitochondrial translation initiation; Mitochondrial translation elongation; Mitochondrial translation termination	✓		S24
7	Q13084	10573	MRPL28	39S ribosomal protein L28, mitochondrial OS=Homo sapiens GN=MRPL28 PE=1 SV=4	Matrix	Mitochondrial translation initiation; Mitochondrial translation elongation; Mitochondrial translation termination	✓
8	Q9BZE1	51253	MRPL37	39S ribosomal protein L37, mitochondrial OS=Homo sapiens GN=MRPL37 PE=1 SV=2	Matrix	Mitochondrial translation initiation; Mitochondrial translation elongation; Mitochondrial translation termination	✓
9	Q96DV4	64978	MRPL38	39S ribosomal protein L38, mitochondrial OS=Homo sapiens GN=MRPL38 PE=1 SV=2	Matrix	Mitochondrial translation initiation; Mitochondrial translation elongation; Mitochondrial translation termination	✓
10	Q9Y6G3	28977	MRPL42	39S ribosomal protein L42, mitochondrial [OS=Homo sapiens]	Matrix	translation, mitochondrial translational elongation, mitochondrial translational termination,	✓
11	Q9H2W6	26589	MRPL46	39S ribosomal protein L46, mitochondrial OS=Homo sapiens GN=MRPL46 PE=1 SV=1	Matrix	Mitochondrial translation initiation; Mitochondrial translation elongation; Mitochondrial translation termination	✓
12	O14874	10295	BCKDK	3-methyl-2-oxobutanoate dehydrogenase [lipoamide] kinase, mitochondrial OS=Homo sapiens GN=BCKDK PE=1 SV=2	Matrix	Branched-chain amino acid catabolism	✓		S31;S52;S356;S360
13	Q9NWU1-1	54995	OXSM	3-oxoacyl-[acyl-carrier-protein] synthase, mitochondrial [OS=Homo sapiens]	Matrix	fatty acid biosynthetic process, acyl-CoA metabolic process, metabolic process, short-chain fatty acid biosynthetic process, medium-chain fatty acid biosynthetic process,	N/A
14	Q9H845	28976	ACAD9	Acyl-CoA dehydrogenase family member 9, mitochondrial OS=Homo sapiens GN=ACAD9 PE=1 SV=1	MIM	mitochondrial respiratory chain complex I assembly; long-chain fatty acid metabolic process	N/A
15	Q53H12	55750	AGK	Acylglycerol kinase, mitochondrial OS=Homo sapiens GN=AGK PE=1 SV=2	MIM	Glycerophospholipid biosynthesis	N/A
16	P54819	204	AK2	Adenylate kinase 2, mitochondrial OS=Homo sapiens GN=AK2 PE=1 SV=2	IMS	ATP, AMP metabolic, ADP biosynthesis	✓	S4	S4;S58;S133;T195
17	P27144	205	AK4	Adenylate kinase 4, mitochondrial OS=Homo sapiens GN=AK4 PE=1 SV=1	Matrix	Metabolic pathways; Purine metabolism; Thiamine metabolism	N/A
18	Q5TEU4	79133	NDUFAF5	Arginine-hydroxylase NDUFAF5, mitochondrial OS=Homo sapiens GN=NDUFAF5 PE=1 SV=1	MIM	mitochondrial respiratory chain complex I assembly	N/A
19	Q5TC12-1	64756	ATPAF1	ATP synthase mitochondrial F1 complex assembly factor 1 [OS=Homo sapiens]	Matrix	protein complex assembly, mitochondrial proton-transporting ATP synthase complex assembly,	✓
20	Q8N5M1	91647	ATPAF2	ATP synthase mitochondrial F1 complex assembly factor 2 OS=Homo sapiens GN=ATPAF2 PE=1 SV=1	Matrix	proton-transporting ATP synthase complex assembly	N/A
21	O15382	587	BCAT2	Branched-chain-amino-acid aminotransferase, mitochondrial OS=Homo sapiens GN=BCAT2 PE=1 SV=2	Matrix	Amino-acid biosynthesis, Branched-chain amino acid biosynthesis	N/A
22	Q8NE86	90550	MCU	Calcium uniporter protein, mitochondrial OS=Homo sapiens GN=MCU PE=1 SV=1	MIM	Calcium transport, Ion transport, Transport	✓		S57;S92
23	O75390	1431	CS	Citrate synthase, mitochondrial OS=Homo sapiens GN=CS PE=1 SV=2	Matrix	Amino Acid metabolism; TCA Cycle	✓
24	Q9NPL8	51300	TIMMDC1	Complex I assembly factor TIMMDC1, mitochondrial OS=Homo sapiens GN=TIMMDC1 PE=1 SV=2	MIM	mitochondrial respiratory chain complex I assembly	N/A
25	Q9Y375	51103	NDUFAF1	Complex I intermediate-associated protein 30, mitochondrial OS=Homo sapiens GN=NDUFAF1 PE=1 SV=2	MIM	Complex I biogenesis	N/A
26	P12532	_	CKMT1A	Creatine kinase U-type, mitochondrial OS=Homo sapiens GN=CKMT1A PE=1 SV=1	_	Creatine metabolism	N/A
27	P31930	7384	UQCRC1	Cytochrome b-c1 complex subunit 1, mitochondrial OS=Homo sapiens GN=UQCRC1 PE=1 SV=3	MIM	Electron Transport Chain	✓		S212
28	P22695	7385	UQCRC2	Cytochrome b-c1 complex subunit 2, mitochondrial OS=Homo sapiens GN=UQCRC2 PE=1 SV=3	MIM	Electron Transport Chain	✓	S367;T369
29	Q02338	622	BDH1	D-beta-hydroxybutyrate dehydrogenase, mitochondrial OS=Homo sapiens GN=BDH1 PE=1 SV=3	MIM	Synthesis and Degradation of Ketone Bodies	N/A
30	P43897	10102	TSFM	Elongation factor Ts, mitochondrial [OS=Homo sapiens]	Matrix	translational elongation, regulation of DNA-templated transcription, elongation, mitochondrial translational elongation,	✓		S270;T324
31	P42126	1632	ECI1	Enoyl-CoA delta isomerase 1, mitochondrial OS=Homo sapiens GN=ECI1 PE=1 SV=1	Matrix	Fatty acid beta-oxidation	✓
32	P30084	1892	ECHS1	Enoyl-CoA hydratase, mitochondrial OS=Homo sapiens GN=ECHS1 PE=1 SV=4	Matrix	Fatty Acid Beta Oxidation; Fatty Acid Biosynthesis; Tryptophan metabolism	N/A
33	Q9BQ95	51295	ECSIT	Evolutionarily conserved signaling intermediate in Toll pathway, mitochondrial OS=Homo sapiens GN=ECSIT PE=1 SV=1	MIM	MAPK signaling pathway; IL-1 signaling pathway	N/A
34	P49448	2747	GLUD2	Glutamate dehydrogenase 2, mitochondrial OS=Homo sapiens GN=GLUD2 PE=1 SV=2	Matrix	Transcriptional activation of mitochondrial biogenesis; Glutamate and glutamine metabolism	N/A
35	O75879	5188	GATB	Glutamyl-tRNA(Gln) amidotransferase subunit B, mitochondrial OS=Homo sapiens GN=GATB PE=1 SV=1	Matrix	Protein biosynthesis	N/A
36	Q9NS18	51022	GLRX2	Glutaredoxin-2, mitochondrial [OS=Homo sapiens]	Matrix	regulation of transcription, DNA-templated, glutathione metabolic process, apoptotic process, aging, response to temperature stimulus, regulation of signal transduction, response to organic substance, cell differentiation, DNA protection, response to hydrogen peroxide, cell redox homeostasis, response to redox state, oxidation-reduction process, cellular response to superoxide,	N/A
37	Q9HAV7	80273	GRPEL1	GrpE protein homolog 1, mitochondrial OS=Homo sapiens GN=GRPEL1 PE=1 SV=2	Matrix	protein import into mitochondrial matrix	✓
38	Q9BX68	84681	HINT2	Histidine triad nucleotide-binding protein 2, mitochondrial OS=Homo sapiens GN=HINT2 PE=1 SV=1	Matrix	Apoptosis, Lipid biosynthesis, Lipid metabolism, Steroid biosynthesis	N/A
39	P35914	3155	HMGCL	Hydroxymethylglutaryl-CoA lyase, mitochondrial OS=Homo sapiens GN=HMGCL PE=1 SV=2	Matrix	Fatty acid/ketone metabolism	✓
40	Q9H1K1	23479	ISCU	Iron-sulfur cluster assembly enzyme ISCU, mitochondrial [OS=Homo sapiens]	Matrix	cellular iron ion homeostasis, nitrogen fixation, iron-sulfur cluster assembly, small molecule metabolic process, [2Fe-2S] cluster assembly, protein maturation by iron-sulfur cluster transfer,	✓
41	P12694-2	593	BCKDHA	Isoform 2 of 2-oxoisovalerate dehydrogenase subunit alpha, mitochondrial [OS=Homo sapiens]	MIM	branched-chain amino acid catabolic process, glyoxylate metabolic process, oxidation-reduction process,	N/A
42	Q8TCC3-2	51263	MRPL30	Isoform 2 of 39S ribosomal protein L30, mitochondrial OS=Homo sapiens GN=MRPL30	Matrix	Mitochondrial translation initiation; Mitochondrial translation elongation; Mitochondrial translation termination	✓
43	Q8NI60-2	56997	COQ8A	Isoform 2 of Atypical kinase COQ8A, mitochondrial [OS=Homo sapiens]	MIM	protein phosphorylation, ubiquinone biosynthetic process, phosphorylation,	N/A
44	O95258-2	9016	SLC25A14	Isoform 2 of Brain mitochondrial carrier protein 1 [OS=Homo sapiens]	MIM	translation, transport, mitochondrial transport, aerobic respiration, proton transport,	N/A
45	Q9H8M1-2	80219	COQ10B	Isoform 2 of Coenzyme Q-binding protein COQ10 homolog B, mitochondrial [OS=Homo sapiens]	MIM	ubiquinone biosynthetic process, cellular respiration,	✓	T137;S138
46	O95299-2	4705	NDUFA10	Isoform 2 of NADH dehydrogenase [ubiquinone] 1 alpha subcomplex subunit 10, mitochondrial OS=Homo sapiens GN=NDUFA10	MIM	Electron transport; Respiratory Chain	N/A
47	O75306-2	4720	NDUFS2	Isoform 2 of NADH dehydrogenase [ubiquinone] iron-sulfur protein 2, mitochondrial [OS=Homo sapiens]	MIM	mitochondrial electron transport, NADH to ubiquinone, response to oxidative stress, mitochondrial respiratory chain complex I assembly,	N/A
48	O75251-2	374291	NDUFS7	Isoform 2 of NADH dehydrogenase [ubiquinone] iron-sulfur protein 7, mitochondrial [OS=Homo sapiens]	MIM	mitochondrial electron transport, NADH to ubiquinone, mitochondrial respiratory chain complex I assembly, oxidation-reduction process,	✓
49	Q5JPH6-2	124454	EARS2	Isoform 2 of Probable glutamate--tRNA ligase, mitochondrial OS=Homo sapiens GN=EARS2	Matrix	Mitochondrial tRNA aminoacylation	N/A
50	Q12887-2	1352	COX10	Isoform 2 of Protoheme IX farnesyltransferase, mitochondrial [OS=Homo sapiens]	MIM	mitochondrial fission, mitochondrial electron transport, cytochrome c to oxygen, heme biosynthetic process, heme a biosynthetic process, respiratory chain complex IV assembly, aerobic respiration, cellular respiration, heme O biosynthetic process, hydrogen ion transmembrane transport,	N/A
51	Q9GZT3-2	81892	SLIRP	Isoform 2 of SRA stem-loop-interacting RNA-binding protein, mitochondrial [OS=Homo sapiens]	Matrix	negative regulation of mitochondrial RNA catabolic process, transcription, DNA-templated, regulation of transcription, DNA-templated, spermatid development, single fertilization, sperm motility, mitochondrion morphogenesis,	✓		S15;T101;S102
52	P31040-2	6389	SDHA	Isoform 2 of Succinate dehydrogenase [ubiquinone] flavoprotein subunit, mitochondrial [OS=Homo sapiens]	MIM	tricarboxylic acid cycle, succinate metabolic process, mitochondrial electron transport, succinate to ubiquinone, nervous system development, anaerobic respiration, electron transport chain, respiratory electron transport chain oxidation-reduction process,	✓		T215
53	Q8IYJ2-2	_	C10orf67	Isoform 2 of Uncharacterized protein C10orf67, mitochondrial [OS=Homo sapiens]	_	mitochondrion organization, small GTPase mediated signal transduction, cellular homeostasis, mitochondrion transport along microtubule, regulation of small GTPase mediated signal transduction, mitochondrial outer membrane permeabilization,	✓
54	Q9Y277-2	7419	VDAC3	Isoform 2 of Voltage-dependent anion-selective channel protein 3 OS=Homo sapiens GN=VDAC3	MOM	voltage-gated anion channel activity	✓		T4;S241
55	Q96CM8-3	80221	ACSF2	Isoform 3 of Acyl-CoA synthetase family member 2, mitochondrial [OS=Homo sapiens]	Matrix	fatty acid metabolic process, metabolic process, long-chain fatty-acyl-CoA biosynthetic process,	✓	T417
56	O94925-3	2744	GLS	Isoform 3 of Glutaminase kidney isoform, mitochondrial OS=Homo sapiens GN=GLS	MIM	cellular amino acid biosynthetic process	✓		S652
57	Q9H7H0-3	64745	METTL17	Isoform 3 of Methyltransferase-like protein 17, mitochondrial [OS=Homo sapiens]	Matrix	translation, respiratory chain complex IV assembly, aerobic respiration, methylation,	N/A
58	P49748-3	37	ACADVL	Isoform 3 of Very long-chain specific acyl-CoA dehydrogenase, mitochondrial OS=Homo sapiens GN=ACADVL	MIM	Fatty Acid Beta Oxidation	✓		S517;S522
59	P00390-5	2936	GSR	Isoform 4 of Glutathione reductase, mitochondrial [OS=Homo sapiens]	Matrix	response to reactive oxygen species, glutathione metabolic process, nucleobase-containing small molecule interconversion, cell redox homeostasis oxidation-reduction process, cellular oxidant detoxification,	✓
60	Q9HD23-4	57380	MRS2	Isoform 4 of Magnesium transporter MRS2 homolog, mitochondrial OS=Homo sapiens GN=MRS2	MIM	Miscellaneous transport and binding events	N/A
61	Q969Y2-4	84705	GTPBP3	Isoform 4 of tRNA modification GTPase GTPBP3, mitochondrial [OS=Homo sapiens]	Matrix	tRNA wobble uridine modification, tRNA methylation,	✓
62	Q8IXI2-7	55288	RHOT1	Isoform 7 of Mitochondrial Rho GTPase 1 [OS=Homo sapiens]	MOM	mitochondrion organization, small GTPase mediated signal transduction, cellular homeostasis, mitochondrion transport along microtubule, regulation of small GTPase mediated signal transduction, mitochondrial outer membrane permeabilization,	N/A
63	Q9NVH6-8	55217	TMLHE	Isoform 8 of Trimethyllysine dioxygenase, mitochondrial OS=Homo sapiens GN=TMLHE	Matrix	carnitine biosynthesis	N/A
64	Q15046-2	3735	KARS1	Isoform Mitochondrial of Lysine--tRNA ligase OS=Homo sapiens GN=KARS	Matrix	Selenoamino acid metabolism; Cytosolic tRNA aminoacylation; Mitochondrial tRNA aminoacylation	N/A
65	Q9HD34	57128	LYRM4	LYR motif-containing protein 4 OS=Homo sapiens GN=LYRM4 PE=1 SV=1	Matrix	Mitochondrial iron-sulfur cluster biogenesis	N/A
66	O95822	23417	MLYCD	Malonyl-CoA decarboxylase, mitochondrial OS=Homo sapiens GN=MLYCD PE=1 SV=3	Matrix	Fatty acid biosynthesis, Fatty acid metabolism, Lipid biosynthesis, Lipid metabolism	✓	T9
67	Q9Y3D2	22921	MSRB2	Methionine-R-sulfoxide reductase B2, mitochondrial OS=Homo sapiens GN=MSRB2 PE=1 SV=2	Matrix	Protein repair	N/A
68	Q96RQ3	56922	MCCC1	Methylcrotonoyl-CoA carboxylase subunit alpha, mitochondrial OS=Homo sapiens GN=MCCC1 PE=1 SV=3	Matrix	Branched-chain amino acid catabolism	✓	T418
69	Q13825	549	AUH	Methylglutaconyl-CoA hydratase, mitochondrial OS=Homo sapiens GN=AUH PE=1 SV=1	Matrix	Branched-chain amino acid catabolism	N/A
70	Q02252	4329	ALDH6A1	Methylmalonate-semialdehyde dehydrogenase [acylating], mitochondrial OS=Homo sapiens GN=ALDH6A1 PE=1 SV=2	MIM	Branched-chain amino acid catabolism	✓		S262;S380
71	Q8N2A8	201164	PLD6	mitochondrial cardiolipin hydrolase [OS=Homo sapiens]	MOM	meiotic nuclear division, spermatid development, mitochondrial fusion, positive regulation of mitochondrial fusion, lipid catabolic process, P granule organization, cardiolipin biosynthetic process, piRNA metabolic process, DNA methylation involved in gamete generation, RNA phosphodiester bond hydrolysis, endonucleolytic,	N/A
72	Q9Y6C9	23788	MTCH2	Mitochondrial carrier homolog 2 OS=Homo sapiens GN=MTCH2 PE=1 SV=1	MOM	apoptosis	N/A
73	Q9NQG6	54471	MIEF1	Mitochondrial dynamics protein MID51 [OS=Homo sapiens]	MOM|Matrix	anatomical structure morphogenesis, mitochondrial translational elongation, mitochondrial translational termination,	N/A
74	Q9H936	79751	SLC25A22	Mitochondrial glutamate carrier 1 OS=Homo sapiens GN=SLC25A22 PE=1 SV=1	MIM	aspartate transmembrane transport; ion transport; L-glutamate transmembrane transport; malate-aspartate shuttle	✓
75	Q99595	10440	TIMM17A	Mitochondrial import inner membrane translocase subunit Tim17-A [OS=Homo sapiens]	MIM	protein targeting to mitochondrion, intracellular protein transport, protein import into mitochondrial matrix,	N/A
76	Q9Y584	29928	TIMM22	Mitochondrial import inner membrane translocase subunit TIM22 [OS=Homo sapiens]	MIM	protein targeting to mitochondrion, protein import into mitochondrial inner membrane,	N/A
77	Q9BSF4	90580	TIMM29	Mitochondrial import inner membrane translocase subunit Tim29 OS=Homo sapiens GN=TIMM29 PE=1 SV=2	MIM	protein insertion into mitochondrial inner membrane	N/A
78	O43615	10469	TIMM44	Mitochondrial import inner membrane translocase subunit TIM44 OS=Homo sapiens GN=TIMM44 PE=1 SV=2	MIM	Mitochondrial protein import	N/A
79	O60220	1678	TIMM8A	Mitochondrial import inner membrane translocase subunit Tim8 A [OS=Homo sapiens]	MIM	nervous system development, chaperone-mediated protein transport,	✓		S57;S87;S94;S96
80	Q96B49	100188893	TOMM6	Mitochondrial import receptor subunit TOM6 homolog [OS=Homo sapiens]	MOM	protein transport, macroautophagy,	✓	S9;S13
81	Q9HC21	60386	SLC25A19	Mitochondrial thiamine pyrophosphate carrier [OS=Homo sapiens]	MIM	translation, transport, deoxynucleotide transport, transmembrane transport,	✓		S51
82	Q9NUJ1	55347	ABHD10	Mycophenolic acid acyl-glucuronide esterase, mitochondrial OS=Homo sapiens GN=ABHD10 PE=1 SV=1	Matrix	Glucuronidation	✓
83	Q4G0N4	133686	NADK2	NAD kinase 2, mitochondrial OS=Homo sapiens GN=NADK2 PE=1 SV=2	Matrix	NADP biosynthetic process	N/A
84	Q9Y6E7	23409	SIRT4	NAD-dependent protein lipoamidase sirtuin-4, mitochondrial [OS=Homo sapiens]	Matrix	regulation of glutamine family amino acid metabolic process, chromatin silencing, protein ADP-ribosylation, glutamine metabolic process, cellular response to DNA damage stimulus, negative regulation of cardiac muscle cell apoptotic process, peptidyl-lysine deacetylation, negative regulation of fatty acid oxidation, negative regulation of insulin secretion, positive regulation of lipid biosyntheti…	N/A
85	O43676	4709	NDUFB3	NADH dehydrogenase [ubiquinone] 1 beta subcomplex subunit 3 OS=Homo sapiens GN=NDUFB3 PE=1 SV=3	MIM	Respiratory electron transport; Complex I biogenesis	N/A
86	O43674-1	4711	NDUFB5	NADH dehydrogenase [ubiquinone] 1 beta subcomplex subunit 5, mitochondrial [OS=Homo sapiens]	MIM	mitochondrial electron transport, NADH to ubiquinone, mitochondrial respiratory chain complex I assembly,	✓
87	O75489	4722	NDUFS3	NADH dehydrogenase [ubiquinone] iron-sulfur protein 3, mitochondrial OS=Homo sapiens GN=NDUFS3 PE=1 SV=1	MIM	Respiratory electron transport; Complex I biogenesis	✓	T21
88	O00217	4728	NDUFS8	NADH dehydrogenase [ubiquinone] iron-sulfur protein 8, mitochondrial OS=Homo sapiens GN=NDUFS8 PE=1 SV=1	MIM	Electron transport, Respiratory chain, Transport	✓
89	P36551	1371	CPOX	Oxygen-dependent coproporphyrinogen-III oxidase, mitochondrial OS=Homo sapiens GN=CPOX PE=1 SV=3	MIM	protoporphyrin-IX biosynthesis;	✓		S112
90	O95571	23474	ETHE1	Persulfide dioxygenase ETHE1, mitochondrial OS=Homo sapiens GN=ETHE1 PE=1 SV=2	Matrix	glutathione metabolic process;	N/A
91	Q5T160	57038	RARS2	Probable arginine--tRNA ligase, mitochondrial OS=Homo sapiens GN=RARS2 PE=1 SV=1	Matrix	Mitochondrial tRNA aminoacylation	✓	S57
92	Q86WU2	197257	LDHD	Probable D-lactate dehydrogenase, mitochondrial OS=Homo sapiens GN=LDHD PE=1 SV=1	MIM	lactate catabolic process	N/A
93	O75880	6341	SCO1	Protein SCO1 homolog, mitochondrial OS=Homo sapiens GN=SCO1 PE=1 SV=1	MIM	Electron Transport Chain; Copper homeostasis	N/A
94	Q5T440	200205	IBA57	Putative transferase CAF17, mitochondrial OS=Homo sapiens GN=IBA57 PE=1 SV=1	Matrix	Heme biosynthesis	N/A
95	Q15118	5163	PDK1	Pyruvate dehydrogenase (acetyl-transferring) kinase isozyme 1, mitochondrial OS=Homo sapiens GN=PDK1 PE=1 SV=1	Matrix	#N/A	N/A
96	P11177	5162	PDHB	Pyruvate dehydrogenase E1 component subunit beta, mitochondrial OS=Homo sapiens GN=PDHB PE=1 SV=3	Matrix	Glycolysis and Gluconeogenesis; Tricarboxylic acid cycle	✓	S5;S282	T67
97	Q9HA92	55316	RSAD1	Radical S-adenosyl methionine domain-containing protein 1, mitochondrial [OS=Homo sapiens]	MIM	porphyrin-containing compound biosynthetic process, oxidation-reduction process,	N/A
98	P34897-1	6472	SHMT2	Serine hydroxymethyltransferase, mitochondrial [OS=Homo sapiens]	Matrix	glycine metabolic process, L-serine metabolic process, L-serine biosynthetic process, one-carbon metabolic process, positive regulation of cell proliferation, glycine biosynthetic process from serine, response to type I interferon, tetrahydrofolate interconversion, tetrahydrofolate metabolic process, folic acid metabolic process, protein tetramerization, protein homotetramerization, protein K63-l…	✓		S470
99	Q04837	6742	SSBP1	Single-stranded DNA-binding protein, mitochondrial OS=Homo sapiens GN=SSBP1 PE=1 SV=1	Matrix	mitochondrial DNA replication	✓		S67;S79
100	Q9UJZ1	30968	STOML2	Stomatin-like protein 2, mitochondrial OS=Homo sapiens GN=STOML2 PE=1 SV=1	MIM	Regulator of Biogenesis and activity of mitochondria	✓		S17;T124;T327;S330
101	A6NFY7	644096	SDHAF1	succinate dehydrogenase assembly factor 1, mitochondrial [OS=Homo sapiens]	Matrix	mitochondrial respiratory chain complex II assembly,	N/A
102	Q99643	6391	SDHC	Succinate dehydrogenase cytochrome b560 subunit, mitochondrial [OS=Homo sapiens]	MIM	tricarboxylic acid cycle, mitochondrial electron transport, succinate to ubiquinone, erobic respiration, oxidation-reduction process,	N/A
103	P30048	10935	PRDX3	Thioredoxin-dependent peroxide reductase, mitochondrial OS=Homo sapiens GN=PRDX3 PE=1 SV=3	Matrix	cell redox homeostasis; negative regulation of apoptotic process; response to hydrogen peroxide; response to lipopolysaccharide; response to oxidative stress	✓		T146
104	Q9BW92	80222	TARS2	Threonine--tRNA ligase, mitochondrial OS=Homo sapiens GN=TARS2 PE=1 SV=1	Matrix	Mitochondrial tRNA aminoacylation; Protein biosynthesis	✓		S52
105	Q8N442	60558	GUF1	translation factor GUF1, mitochondrial [OS=Homo sapiens]	Matrix	translation, positive regulation of translation,	N/A
106	P17152	8834	TMEM11	Transmembrane protein 11, mitochondrial OS=Homo sapiens GN=TMEM11 PE=1 SV=1	MIM	inner mitochondrial membrane organization	N/A
107	Q9Y2Z4	51067	YARS2	Tyrosine--tRNA ligase, mitochondrial OS=Homo sapiens GN=YARS2 PE=1 SV=2	Matrix	Protein biosynthesis	✓	T354
