# Supplementary material for: Mitochondrial O-GlcNAc Transferase Interacts with and Modifies Many Proteins and Its Up-Regulation Affects Mitochondrial Function and Cellular Energy Homeostasis
Source: Cancers (Basel). 2021 Jun 12;13(12):2956. doi: 10.3390/cancers13122956 (PMC8231590; doi:10.3390/cancers13122956)
Supplement: Supplementary file 1 [file cancers-13-02956-s001.zip › Table S5. Nuclear candidates.xls]

## Sheet: Arkusz1
										HaloLink® Resin; pmOGT-HaloTag vs pHaloTag treatment			IP RL2; mOGT-HaloTag vs pHaloTag treatment
	Cell Line		Gene	Accession Number	Co-existence	Protein name				Peptides	Unique peptides	Coverage (%)	Peptides	Unique peptides	Coverage (%)
	MDA-MB-231		ACIN1	Q9UKV3-5	yes	Isoform 4 of Apoptotic chromatin condensation inducer in the nucleus [OS=Homo sapiens]				16	16	28	10	10	11
			NFATC4	Q14934-6		Isoform 6 of Nuclear factor of activated T-cells, cytoplasmic 4 [OS=Homo sapiens]				13	13	19	8	8	10
			MYT1L	Q9UL68-2		Isoform 2 of Myelin transcription factor 1-like protein [OS=Homo sapiens]				14	14	25	6	6	11
			CNOT10	Q9H9A5-6		Isoform 6 of CCR4-NOT transcription complex subunit 10 [OS=Homo sapiens]				20	20	20	6	4	15
			DNMT3B	Q9UBC3-6		Isoform 6 of DNA (cytosine-5)-methyltransferase 3B [OS=Homo sapiens]				11	11	10	5	5	9
			NFRKB	Q6P4R8-2		Isoform 2 of Nuclear factor related to kappa-B-binding protein [OS=Homo sapiens]				10	10	7	3	3	6
			RUNX1	Q01196-11	yes	Isoform AML-1L of Runt-related transcription factor 1 [OS=Homo sapiens]				19	19	27	3	3	6
			RFX8	Q6ZV50-3		Isoform 3 of DNA-binding protein RFX8 [OS=Homo sapiens]				13	13	29	3	3	11
			RAD51	Q06609		DNA repair protein RAD51 homolog 1 [OS=Homo sapiens]				11	11	23	3	3	10
			CTCFL	Q8NI51-10	yes	Isoform 10 of Transcriptional repressor CTCFL [OS=Homo sapiens]				8	8	13	8	7	15
			TBX2	Q13207		T-box transcription factor TBX2 [OS=Homo sapiens]				9	9	29	6	6	9
			NRBF2	Q96F24-1		Nuclear receptor-binding factor 2 [OS=Homo sapiens]				21	21	34	5	5	24
			SNRNP25	Q9BV90		U11/U12 small nuclear ribonucleoprotein 25 kDa protein [OS=Homo sapiens]				7	7	17	3	3	16
			JUN	P05412		transcription factor AP-1 [OS=Homo sapiens]				11	11	35	3	3	11
			CENPBD1	B2RD01		CENPB DNA-binding domain-containing protein 1 [OS=Homo sapiens]				18	18	40	3	3	14
			DNAJC9	Q8WXX5		dnaJ homolog subfamily C member 9 [OS=Homo sapiens]				9	9	9	6	6	15
			NFIC	P08651		Nuclear factor 1 C-type [OS=Homo sapiens]				15	15	40	5	5	9
			NFYA	P23511		Nuclear transcription factor Y subunit alpha [OS=Homo sapiens]				32	32	6	4	4	14
			TC2N	Q8N9U0		Tandem C2 domains nuclear protein [OS=Homo sapiens]				12	12	18	3	3	11
			TBX5	Q99593		T-box transcription factor TBX5 [OS=Homo sapiens]				11	11	21	3	3	5
			ID4	P47928		DNA-binding protein inhibitor ID-4 [OS=Homo sapiens]				11	11	16	3	3	17
			DDB2	Q92466		DNA damage-binding protein 2 [OS=Homo sapiens]				25	25	13	3	3	11
			NR1D1	P20393		nuclear receptor subfamily 1 group D member 1 [OS=Homo sapiens]				9	9	7	7	7	8
			POLR3H	Q9Y535		DNA-directed RNA polymerase III subunit RPC8 [OS=Homo sapiens]				9	9	40	5	5	33
			NFATC1	O95644-1	yes	Nuclear factor of activated T-cells, cytoplasmic 1 [OS=Homo sapiens]				13	13	16	3	3	3
			STAT4	Q14765		Signal transducer and activator of transcription 4 [OS=Homo sapiens]				20	20	11	6	6	9
			RFX5	P48382		DNA-binding protein RFX5 [OS=Homo sapiens]				13	13	17	11	11	14
			ERG	P11308-1		Isoform ERG-2 of Transcriptional regulator ERG [OS=Homo sapiens]				10	10	31	7	7	15
			SNRPA	P09012		U1 SMALL NUCLEAR RIBONUCLEOPROTEIN A [OS=Homo sapiens]				16	16	38	3	3	11
			NKX1-2	Q9UD57	yes	NK1 transcription factor-related protein 2 [OS=Homo sapiens]				16	16	51	3	3	12
			CHD1	O14646-2	yes	Isoform 2 of Chromodomain-helicase-DNA-binding protein 1 [OS=Homo sapiens]				16	16	11	17	17	11
	Hs578t		CNOT1	A5YKK6-2		Isoform 2 of CCR4-NOT transcription complex subunit 1 [OS=Homo sapiens]				21	21	16	6	5	26
			TRPS1	Q9UHF7-2		Isoform 2 of Zinc finger transcription factor Trps1 [OS=Homo sapiens]				16	16	16	7	7	10
			TINF2	Q9BSI4		TERF1-interacting nuclear factor 2 [OS=Homo sapiens]				13	13	7	5	5	12
			ERG	P11308-6		Isoform 8 of Transcriptional regulator ERG [OS=Homo sapiens]				12	12	26	8	7	12
			RAD51	Q06609-4		Isoform 4 of DNA repair protein RAD51 homolog 1 [OS=Homo sapiens]				12	12	26	6	6	5
			CHD2	O14647-2		Isoform 2 of Chromodomain-helicase-DNA-binding protein 2 [OS=Homo sapiens]				12	12	65	5	5	37
			NUP153	P49790-3		Isoform 3 of Nuclear pore complex protein Nup153 [OS=Homo sapiens]				8	8	5	10	9	27
			DNAJB6	O75190		DnaJ homolog subfamily B member 6 [OS=Homo sapiens]				31	31	51	5	4	51
			PIF1	Q9H611-3		Isoform 3 of ATP-dependent DNA helicase PIF1 [OS=Homo sapiens]				9	9	11	5	5	8
			MLH1	P40692-1		DNA mismatch repair protein MLH1 [OS=Homo sapiens]				35	35	6	6	6	9
			TFAP4	Q01664		Transcription factor AP-4 [OS=Homo sapiens]				13	13	17	6	5	12
			RUNX1	Q01196-11	yes	Isoform AML-1L of Runt-related transcription factor 1 [OS=Homo sapiens]				11	11	9	5	4	7
			PPP1R8	Q12972-1		Nuclear inhibitor of protein phosphatase 1 [OS=Homo sapiens]				23	23	19	5	5	18
			CTCFL	Q8NI51-10	yes	Isoform 10 of Transcriptional repressor CTCFL [OS=Homo sapiens]				15	15	12	6	4	17
			NR2E1	Q9Y466		Nuclear receptor subfamily 2 group E member 1 [OS=Homo sapiens]				14	14	15	7	7	6
			NKX1-2	Q9UD57	yes	NK1 transcription factor-related protein 2 [OS=Homo sapiens]				13	13	22	8	6	31
			NFIB	O00712-4		Isoform 4 of Nuclear factor 1 B-type [OS=Homo sapiens]				13	13	30	5	5	16
			NFATC1	O95644-1	yes	Nuclear factor of activated T-cells, cytoplasmic 1 [OS=Homo sapiens]				10	10	3	5	5	15
			CNOT9	Q92600		CCR4-NOT transcription complex subunit 9 [OS=Homo sapiens]				8	8	11	5	5	12
			CNOT7	Q9UIV1-1		CCR4-NOT transcription complex subunit 7 [OS=Homo sapiens]				7	7	23	5	5	7
			ACIN1	Q9UKV3-5	yes	Isoform 4 of Apoptotic chromatin condensation inducer in the nucleus [OS=Homo sapiens]				26	26	9	11	6	30
			RPA2	P15927-3		Isoform 3 of Replication protein A 32 kDa subunit [OS=Homo sapiens]				22	22	19	5	4	5
			TCF19	Q9Y242		transcription factor 19 [OS=Homo sapiens]				17	17	9	5	5	17
			TCFL5	Q9UL49-1		Isoform 1 of Transcription factor-like 5 protein [OS=Homo sapiens]				13	13	17	7	7	3
			MSANTD2	Q6P1R3-2		Isoform 2 of Myb/SANT-like DNA-binding domain-containing protein 2 [OS=Homo sapiens]				13	13	19	6	6	5
			HNRNPH2	P55795		heterogeneous nuclear ribonucleoprotein H2 [OS=Homo sapiens]				13	13	11	5	5	8
			ERCC8	Q13216-1		DNA excision repair protein ERCC-8 [OS=Homo sapiens]				9	9	17	7	6	4
			ANP32B	Q92688		Acidic leucine-rich nuclear phosphoprotein 32 family member B [OS=Homo sapiens]				8	8	7	5	5	13
			MSANTD1	Q6ZTZ1		Myb/SANT-like DNA-binding domain-containing protein 1 [OS=Homo sapiens]				25	25	23	9	6	22
			VGLL1	Q99990		Transcription cofactor vestigial-like protein 1 [OS=Homo sapiens]				19	19	12	5	5	11
			NVL	O15381-3		Isoform 3 of Nuclear valosin-containing protein-like [OS=Homo sapiens]				18	18	32	6	4	32
			MCM3	P25205-2		Isoform 2 of DNA replication licensing factor MCM3 [OS=Homo sapiens]				15	15	13	11	11	25
			RORA	P35398-3		Isoform 3 of Nuclear receptor ROR-alpha [OS=Homo sapiens]				12	12	14	9	7	7
			CIART	Q8N365-1		Circadian-associated transcriptional repressor [OS=Homo sapiens]				11	11	15	9	7	16
			GATAD2B	Q8WXI9		Transcriptional repressor p66-beta [OS=Homo sapiens]				17	17	10	7	7	15
			HNRNPA0	Q13151		Heterogeneous nuclear ribonucleoprotein A0 [OS=Homo sapiens]				20	20	11	5	5	11
			EBF1	Q9UH73		Transcription factor COE1 [OS=Homo sapiens]				14	14	10	7	4	31
			HNRNPC	P07910-2		Isoform C1 of Heterogeneous nuclear ribonucleoproteins C1/C2 [OS=Homo sapiens]				8	8	24	13	11	5
			CHD1	O14646-2	yes	Isoform 2 of Chromodomain-helicase-DNA-binding protein 1 [OS=Homo sapiens]				34	34	12	17	15	11
			HNRNPH1	P31943		Heterogeneous nuclear ribonucleoprotein H [OS=Homo sapiens]				21	21	12	9	9	19
			TOP2A	P11388-3		Isoform 3 of DNA topoisomerase 2-alpha [OS=Homo sapiens]				27	27	12	22	9	11
	MCF-7		HIST1H2AB	Q08AJ9		Histone H2A OS=Homo sapiens GN=HIST1H2AB PE=2 SV=1				6	2	21	10	3	35
			HNRNPM	P52272		Heterogeneous nuclear ribonucleoprotein M OS=Homo sapiens GN=HNRNPM PE=1 SV=3				18	18	26	-	-	-
			PURB	Q96QR8		Transcriptional activator protein Pur-beta OS=Homo sapiens GN=PURB PE=1 SV=3				-	-	-	4	4	11
			PCNA	P12004		Proliferating cell nuclear antigen OS=Homo sapiens GN=PCNA PE=1 SV=1				2	2	8	3	3	11
			PURA	Q00577		Transcriptional activator protein Pur-alpha OS=Homo sapiens GN=PURA PE=1 SV=2				-	-	-	3	3	13
			CNOT9	Q92600-2		Isoform 2 of CCR4-NOT transcription complex subunit 9 OS=Homo sapiens GN=CNOT9				-	-	-	3	3	8
			NUDT16L1	Q9BRJ7		Tudor-interacting repair regulator protein OS=Homo sapiens GN=NUDT16L1 PE=1 SV=1				-	-	-	10	10	48
