# Supplementary material for: Mitochondrial O-GlcNAc Transferase Interacts with and Modifies Many Proteins and Its Up-Regulation Affects Mitochondrial Function and Cellular Energy Homeostasis
Source: Cancers (Basel). 2021 Jun 12;13(12):2956. doi: 10.3390/cancers13122956 (PMC8231590; doi:10.3390/cancers13122956)
Supplement: Supplementary file 1 [file cancers-13-02956-s001.zip › Table S6. All mitochondrial Candidates.xls]

## Sheet: MCF-7
								HaloLink® Resin; pmOGT-HaloTag vs pHaloTag treatment			IP RL2; mOGT-HaloTag vs pCDII-mOGT-HaloTag and pHaloTag treatment
					Co-existence
Cell Line	Number	Gene	Accession Number	Protein name	MCF-7	MDA-MB-231	Hs 578t	Peptides	Unique peptides	Coverage (%)	Peptides	Unique peptides	Coverage (%)	Processes/Function
MCF-7	1	COQ5	Q5HYK3	2-methoxy-6-polyprenyl-1,4-benzoquinol methylase, mitochondrial OS=Homo sapiens GN=COQ5 PE=1 SV=2	Yes	no	no	4	4	14	10	9	28	Ubiquinone biosynthesis
	2	OGDH	E9PCR7	2-oxoglutarate dehydrogenase, mitochondrial OS=Homo sapiens GN=OGDH PE=1 SV=1	Yes	no	no	31	25	30	43	38	23	tricarboxylic acid cycle
	3	AK2	P54819	Adenylate kinase 2, mitochondrial OS=Homo sapiens GN=AK2 PE=1 SV=2	Yes	Yes	Yes	9	6	24	19	7	34	ATP, AMP metabolic, ADP biosynthesis
	4	N/A	B4DLN1	cDNA FLJ60124, highly similar to Mitochondrial dicarboxylate carrier OS=Homo sapiens PE=2 SV=1	Yes	no	no	21	2	14	25	18	15	mitochondrial transport
	5	DHRS4	Q9BTZ2	Dehydrogenase/reductase SDR family member 4 OS=Homo sapiens GN=DHRS4 PE=1 SV=3	Yes	no	no	4	4	13	5	5	14	steroid/ ketone metabolic
	6	HMGCL	P35914	Hydroxymethylglutaryl-CoA lyase, mitochondrial OS=Homo sapiens GN=HMGCL PE=1 SV=2	Yes	no	Yes	22	11	36	14	13	21	Fatty acid/ketone metabolism
	7	NDUFA10	O95299-2	Isoform 2 of NADH dehydrogenase [ubiquinone] 1 alpha subcomplex subunit 10, mitochondrial OS=Homo sapiens GN=NDUFA10	Yes	Yes	Yes	4	4	9	6	6	4	Electron transport; Respiratory Chain
	8	ALDH5A1	P51649-2	Isoform 2 of Succinate-semialdehyde dehydrogenase, mitochondrial OS=Homo sapiens GN=ALDH5A1	Yes	no	no	8	8	16	69	49	29	Amino Acid metabolism
	9	ACADVL	P49748-3	Isoform 3 of Very long-chain specific acyl-CoA dehydrogenase, mitochondrial OS=Homo sapiens GN=ACADVL	Yes	no	Yes	19	17	28	99	75	45	Fatty Acid Beta Oxidation
	10	MDH2	A0A024R4K3	Malate dehydrogenase OS=Homo sapiens GN=MDH2 PE=2 SV=1	Yes	no	no	40	18	57	118	78	68	TCA cycle
	11	MTCH2	Q9Y6C9	Mitochondrial carrier homolog 2 OS=Homo sapiens GN=MTCH2 PE=1 SV=1	Yes	Yes	no	33	12	49	22	9	32	apoptosis
	12	MTHFD1L	B7ZM99	MTHFD1L protein OS=Homo sapiens GN=MTHFD1L PE=1 SV=1	Yes	no	no	5	5	6	5	5	5	ATP binding
	13	PHB	A8K401	Prohibitin, isoform CRA_a OS=Homo sapiens GN=PHB PE=2 SV=1	Yes	no	no	19	13	46	30	20	43	DNA biosynthesis
	14	SHMT2	P34897	Serine hydroxymethyltransferase, mitochondrial OS=Homo sapiens GN=SHMT2 PE=1 SV=3	Yes	no	no	11	10	21	73	59	53	Amino Acid metabolism/ Mitochondrial translation
	15	N/A	B4DRS6	Sideroflexin OS=Homo sapiens PE=2 SV=1	Yes	no	no	11	5	20	21	14	32	Ion transport
	16	STOML2	Q9UJZ1	Stomatin-like protein 2, mitochondrial OS=Homo sapiens GN=STOML2 PE=1 SV=1	Yes	no	Yes	7	6	19	16	13	19	Regulator of Biogenesis and activity of mitochondria
	17	TUSC3	Q13454	Tumor suppressor candidate 3 OS=Homo sapiens GN=TUSC3 PE=1 SV=1	Yes	no	no	8	3	14	6	5	11	Ion transport
	18	MRPS25	P82663	28S ribosomal protein S25, mitochondrial OS=Homo sapiens GN=MRPS25 PE=1 SV=1	Yes	no	Yes	10	7	45	-	-	-	Translation
	19	MRPL14	Q6P1L8	39S ribosomal protein L14, mitochondrial OS=Homo sapiens GN=MRPL14 PE=1 SV=1	Yes	Yes	no	5	4	25	-	-	-	translation
	20	ACO2	A2A274	Aconitate hydratase, mitochondrial OS=Homo sapiens GN=ACO2 PE=1 SV=1	Yes	no	no	13	5	11	-	-	-	TCA cycle
	21	CPT2	A0A1B0GVF3	Carnitine O-palmitoyltransferase 2, mitochondrial OS=Homo sapiens GN=CPT2 PE=1 SV=1	Yes	no	no	4	3	5	-	-	-	Fatty Acid Beta Oxidation
	22	N/A	A8K0T9	cDNA FLJ75422, highly similar to Homo sapiens capping protein (actin filament) muscle Z-line, alpha 1, mRNA OS=Homo sapiens PE=2 SV=1	Yes	no	no	9	5	38	-	-	-	Actin-binding
	23	N/A	A8K5G6	cDNA FLJ78646, highly similar to Homo sapiens polymerase (DNA directed), gamma (POLG), mRNA OS=Homo sapiens PE=2 SV=1	Yes	no	no	7	7	7	-	-	-	DNA replication
	24	CYCS	P99999	Cytochrome c OS=Homo sapiens GN=CYCS PE=1 SV=2	Yes	no	no	4	4	32	-	-	-	Apoptosis, Electron transport, Respiratory chain, Transport
	25	COX2	A0A059RUZ1	Cytochrome c oxidase subunit 2 (Fragment) OS=Homo sapiens GN=COX2 PE=3 SV=1	Yes	no	no	7	4	23	-	-	-	Electron transport; Respiratory Chain
	26	DLST	P36957	Dihydrolipoyllysine-residue succinyltransferase component of 2-oxoglutarate dehydrogenase complex, mitochondrial OS=Homo sapiens GN=DLST PE=1 SV=4	Yes	no	no	28	14	40	-	-	-	TCA cycle
	27	ECI1	P42126	Enoyl-CoA delta isomerase 1, mitochondrial OS=Homo sapiens GN=ECI1 PE=1 SV=1	Yes	no	Yes	15	3	13	-	-	-	Fatty acid beta-oxidation
	28	IVD	A0A0A0MT83	Isovaleryl-CoA dehydrogenase, mitochondrial OS=Homo sapiens GN=IVD PE=1 SV=1	Yes	no	no	4	4	8	-	-	-	Fatty acid beta-oxidation
	29	MSRB2	Q9Y3D2	Methionine-R-sulfoxide reductase B2, mitochondrial OS=Homo sapiens GN=MSRB2 PE=1 SV=2	Yes	Yes	Yes	5	4	20	-	-	-	Protein repair
	30	N/A	Q53G34	Mitochondrial carrier homolog 2 variant (Fragment) OS=Homo sapiens PE=2 SV=1	Yes	no	no	22	3	14	-	-	-	transport
	31	N/A	Q53G19	Mitochondrial ribosomal protein L11 isoform a variant (Fragment) OS=Homo sapiens PE=2 SV=1	Yes	no	no	9	2	25	-	-	-	structural constituent of ribosome; translation
	32	NDUFV2	E7EPT4	NADH dehydrogenase [ubiquinone] flavoprotein 2, mitochondrial OS=Homo sapiens GN=NDUFV2 PE=1 SV=1	Yes	no	no	6	3	15	-	-	-	metal ion binding
	33	DHTKD1	Q96HY7	Probable 2-oxoglutarate dehydrogenase E1 component DHKTD1, mitochondrial OS=Homo sapiens GN=DHTKD1 PE=1 SV=2	Yes	no	Yes	14	13	15	-	-	-	Glycolysis; tricarboxylic acid cycle
	34	UQCRFS1P1	P0C7P4	Putative cytochrome b-c1 complex subunit Rieske-like protein 1 OS=Homo sapiens GN=UQCRFS1P1 PE=5 SV=1	Yes	Yes	no	9	2	23	-	-	-	mitochondrial electron transport, ubiquinol to cytochrome c
	35	TMEM126A	Q9H061	Transmembrane protein 126A OS=Homo sapiens GN=TMEM126A PE=1 SV=1	Yes	no	no	9	7	31	-	-	-	mitochondrial respiratory chain complex I assembly
	36	VDAC3	Q9Y277	Voltage-dependent anion-selective channel protein 3 OS=Homo sapiens GN=VDAC3 PE=1 SV=1	Yes	Yes	no	18	11	54	-	-	-	voltage-gated anion channel activity
	37	BCKDK	O14874	[3-methyl-2-oxobutanoate dehydrogenase [lipoamide]] kinase, mitochondrial OS=Homo sapiens GN=BCKDK PE=1 SV=2	Yes	Yes	no	-	-	-	12	10	22	Branched-chain amino acid catabolism
	38	PDK1	Q15118	[Pyruvate dehydrogenase (acetyl-transferring)] kinase isozyme 1, mitochondrial OS=Homo sapiens GN=PDK1 PE=1 SV=1	Yes	Yes	Yes	-	-	-	11	9	32	Carbohydrate metabolism, Glucose metabolism
	39	PDK2	Q15119	[Pyruvate dehydrogenase (acetyl-transferring)] kinase isozyme 2, mitochondrial OS=Homo sapiens GN=PDK2 PE=1 SV=2	Yes	no	no	-	-	-	12	8	27	Carbohydrate metabolism, Glucose metabolism
	40	SFN	P31947	14-3-3 protein sigma OS=Homo sapiens GN=SFN PE=1 SV=1	Yes	no	no	-	-	-	9	3	28	intrinsic apoptotic signaling pathway in response to DNA damage
	41	CNP	P09543	2',3'-cyclic-nucleotide 3'-phosphodiesterase OS=Homo sapiens GN=CNP PE=1 SV=2	Yes	no	no	-	-	-	9	9	24	aging; regulation of mitochondrial membrane permeability
	42	DECR1	A0A024R9D7	2,4-dienoyl CoA reductase 1, mitochondrial, isoform CRA_b OS=Homo sapiens GN=DECR1 PE=4 SV=1	Yes	no	no	-	-	-	42	31	38	positive regulation of cold-induced thermogenesis
	43	MRPS11	P82912	28S ribosomal protein S11, mitochondrial OS=Homo sapiens GN=MRPS11 PE=1 SV=2	Yes	no	no	-	-	-	6	5	29	DNA damage response, detection of DNA damage; mitochondrial translation
	44	MRPS22	P82650	28S ribosomal protein S22, mitochondrial OS=Homo sapiens GN=MRPS22 PE=1 SV=1	Yes	Yes	no	-	-	-	70	41	60	Mitochondrial translation initiation; Mitochondrial translation elongation; Mitochondrial translation termination
	45	MRPS26	Q9BYN8	28S ribosomal protein S26, mitochondrial OS=Homo sapiens GN=MRPS26 PE=1 SV=1	Yes	no	no	-	-	-	33	24	54	Mitochondrial translation initiation; Mitochondrial translation elongation; Mitochondrial translation termination
	46	DAP3	P51398	28S ribosomal protein S29, mitochondrial OS=Homo sapiens GN=DAP3 PE=1 SV=1	Yes	no	no	-	-	-	51	38	46	apoptotic signaling pathway
	47	MRPS31	Q92665	28S ribosomal protein S31, mitochondrial OS=Homo sapiens GN=MRPS31 PE=1 SV=3	Yes	no	no	-	-	-	30	23	33	Mitochondrial translation initiation; Mitochondrial translation elongation; Mitochondrial translation termination
	48	MRPS34	C9JJ19	28S ribosomal protein S34, mitochondrial OS=Homo sapiens GN=MRPS34 PE=1 SV=2	Yes	no	no	-	-	-	48	37	50	mitochondrial translation
	49	MRPS35	P82673	28S ribosomal protein S35, mitochondrial OS=Homo sapiens GN=MRPS35 PE=1 SV=1	Yes	no	no	-	-	-	41	21	54	DNA damage response, detection of DNA damage; mitochondrial translation
	50	MRPS7	J3QLS3	28S ribosomal protein S7, mitochondrial OS=Homo sapiens GN=MRPS7 PE=1 SV=1	Yes	no	no	-	-	-	44	28	48	Ribonucleoprotein
	51	MRPS9	P82933	28S ribosomal protein S9, mitochondrial OS=Homo sapiens GN=MRPS9 PE=1 SV=2	Yes	no	no	-	-	-	47	34	44	Mitochondrial translation initiation; Mitochondrial translation elongation; Mitochondrial translation termination
	52	MRPL11	Q9Y3B7	39S ribosomal protein L11, mitochondrial OS=Homo sapiens GN=MRPL11 PE=1 SV=1	Yes	no	no	-	-	-	25	23	62	large ribosomal subunit rRNA binding; mitochondrial translational
	53	MRPL16	Q9NX20	39S ribosomal protein L16, mitochondrial OS=Homo sapiens GN=MRPL16 PE=1 SV=1	Yes	no	Yes	-	-	-	13	11	33	Mitochondrial translation initiation; Mitochondrial translation elongation; Mitochondrial translation termination
	54	MRPL20	Q9BYC9	39S ribosomal protein L20, mitochondrial OS=Homo sapiens GN=MRPL20 PE=1 SV=1	Yes	Yes	Yes	-	-	-	4	4	13	Mitochondrial translation initiation; Mitochondrial translation elongation; Mitochondrial translation termination
	55	MRPL22	J3KQY1	39S ribosomal protein L22, mitochondrial OS=Homo sapiens GN=MRPL22 PE=1 SV=1	Yes	no	no	-	-	-	11	11	33	structural constituent of ribosome
	56	MRPL23	A8MYK1	39S ribosomal protein L23, mitochondrial OS=Homo sapiens GN=MRPL23 PE=1 SV=1	Yes	no	no	-	-	-	5	5	27	structural constituent of ribosome
	57	MRPL24	Q96A35	39S ribosomal protein L24, mitochondrial OS=Homo sapiens GN=MRPL24 PE=1 SV=1	Yes	Yes	Yes	-	-	-	31	24	55	Mitochondrial translation initiation; Mitochondrial translation elongation; Mitochondrial translation termination
	58	MRPL28	Q13084	39S ribosomal protein L28, mitochondrial OS=Homo sapiens GN=MRPL28 PE=1 SV=4	Yes	Yes	Yes	-	-	-	37	22	52	Mitochondrial translation initiation; Mitochondrial translation elongation; Mitochondrial translation termination
	59	MRPL37	Q9BZE1	39S ribosomal protein L37, mitochondrial OS=Homo sapiens GN=MRPL37 PE=1 SV=2	Yes	no	Yes	-	-	-	39	32	37	Mitochondrial translation initiation; Mitochondrial translation elongation; Mitochondrial translation termination
	60	MRPL38	Q96DV4	39S ribosomal protein L38, mitochondrial OS=Homo sapiens GN=MRPL38 PE=1 SV=2	Yes	no	Yes	-	-	-	31	23	41	Mitochondrial translation initiation; Mitochondrial translation elongation; Mitochondrial translation termination
	61	MRPL46	Q9H2W6	39S ribosomal protein L46, mitochondrial OS=Homo sapiens GN=MRPL46 PE=1 SV=1	Yes	no	Yes	-	-	-	15	10	31	Mitochondrial translation initiation; Mitochondrial translation elongation; Mitochondrial translation termination
	62	MRPL47	Q9HD33	39S ribosomal protein L47, mitochondrial OS=Homo sapiens GN=MRPL47 PE=1 SV=2	Yes	no	no	-	-	-	15	14	23	mitochondrial translation; structural constituent of ribosome
	63	MRPL9	Q9BYD2	39S ribosomal protein L9, mitochondrial OS=Homo sapiens GN=MRPL9 PE=1 SV=2	Yes	no	Yes	-	-	-	30	23	43	Mitochondrial translation initiation; Mitochondrial translation elongation; Mitochondrial translation termination
	64	RPS3	P23396	40S ribosomal protein S3 OS=Homo sapiens GN=RPS3 PE=1 SV=2	Yes	no	no	-	-	-	18	16	73	apoptotic process; damaged DNA binding
	65	ABAT	H3BRN4	4-aminobutyrate aminotransferase, mitochondrial OS=Homo sapiens GN=ABAT PE=1 SV=1	Yes	no	no	-	-	-	30	21	49	gamma-aminobutyric acid metabolic process
	66	NSUN4	Q96CB9	5-methylcytosine rRNA methyltransferase NSUN4 OS=Homo sapiens GN=NSUN4 PE=1 SV=2	Yes	no	no	-	-	-	7	6	14	Ribosome biogenesis, rRNA processing
	67	DLAT	A0A024R3D8	Acetyltransferase component of pyruvate dehydrogenase complex OS=Homo sapiens GN=DLAT PE=3 SV=1	Yes	no	no	-	-	-	11	9	11	pyruvate metabolic process; glycolysis / gluconeogenesis, Citrate cycle (TCA cycle)
	68	ACAD9	Q9H845	Acyl-CoA dehydrogenase family member 9, mitochondrial OS=Homo sapiens GN=ACAD9 PE=1 SV=1	Yes	no	Yes	-	-	-	49	37	40	mitochondrial respiratory chain complex I assembly; long-chain fatty acid metabolic process
	69	ACSF3	Q4G176	Acyl-CoA synthetase family member 3, mitochondrial OS=Homo sapiens GN=ACSF3 PE=1 SV=3	Yes	no	Yes	-	-	-	20	16	27	Fatty acid metabolism, Lipid metabolism
	70	ACSS3	Q9H6R3	Acyl-CoA synthetase short-chain family member 3, mitochondrial OS=Homo sapiens GN=ACSS3 PE=1 SV=1	Yes	Yes	no	-	-	-	4	3	6	Synthesis of Ketone Bodies
	71	ACADM	Q5T4U5	Acyl-Coenzyme A dehydrogenase, C-4 to C-12 straight chain, isoform CRA_a OS=Homo sapiens GN=ACADM PE=1 SV=1	Yes	no	no	-	-	-	14	11	24	mitochondrial fatty acid beta-oxidation
	72	AGK	Q53H12	Acylglycerol kinase, mitochondrial OS=Homo sapiens GN=AGK PE=1 SV=2	Yes	Yes	no	-	-	-	8	8	17	Glycerophospholipid biosynthesis
	73	AK4	P27144	Adenylate kinase 4, mitochondrial OS=Homo sapiens GN=AK4 PE=1 SV=1	Yes	no	Yes	-	-	-	10	7	47	Metabolic pathways; Purine metabolism; Thiamine metabolism
	74	N/A	Q59EI9	ADP,ATP carrier protein, liver isoform T2 variant (Fragment) OS=Homo sapiens PE=2 SV=1	Yes	no	no	-	-	-	208	24	53	ATP transmembrane transporter activity
	75	ALDH7A1	A0A1B0GW77	Alpha-aminoadipic semialdehyde dehydrogenase OS=Homo sapiens GN=ALDH7A1 PE=1 SV=1	Yes	no	no	-	-	-	39	32	31	oxidoreductase activity, acting on the aldehyde or oxo group of donors, NAD or NADP as acceptor
	76	NDUFAF5	Q5TEU4	Arginine-hydroxylase NDUFAF5, mitochondrial OS=Homo sapiens GN=NDUFAF5 PE=1 SV=1	Yes	no	Yes	-	-	-	7	7	17	mitochondrial respiratory chain complex I assembly
	77	N/A	A0A024R8Z9	Aspartyl-tRNA synthetase 2 (Mitochondrial), isoform CRA_b OS=Homo sapiens GN=DARS2 PE=3 SV=1	Yes	no	no	-	-	-	30	24	32	mitochondrial asparaginyl-tRNA aminoacylation
	78	ATPAF2	Q8N5M1	ATP synthase mitochondrial F1 complex assembly factor 2 OS=Homo sapiens GN=ATPAF2 PE=1 SV=1	Yes	no	Yes	-	-	-	19	12	52	proton-transporting ATP synthase complex assembly
	79	HEL-S-123m	V9HW26	ATP synthase subunit alpha OS=Homo sapiens GN=HEL-S-123m PE=2 SV=1	Yes	no	no	-	-	-	356	198	64	ATP synthesis coupled proton transport; lipid metabolic process
	80	ATP5F1A	K7ERX7	ATP synthase subunit alpha, mitochondrial (Fragment) OS=Homo sapiens GN=ATP5A1 PE=1 SV=1	Yes	no	no	-	-	-	51	1	74	ATP metabolic process; proton transmembrane transport
	81	ATP5ME	P56385	ATP synthase subunit e, mitochondrial OS=Homo sapiens GN=ATP5I PE=1 SV=2	Yes	no	no	-	-	-	6	5	74	ATP biosynthetic process; mitochondrial ATP synthesis coupled proton transport
	82	ATAD3B	Q5T9A4	ATPase family AAA domain-containing protein 3B OS=Homo sapiens GN=ATAD3B PE=1 SV=1	Yes	no	no	-	-	-	6	6	4	mitochondrion organization
	83	ATP5IF1	Q9UII2	ATPase inhibitor, mitochondrial OS=Homo sapiens GN=ATPIF1 PE=1 SV=1	Yes	no	no	-	-	-	11	7	42	mitochondrial depolarization; positive regulation of mitochondrial outer membrane permeabilization involved in apoptotic signaling pathway; regulation of ATP metabolic process
	84	YME1L1	Q96TA2	ATP-dependent zinc metalloprotease YME1L1 OS=Homo sapiens GN=YME1L1 PE=1 SV=2	Yes	no	no	-	-	-	38	35	29	ATP binding; mitochondrial calcium ion transmembrane transpor
	85	BCAT2	O15382	Branched-chain-amino-acid aminotransferase, mitochondrial OS=Homo sapiens GN=BCAT2 PE=1 SV=2	Yes	Yes	Yes	-	-	-	20	11	39	Amino-acid biosynthesis, Branched-chain amino acid biosynthesis
	86	BRI3BP	Q8WY22	BRI3-binding protein OS=Homo sapiens GN=BRI3BP PE=1 SV=1	Yes	no	no	-	-	-	4	4	20	Involved in tumorigenesis and may function by stabilizing p53/TP53
	87	MCU	Q8NE86	Calcium uniporter protein, mitochondrial OS=Homo sapiens GN=MCU PE=1 SV=1	Yes	no	Yes	-	-	-	14	12	20	Calcium transport, Ion transport, Transport
	88	N/A	B3KM74	cDNA FLJ10425 fis, clone NT2RP1000326, highly similar to Metaxin-2 OS=Homo sapiens PE=2 SV=1	Yes	no	no	-	-	-	11	8	29	-
	89	N/A	B3KMV8	cDNA FLJ12766 fis, clone NT2RP2001520, highly similar to Calcium-binding mitochondrial carrier protein Aralar1 OS=Homo sapiens PE=2 SV=1	Yes	no	no	-	-	-	15	7	17	ATP transmembrane transporter activity
	90	N/A	Q96DP0	cDNA FLJ31479 fis, clone NT2NE2001634, moderately similar to NADH-UBIQUINONE OXIDOREDUCTASE 9 KD SUBUNIT (EC 1.6.5.3) OS=Homo sapiens PE=2 SV=1	Yes	no	no	-	-	-	15	11	36	Accessory subunit of the mitochondrial membrane respiratory chain NADH dehydrogenase (Complex I)
	91	N/A	B3KTT6	cDNA FLJ38699 fis, clone KIDNE2002168, highly similar to Short chain 3-hydroxyacyl-CoA dehydrogenase, mitochondrial (EC 1.1.1.35) OS=Homo sapiens PE=2 SV=1	Yes	no	no	-	-	-	11	10	38	fatty acid metabolic process
	92	N/A	B4E290	cDNA FLJ50039, highly similar to Homo sapiens solute carrier family 25, member 24, transcript variant 1, mRNA OS=Homo sapiens PE=2 SV=1	Yes	no	no	-	-	-	76	71	42	ATP transmembrane transporter activity; calcium ion binding
	93	N/A	B4DKM0	cDNA FLJ51883, highly similar to Mitochondrial 39S ribosomal protein L3 OS=Homo sapiens PE=2 SV=1	Yes	no	no	-	-	-	17	13	37	structural constituent of ribosome
	94	N/A	B4DU42	cDNA FLJ56153, highly similar to Homo sapiens transforming growth factor beta regulator 4 (TBRG4), transcript variant 1, mRNA OS=Homo sapiens PE=2 SV=1	Yes	no	no	-	-	-	22	20	28	regulation of mitochondrial mRNA stability
	95	N/A	B4DI54	cDNA FLJ56386, highly similar to Heat shock 70 kDa protein 1L OS=Homo sapiens PE=2 SV=1	Yes	no	no	-	-	-	28	1	23	Stress response; ATP binding
	96	N/A	B4DEA8	cDNA FLJ56425, highly similar to Very-long-chain specific acyl-CoAdehydrogenase, mitochondrial (EC 1.3.99.-) OS=Homo sapiens PE=2 SV=1	Yes	no	no	-	-	-	55	47	28	acyl-CoA dehydrogenase activity
	97	N/A	B4DVS4	cDNA FLJ57619, highly similar to Delta 3,5-delta 2,4-dienoyl-CoA isomerase, mitochondrial (EC 5.3.3.-) OS=Homo sapiens PE=2 SV=1	Yes	no	no	-	-	-	45	2	44	isomerase activity
	98	MRPL45	B4DEF8	cDNA FLJ61100, highly similar to 39S ribosomal protein L45, mitochondrial OS=Homo sapiens PE=2 SV=1	Yes	no	no	-	-	-	30	21	48	Ribonucleoprotein, Ribosomal protein
	99	N/A	A8K4V2	cDNA FLJ75930, highly similar to Homo sapiens NADH dehydrogenase (ubiquinone) 1 alpha subcomplex, 9, 39kDa (NDUFA9), mRNA OS=Homo sapiens PE=2 SV=1	Yes	no	no	-	-	-	56	39	38	NADH dehydrogenase [ubiquinone] 1 alpha subcomplex subunit 9, mitochondrial
	100	N/A	A8K7J6	cDNA FLJ76418, highly similar to Homo sapiens mitochondrial ribosomal protein L52 (MRPL52), transcript variant 1, mRNA OS=Homo sapiens PE=1 SV=1	Yes	no	no	-	-	-	9	5	54	structural constituent of ribosome; mitochondrial translation
	101	N/A	A8K9B2	cDNA FLJ76725, highly similar to Homo sapiens L-2-hydroxyglutarate dehydrogenase (L2HGDH), mRNA OS=Homo sapiens PE=2 SV=1	Yes	no	no	-	-	-	11	10	24	oxidoreductase activity; L-2-hydroxyglutarate dehydrogenase, mitochondrial
	102	N/A	A8K750	cDNA FLJ78041, highly similar to Homo sapiens NADH dehydrogenase (ubiquinone) flavoprotein 2, 24kDa (NDUFV2), mRNA OS=Homo sapiens PE=2 SV=1	Yes	no	no	-	-	-	40	12	52	metal ion binding; oxidoreductase activity
	103	N/A	A8K4W2	cDNA FLJ78635, highly similar to Homo sapiens ATP synthase, H+ transporting, mitochondrial F0 complex, subunit b, isoform 1 (ATP5F1), transcript variant 1, mRNA OS=Homo sapiens PE=2 SV=1	Yes	no	no	-	-	-	68	26	45	ATP synthesis coupled proton transport; proton transmembrane transporter activity
	104	N/A	B2R921	cDNA, FLJ94171, highly similar to Homo sapiens solute carrier family 25 (mitochondrial carrier; ornithine transporter) member 15 (SLC25A15), nuclear gene encoding mitochondrial protein, mRNA OS=Homo sapiens PE=2 SV=1	Yes	no	no	-	-	-	7	7	23	Mitochondrial ornithine transporter 1
	105	N/A	B2RB23	cDNA, FLJ95265, highly similar to Homo sapiens acetyl-Coenzyme A acyltransferase 2 (mitochondrial 3-oxoacyl-Coenzyme A thiolase) (ACAA2), nuclear gene encoding mitochondrial protein, mRNA OS=Homo sapiens PE=2 SV=1	Yes	no	no	-	-	-	24	19	52	Lipid metabolism
	106	CS	O75390	Citrate synthase, mitochondrial OS=Homo sapiens GN=CS PE=1 SV=2	Yes	Yes	Yes	-	-	-	75	55	52	Amino Acid metabolism; TCA Cycle
	107	CLPX	A0A024R5X7	ClpX caseinolytic peptidase X homolog (E. coli), isoform CRA_a OS=Homo sapiens GN=CLPX PE=4 SV=1	Yes	no	no	-	-	-	11	9	18	protein folding
	108	TIMMDC1	Q9NPL8	Complex I assembly factor TIMMDC1, mitochondrial OS=Homo sapiens GN=TIMMDC1 PE=1 SV=2	Yes	Yes	Yes	-	-	-	14	10	44	mitochondrial respiratory chain complex I assembly
	109	NDUFAF1	Q9Y375	Complex I intermediate-associated protein 30, mitochondrial OS=Homo sapiens GN=NDUFAF1 PE=1 SV=2	Yes	Yes	Yes	-	-	-	13	9	29	Complex I biogenesis
	110	CKMT1A	P12532	Creatine kinase U-type, mitochondrial OS=Homo sapiens GN=CKMT1A PE=1 SV=1	Yes	no	Yes	-	-	-	22	18	43	Creatine metabolism
	111	UQCRC1	P31930	Cytochrome b-c1 complex subunit 1, mitochondrial OS=Homo sapiens GN=UQCRC1 PE=1 SV=3	Yes	Yes	Yes	-	-	-	87	56	54	Electron Transport Chain
	112	UQCRC2	P22695	Cytochrome b-c1 complex subunit 2, mitochondrial OS=Homo sapiens GN=UQCRC2 PE=1 SV=3	Yes	no	Yes	-	-	-	149	73	59	Electron Transport Chain
	113	N/A	B2R4A2	Cytochrome b-c1 complex subunit 7 OS=Homo sapiens PE=2 SV=1	Yes	no	no	-	-	-	4	3	34	mitochondrial electron transport, ubiquinol to cytochrome c
	114	UQCRFS1	P47985	Cytochrome b-c1 complex subunit Rieske, mitochondrial OS=Homo sapiens GN=UQCRFS1 PE=1 SV=2	Yes	no	no	-	-	-	27	19	51	Electron Transport Chain
	115	COX15	Q7KZN9	Cytochrome c oxidase assembly protein COX15 homolog OS=Homo sapiens GN=COX15 PE=1 SV=1	Yes	no	no	-	-	-	9	7	18	respiratory chain complex IV assembly; heme biosynthetic process;
	116	COII	Q4GCC3	Cytochrome c oxidase subunit 2 OS=Homo sapiens GN=COII PE=3 SV=1	Yes	no	no	-	-	-	10	5	26	Component of the cytochrome c oxidase
	117	COX4I1	P13073	Cytochrome c oxidase subunit 4 isoform 1, mitochondrial OS=Homo sapiens GN=COX4I1 PE=1 SV=1	Yes	no	no	-	-	-	19	12	53	Electron Transport Chain
	118	CYC1	P08574	Cytochrome c1, heme protein, mitochondrial OS=Homo sapiens GN=CYC1 PE=1 SV=3	Yes	no	no	-	-	-	91	37	35	Respiratory electron transport; Mitochondrial protein import; Metabolism of proteins
	119	BDH1	Q02338	D-beta-hydroxybutyrate dehydrogenase, mitochondrial OS=Homo sapiens GN=BDH1 PE=1 SV=3	Yes	Yes	Yes	-	-	-	11	11	28	Synthesis and Degradation of Ketone Bodies
	120	PDSS2	Q86YH6	Decaprenyl-diphosphate synthase subunit 2 OS=Homo sapiens GN=PDSS2 PE=1 SV=2	Yes	no	no	-	-	-	16	13	40	ubiquinone biosynthesis
	121	ECH1	Q13011	Delta(3,5)-Delta(2,4)-dienoyl-CoA isomerase, mitochondrial OS=Homo sapiens GN=ECH1 PE=1 SV=2	Yes	no	no	-	-	-	168	56	58	fatty acid beta-oxidation
	122	DGUOK	E5KSL5	Deoxyguanosine kinase isoform 1 OS=Homo sapiens GN=DGUOK PE=2 SV=1	Yes	no	no	-	-	-	34	18	36	dGTP metabolic process
	123	DLD	A0A024R713	Dihydrolipoyl dehydrogenase OS=Homo sapiens GN=DLD PE=3 SV=1	Yes	no	no	-	-	-	47	37	27	lipoate metabolic process; aging; mitochondrial electron transport, NADH to ubiquinone
	124	DNAJA3	Q53G26	DnaJ (Hsp40) homolog, subfamily A, member 3 variant (Fragment) OS=Homo sapiens GN=DNAJA3 PE=1 SV=1	Yes	no	no	-	-	-	9	8	13	negative regulation of programmed cell death; mitochondrial DNA replication; cell aging;response to heat
	125	DNAJC11	Q9NVH1	DnaJ homolog subfamily C member 11 OS=Homo sapiens GN=DNAJC11 PE=1 SV=2	Yes	no	no	-	-	-	13	12	20	inner mitochondrial membrane organization
	126	DPM1	H0Y368	Dolichol-phosphate mannosyltransferase subunit 1 (Fragment) OS=Homo sapiens GN=DPM1 PE=1 SV=1	Yes	no	no	-	-	-	9	8	21	protein glycosylation
	127	ETFA	P13804	Electron transfer flavoprotein subunit alpha, mitochondrial OS=Homo sapiens GN=ETFA PE=1 SV=1	Yes	no	no	-	-	-	39	23	59	fatty acid beta-oxidation using acyl-CoA dehydrogenase; respiratory electron transport chain
	128	ETFB	P38117	Electron transfer flavoprotein subunit beta OS=Homo sapiens GN=ETFB PE=1 SV=3	Yes	no	no	-	-	-	59	31	62	Respiratory electron transport; Protein methylation
	129	TSFM	E5KS95	Elongation factor Ts, mitochondrial OS=Homo sapiens GN=TSFM PE=3 SV=1	Yes	no	no	-	-	-	11	9	24	Protein biosynthesis
	130	TUFM	P49411	Elongation factor Tu, mitochondrial OS=Homo sapiens GN=TUFM PE=1 SV=2	Yes	Yes	no	-	-	-	152	104	59	Mitochondrial translation elongation
	131	ECHS1	P30084	Enoyl-CoA hydratase, mitochondrial OS=Homo sapiens GN=ECHS1 PE=1 SV=4	Yes	Yes	Yes	-	-	-	169	57	53	Fatty Acid Beta Oxidation; Fatty Acid Biosynthesis; Tryptophan metabolism
	132	HEL-S-89n	V9HWB4	Epididymis secretory sperm binding protein Li 89n OS=Homo sapiens GN=HEL-S-89n PE=2 SV=1	Yes	no	no	-	-	-	319	165	61	cellular response to stress
	133	N/A	E9KL44	Epididymis tissue sperm binding protein Li 14m OS=Homo sapiens PE=2 SV=1	Yes	no	no	-	-	-	259	151	64	fatty acid beta-oxidation
	134	HSD17B8	Q92506	Estradiol 17-beta-dehydrogenase 8 OS=Homo sapiens GN=HSD17B8 PE=1 SV=2	Yes	no	no	-	-	-	15	12	34	estrogen biosynthesis; fatty acid biosynthesis
	135	ECSIT	Q9BQ95	Evolutionarily conserved signaling intermediate in Toll pathway, mitochondrial OS=Homo sapiens GN=ECSIT PE=1 SV=1	Yes	Yes	no	-	-	-	8	8	20	MAPK signaling pathway; IL-1 signaling pathway
	136	FH	P07954	Fumarate hydratase, mitochondrial OS=Homo sapiens GN=FH PE=1 SV=3	Yes	no	no	-	-	-	69	44	45	TCA cycle
	137	GLUD2	P49448	Glutamate dehydrogenase 2, mitochondrial OS=Homo sapiens GN=GLUD2 PE=1 SV=2	Yes	no	Yes	-	-	-	37	1	36	Transcriptional activation of mitochondrial biogenesis; Glutamate and glutamine metabolism
	138	QRSL1	B2RBJ8	Glutamyl-tRNA(Gln) amidotransferase subunit A, mitochondrial OS=Homo sapiens GN=QRSL1 PE=2 SV=1	Yes	no	no	-	-	-	5	5	9	mitochondrial translation
	139	GATB	O75879	Glutamyl-tRNA(Gln) amidotransferase subunit B, mitochondrial OS=Homo sapiens GN=GATB PE=1 SV=1	Yes	Yes	Yes	-	-	-	10	10	19	Protein biosynthesis
	140	GCDH	A0A024R7F9	Glutaryl-Coenzyme A dehydrogenase, isoform CRA_a OS=Homo sapiens GN=GCDH PE=3 SV=1	Yes	no	no	-	-	-	10	8	19	fatty acid oxidation
	141	GADD45GIP1	Q8TAE8	Growth arrest and DNA damage-inducible proteins-interacting protein 1 OS=Homo sapiens GN=GADD45GIP1 PE=1 SV=1	Yes	no	no	-	-	-	12	10	30	mitotic cell cycle arrest
	142	GRPEL1	Q9HAV7	GrpE protein homolog 1, mitochondrial OS=Homo sapiens GN=GRPEL1 PE=1 SV=2	Yes	Yes	no	-	-	-	20	15	40	protein import into mitochondrial matrix
	143	AK3	Q7Z4Y4	GTP:AMP phosphotransferase AK3, mitochondrial OS=Homo sapiens GN=AK3 PE=2 SV=1	Yes	no	no	-	-	-	12	7	36	ADP biosynthetic process; AMP metabolic process; GTP metabolic process; ITP metabolic process
	144	HDHD3	A0A024R837	Haloacid dehalogenase-like hydrolase domain containing 3, isoform CRA_a OS=Homo sapiens GN=HDHD3 PE=4 SV=1	Yes	no	no	-	-	-	9	7	30	hydrolase activity
	145	HDHD5	Q9BXW7	Haloacid dehalogenase-like hydrolase domain-containing 5 OS=Homo sapiens GN=HDHD5 PE=1 SV=1	Yes	no	no	-	-	-	29	19	38	glycerophospholipid biosynthetic process
	146	HINT2	Q9BX68	Histidine triad nucleotide-binding protein 2, mitochondrial OS=Homo sapiens GN=HINT2 PE=1 SV=1	Yes	no	Yes	-	-	-	7	5	41	Apoptosis, Lipid biosynthesis, Lipid metabolism, Steroid biosynthesis
	147	HAGH	Q16775	Hydroxyacylglutathione hydrolase, mitochondrial OS=Homo sapiens GN=HAGH PE=1 SV=2	Yes	no	no	-	-	-	4	3	11	methylglyoxal degradation
	148	HSDL1	I6L975	Hydroxysteroid dehydrogenase like 1 OS=Homo sapiens GN=HSDL1 PE=2 SV=1	Yes	no	no	-	-	-	9	8	22	short-chain dehydrogenases/reductases (SDR) family
	149	HSCB	Q8IWL3	Iron-sulfur cluster co-chaperone protein HscB, mitochondrial OS=Homo sapiens GN=HSCB PE=1 SV=3	Yes	Yes	no	-	-	-	5	5	20	Mitochondrial protein import; Mitochondrial iron-sulfur cluster biogenesis
	150	NUBPL	Q8TB37	Iron-sulfur protein NUBPL OS=Homo sapiens GN=NUBPL PE=1 SV=3	Yes	no	no	-	-	-	4	4	16	mitochondrial respiratory chain complex I assembly
	151	IDH3A	P50213	Isocitrate dehydrogenase [NAD] subunit alpha, mitochondrial OS=Homo sapiens GN=IDH3A PE=1 SV=1	Yes	no	no	-	-	-	34	22	38	carbohydrate metabolic process; TCA cycle
	152	IDH3G	P51553	Isocitrate dehydrogenase [NAD] subunit gamma, mitochondrial OS=Homo sapiens GN=IDH3G PE=1 SV=1	Yes	no	no	-	-	-	12	10	32	carbohydrate metabolic process; TCA cycle
	153	IDH3B	A0A087WZN1	Isocitrate dehydrogenase [NAD] subunit, mitochondrial OS=Homo sapiens GN=IDH3B PE=1 SV=1	Yes	no	no	-	-	-	50	32	37	TCA cycle;
	154	IDH2	P48735	Isocitrate dehydrogenase [NADP], mitochondrial OS=Homo sapiens GN=IDH2 PE=1 SV=2	Yes	no	no	-	-	-	203	125	70	Glyoxylate bypass, Tricarboxylic acid cycle
	155	PDK3	Q15120-2	Isoform 2 of [Pyruvate dehydrogenase (acetyl-transferring)] kinase isozyme 3, mitochondrial OS=Homo sapiens GN=PDK3	Yes	no	no	-	-	-	38	34	36	cellular response to fatty acid; cellular response to glucose stimulus; hypoxia-inducible factor-1alpha signaling pathway; regulation of reactive oxygen species metabolic process
	156	MRPL10	Q7Z7H8-2	Isoform 2 of 39S ribosomal protein L10, mitochondrial OS=Homo sapiens GN=MRPL10	Yes	no	no	-	-	-	5	4	7	Mitochondrial translation initiation; Mitochondrial translation elongation; Mitochondrial translation termination
	157	MRPL30	Q8TCC3-2	Isoform 2 of 39S ribosomal protein L30, mitochondrial OS=Homo sapiens GN=MRPL30	Yes	Yes	Yes	-	-	-	7	5	27	Mitochondrial translation initiation; Mitochondrial translation elongation; Mitochondrial translation termination
	158	MRPL39	Q9NYK5-2	Isoform 2 of 39S ribosomal protein L39, mitochondrial OS=Homo sapiens GN=MRPL39	Yes	no	no	-	-	-	43	35	37	Mitochondrial translation initiation; Mitochondrial translation elongation; Mitochondrial translation termination
	159	ACSF2	Q96CM8-2	Isoform 2 of Acyl-CoA synthetase family member 2, mitochondrial OS=Homo sapiens GN=ACSF2	Yes	no	no	-	-	-	7	6	14	fatty acid metabolic process; acyl-CoA metabolic process; medium-chain fatty acid-CoA ligase activity
	160	ATAD3A	Q9NVI7-2	Isoform 2 of ATPase family AAA domain-containing protein 3A OS=Homo sapiens GN=ATAD3A	Yes	no	no	-	-	-	84	73	52	mitochondrion organization; negative regulation of apoptotic process; regulation of cell growth
	161	BCAP31	P51572-2	Isoform 2 of B-cell receptor-associated protein 31 OS=Homo sapiens GN=BCAP31	Yes	no	no	-	-	-	33	18	45	Apoptotic cleavage of cellular proteins; Apoptotic execution phase
	162	CLU	P10909-2	Isoform 2 of Clusterin OS=Homo sapiens GN=CLU	Yes	no	no	-	-	-	13	13	14	Apoptosis, Complement pathway
	163	ETFB	P38117-2	Isoform 2 of Electron transfer flavoprotein subunit beta OS=Homo sapiens GN=ETFB	Yes	no	no	-	-	-	5	5	15	fatty acid beta-oxidation using acyl-CoA dehydrogenase; respiratory electron transport chain
	164	FECH	P22830-2	Isoform 2 of Ferrochelatase, mitochondrial OS=Homo sapiens GN=FECH	Yes	no	Yes	-	-	-	6	5	12	heme biosynthetic process; porphyrin biosynthesis; response to dexamethasone stimulus, arsenic-containing substance, ethanol, insecticide, lead ion, methylmercury, platinum ion
	165	HAX1	O00165-2	Isoform 2 of HCLS1-associated protein X-1 OS=Homo sapiens GN=HAX1	Yes	no	no	-	-	-	22	17	57	regulation of apoptotic process; regulation of autophagy of mitochondrion;
	166	PPA2	Q9H2U2-2	Isoform 2 of Inorganic pyrophosphatase 2, mitochondrial OS=Homo sapiens GN=PPA2	Yes	no	no	-	-	-	92	40	54	regulation of mitochondrial membrane potential; phosphate-containing compound metabolic process;
	167	ISCA1	Q9BUE6-2	Isoform 2 of Iron-sulfur cluster assembly 1 homolog, mitochondrial OS=Homo sapiens GN=ISCA1	Yes	no	no	-	-	-	5	4	28	protein maturation by iron-sulfur cluster transfer
	168	SLC25A10	Q9UBX3-2	Isoform 2 of Mitochondrial dicarboxylate carrier OS=Homo sapiens GN=SLC25A10	Yes	no	no	-	-	-	34	27	43	Mitochondrial transmembrane transport
	169	NDUFV3	P56181-2	Isoform 2 of NADH dehydrogenase [ubiquinone] flavoprotein 3, mitochondrial OS=Homo sapiens GN=NDUFV3	Yes	no	no	-	-	-	11	9	13	mitochondrial respiratory chain complex I assembly; Respiratory electron transport
	170	NDUFS1	P28331-2	Isoform 2 of NADH-ubiquinone oxidoreductase 75 kDa subunit, mitochondrial OS=Homo sapiens GN=NDUFS1	Yes	no	Yes	-	-	-	151	89	53	mitochondrial respiratory chain complex I assembly; apoptotic mitochondrial changes
	171	PITRM1	Q5JRX3-2	Isoform 2 of Presequence protease, mitochondrial OS=Homo sapiens GN=PITRM1	Yes	no	no	-	-	-	6	6	7	protein targeting to mitochondrio
	172	EARS2	Q5JPH6-2	Isoform 2 of Probable glutamate--tRNA ligase, mitochondrial OS=Homo sapiens GN=EARS2	Yes	no	Yes	-	-	-	9	9	15	Mitochondrial tRNA aminoacylation
	173	DHX30	Q7L2E3-2	Isoform 2 of Putative ATP-dependent RNA helicase DHX30 OS=Homo sapiens GN=DHX30	Yes	no	no	-	-	-	25	25	18	Ribosome biogenesis (mitochondrial large ribosomal subunit assembly)
	174	VDAC3	Q9Y277-2	Isoform 2 of Voltage-dependent anion-selective channel protein 3 OS=Homo sapiens GN=VDAC3	Yes	Yes	no	-	-	-	8	5	28	voltage-gated anion channel activity
	175	GLS	O94925-3	Isoform 3 of Glutaminase kidney isoform, mitochondrial OS=Homo sapiens GN=GLS	Yes	no	Yes	-	-	-	9	8	16	cellular amino acid biosynthetic process
	176	PYCR1	P32322-3	Isoform 3 of Pyrroline-5-carboxylate reductase 1, mitochondrial OS=Homo sapiens GN=PYCR1	Yes	no	no	-	-	-	24	18	39	Amino Acid metabolism; Urea cycle and metabolism of amino groups
	177	ACOT9	Q9Y305-4	Isoform 4 of Acyl-coenzyme A thioesterase 9, mitochondrial OS=Homo sapiens GN=ACOT9	Yes	Yes	no	-	-	-	12	11	19	Mitochondrial Fatty Acid Beta-Oxidation
	178	MRS2	Q9HD23-4	Isoform 4 of Magnesium transporter MRS2 homolog, mitochondrial OS=Homo sapiens GN=MRS2	Yes	Yes	Yes	-	-	-	14	12	30	Miscellaneous transport and binding events
	179	PDHA1	P08559-4	Isoform 4 of Pyruvate dehydrogenase E1 component subunit alpha, somatic form, mitochondrial OS=Homo sapiens GN=PDHA1	Yes	no	no	-	-	-	14	14	15	Carbohydrate metabolism, Glucose metabolism, Tricarboxylic acid cycle
	180	TMLHE	Q9NVH6-8	Isoform 8 of Trimethyllysine dioxygenase, mitochondrial OS=Homo sapiens GN=TMLHE	Yes	Yes	Yes	-	-	-	33	24	31	carnitine biosynthesis
	181	PPP1CC	P36873-2	Isoform Gamma-2 of Serine/threonine-protein phosphatase PP1-gamma catalytic subunit OS=Homo sapiens GN=PPP1CC	Yes	no	no	-	-	-	8	1	14	carbohydrate metabolism; glycogen metabolic process; cell cycle;
	182	KARS1	Q15046-2	Isoform Mitochondrial of Lysine--tRNA ligase OS=Homo sapiens GN=KARS	Yes	no	Yes	-	-	-	23	20	27	Selenoamino acid metabolism; Cytosolic tRNA aminoacylation; Mitochondrial tRNA aminoacylation
	183	LETM1	O95202	LETM1 and EF-hand domain-containing protein 1, mitochondrial OS=Homo sapiens GN=LETM1 PE=1 SV=1	Yes	no	no	-	-	-	24	20	25	calcium:proton antiporter activity; calcium export from the mitochondrion;
	184	LONP1	E5KMI6	Lon protease homolog, mitochondrial OS=Homo sapiens GN=LONP1 PE=3 SV=1	Yes	no	no	-	-	-	12	11	10	cellular response to oxidative stress; oxidation-dependent protein catabolic process
	185	LYRM4	Q9HD34	LYR motif-containing protein 4 OS=Homo sapiens GN=LYRM4 PE=1 SV=1	Yes	Yes	no	-	-	-	7	6	52	Mitochondrial iron-sulfur cluster biogenesis
	186	MLYCD	O95822	Malonyl-CoA decarboxylase, mitochondrial OS=Homo sapiens GN=MLYCD PE=1 SV=3	Yes	no	Yes	-	-	-	21	18	37	Fatty acid biosynthesis, Fatty acid metabolism, Lipid biosynthesis, Lipid metabolism
	187	MTX3	Q5HYI7	Metaxin-3 OS=Homo sapiens GN=MTX3 PE=1 SV=2	Yes	no	no	-	-	-	8	7	12	inner mitochondrial membrane organization
	188	MCCC2	Q9HCC0	Methylcrotonoyl-CoA carboxylase beta chain, mitochondrial OS=Homo sapiens GN=MCCC2 PE=1 SV=1	Yes	no	no	-	-	-	111	77	42	L-leucine degradation; branched-chain amino acid catabolic process; coenzyme A metabolic process
	189	MCCC1	Q96RQ3	Methylcrotonoyl-CoA carboxylase subunit alpha, mitochondrial OS=Homo sapiens GN=MCCC1 PE=1 SV=3	Yes	no	Yes	-	-	-	19	15	27	Branched-chain amino acid catabolism
	190	AUH	Q13825	Methylglutaconyl-CoA hydratase, mitochondrial OS=Homo sapiens GN=AUH PE=1 SV=1	Yes	Yes	Yes	-	-	-	7	6	22	Branched-chain amino acid catabolism
	191	ALDH6A1	Q02252	Methylmalonate-semialdehyde dehydrogenase [acylating], mitochondrial OS=Homo sapiens GN=ALDH6A1 PE=1 SV=2	Yes	Yes	Yes	-	-	-	45	37	36	Branched-chain amino acid catabolism
	192	IMMT	Q16891	MICOS complex subunit MIC60 OS=Homo sapiens GN=IMMT PE=1 SV=1	Yes	no	no	-	-	-	83	61	46	cell organization and biogenesis;cellular homeostasis; Component of the MICOS complex
	193	APOOL	A0A087WYF7	MICOS complex subunit OS=Homo sapiens GN=APOOL PE=1 SV=1	Yes	no	no	-	-	-	11	8	25	Component of the MICOS complex, a large protein complex of the mitochondrial inner membrane that plays crucial roles in the maintenance of crista junctions, inner membrane architecture, and formation of contact sites to the outer membrane
	194	CHCHD3	C9JRZ6	MICOS complex subunit OS=Homo sapiens GN=CHCHD3 PE=1 SV=1	Yes	no	no	-	-	-	74	51	50	Component of the MICOS complex, a large protein complex of the mitochondrial inner membrane that plays crucial roles in the maintenance of crista junctions, inner membrane architecture, and formation of contact sites to the outer membrane
	195	CHCHD6	J3QTA6	MICOS complex subunit OS=Homo sapiens GN=CHCHD6 PE=1 SV=1	Yes	no	no	-	-	-	10	8	34	Component of the MICOS complex, a large protein complex of the mitochondrial inner membrane that plays crucial roles in the maintenance of crista junctions, inner membrane architecture, and formation of contact sites to the outer membrane.
	196	MGST1	P10620	Microsomal glutathione S-transferase 1 OS=Homo sapiens GN=MGST1 PE=1 SV=1	Yes	no	no	-	-	-	7	5	30	cell differentiation;cell organization and biogenesis;metabolic process;response to stimulus;transport; Glutathione conjugation
	197	MAVS	Q7Z434	Mitochondrial antiviral-signaling protein OS=Homo sapiens GN=MAVS PE=1 SV=2	Yes	no	no	-	-	-	4	4	7	Antiviral defense, Host-virus interaction, Immunity, Innate immunity
	198	SLC25A29	Q8N8R3	Mitochondrial basic amino acids transporter OS=Homo sapiens GN=SLC25A29 PE=1 SV=2	Yes	no	no	-	-	-	4	4	7	Amino acid transport across the plasma membrane; mitochondrial L-ornithine transmembrane transport
	199	MTCH2	E9PIE4	Mitochondrial carrier homolog 2 (Fragment) OS=Homo sapiens GN=MTCH2 PE=1 SV=8	Yes	no	no	-	-	-	11	1	34	Mitochondrial carrier
	200	N/A	E5KNL5	Mitochondrial endonuclease G OS=Homo sapiens PE=4 SV=1	Yes	no	no	-	-	-	7	7	25	apoptotic DNA fragmentation; aging; cellular response to calcium ion; cellular response to glucose stimulus; cellular response to hypoxia; response to antibiotic; response to estradiol; response to mechanical stimulus; response to tumor necrosis factor
	201	MGME1	Q9BQP7	Mitochondrial genome maintenance exonuclease 1 OS=Homo sapiens GN=MGME1 PE=1 SV=1	Yes	no	no	-	-	-	9	8	17	mitochondrial DNA repair; mitochondrial DNA replication; mitochondrial genome maintenance
	202	SLC25A22	Q9H936	Mitochondrial glutamate carrier 1 OS=Homo sapiens GN=SLC25A22 PE=1 SV=1	Yes	no	Yes	-	-	-	10	10	19	aspartate transmembrane transport; ion transport; L-glutamate transmembrane transport; malate-aspartate shuttle
	203	TIMM29	Q9BSF4	Mitochondrial import inner membrane translocase subunit Tim29 OS=Homo sapiens GN=TIMM29 PE=1 SV=2	Yes	no	Yes	-	-	-	8	6	30	protein insertion into mitochondrial inner membrane
	204	TIMM44	O43615	Mitochondrial import inner membrane translocase subunit TIM44 OS=Homo sapiens GN=TIMM44 PE=1 SV=2	Yes	Yes	Yes	-	-	-	25	20	31	Mitochondrial protein import
	205	TOMM40	O96008	Mitochondrial import receptor subunit TOM40 homolog OS=Homo sapiens GN=TOMM40 PE=1 SV=1	Yes	no	no	-	-	-	17	10	34	ion transport; macroautophagy
	206	TOMM70	O94826	Mitochondrial import receptor subunit TOM70 OS=Homo sapiens GN=TOMM70 PE=1 SV=1	Yes	no	no	-	-	-	10	10	16	protein targeting to mitochondrion
	207	OXA1L	J3KNA0	Mitochondrial inner membrane protein OXA1L OS=Homo sapiens GN=OXA1L PE=1 SV=1	Yes	no	no	-	-	-	8	5	13	Mitochondrial inner membrane protein
	208	RHOT2	Q8IXI1	Mitochondrial Rho GTPase 2 OS=Homo sapiens GN=RHOT2 PE=1 SV=2	Yes	no	no	-	-	-	10	10	17	mitochondrial outer membrane permeabilization; Rho GTPase cycle
	209	TRMT10C	Q7L0Y3	Mitochondrial ribonuclease P protein 1 OS=Homo sapiens GN=TRMT10C PE=1 SV=2	Yes	no	no	-	-	-	25	23	47	tRNA processing in the mitochondrion; rRNA processing in the mitochondrion; tRNA modification in the mitochondrion
	210	MRPL4	A0A024R7C5	Mitochondrial ribosomal protein L4, isoform CRA_a OS=Homo sapiens GN=MRPL4 PE=3 SV=1	Yes	no	no	-	-	-	21	14	28	Mitochondrial ribosomal protein L4; translation
	211	MRPS12	A0A024R0H2	Mitochondrial ribosomal protein S12, isoform CRA_a OS=Homo sapiens GN=MRPS12 PE=3 SV=1	Yes	no	no	-	-	-	4	4	33	Mitochondrial ribosomal protein S12; translation
	212	MRPS2	A0A024R8D4	Mitochondrial ribosomal protein S2, isoform CRA_a OS=Homo sapiens GN=MRPS2 PE=3 SV=1	Yes	no	no	-	-	-	42	27	35	Mitochondrial ribosomal protein S2; translation
	213	N/A	E5KSX8	Mitochondrial transcription factor A OS=Homo sapiens PE=4 SV=1	Yes	no	no	-	-	-	36	26	51	Mitochondrial transcription factor A; DNA binding
	214	PMPCA	Q10713	Mitochondrial-processing peptidase subunit alpha OS=Homo sapiens GN=PMPCA PE=1 SV=2	Yes	no	no	-	-	-	127	90	58	mitochondrial calcium ion transmembrane transport; protein processing involved in protein targeting to mitochondrion; proteolysis
	215	N/A	B0S7P4	MRPS18B OS=Homo sapiens PE=2 SV=1	Yes	no	no	-	-	-	27	13	48	28S ribosomal protein S18-2; mitochondrial translation
	216	ABHD10	Q9NUJ1	Mycophenolic acid acyl-glucuronide esterase, mitochondrial OS=Homo sapiens GN=ABHD10 PE=1 SV=1	Yes	Yes	no	-	-	-	13	12	30	Glucuronidation
	217	NADK2	Q4G0N4	NAD kinase 2, mitochondrial OS=Homo sapiens GN=NADK2 PE=1 SV=2	Yes	no	Yes	-	-	-	71	54	58	NADP biosynthetic process
	218	NQO1	P15559	NAD(P)H dehydrogenase [quinone] 1 OS=Homo sapiens GN=NQO1 PE=1 SV=1	Yes	no	no	-	-	-	13	10	25	NAD(P)H dehydrogenase (quinone) activity; aging; cell redox homeostasis; negative regulation of apoptotic process; response to electrical stimulus; response to estradiol; response to ethanol; response to hydrogen sulfide; response to nitrogen compound; response to nutrient; response to oxidative stress; response to toxic substance; xenobiotic metabolic process
	219	NDUFB10	A8K761	NADH dehydrogenase (Ubiquinone) 1 beta subcomplex, 10, 22kDa, isoform CRA_b OS=Homo sapiens GN=NDUFB10 PE=2 SV=1	Yes	no	no	-	-	-	9	7	49	NADH dehydrogenase [ubiquinone] 1 beta subcomplex subunit 10 (Complex I)
	220	NDUFA10	E7ESZ7	NADH dehydrogenase [ubiquinone] 1 alpha subcomplex subunit 10, mitochondrial OS=Homo sapiens GN=NDUFA10 PE=1 SV=1	Yes	no	no	-	-	-	17	15	37	NADH dehydrogenase [ubiquinone] 1 alpha subcomplex subunit 10 (Complex I)
	221	NDUFA3	O95167	NADH dehydrogenase [ubiquinone] 1 alpha subcomplex subunit 3 OS=Homo sapiens GN=NDUFA3 PE=1 SV=1	Yes	no	no	-	-	-	4	3	42	Respiratory electron transport; Complex I biogenesis
	222	NDUFB3	O43676	NADH dehydrogenase [ubiquinone] 1 beta subcomplex subunit 3 OS=Homo sapiens GN=NDUFB3 PE=1 SV=3	Yes	Yes	no	-	-	-	5	5	37	Respiratory electron transport; Complex I biogenesis
	223	NDUFB9	Q9Y6M9	NADH dehydrogenase [ubiquinone] 1 beta subcomplex subunit 9 OS=Homo sapiens GN=NDUFB9 PE=1 SV=3	Yes	no	no	-	-	-	6	5	37	Respiratory electron transport; Complex I biogenesis
	224	NDUFS2	O75306	NADH dehydrogenase [ubiquinone] iron-sulfur protein 2, mitochondrial OS=Homo sapiens GN=NDUFS2 PE=1 SV=2	Yes	no	no	-	-	-	100	57	46	NADH dehydrogenase [ubiquinone] iron-sulfur protein 2 (Complex I)
	225	NDUFS3	O75489	NADH dehydrogenase [ubiquinone] iron-sulfur protein 3, mitochondrial OS=Homo sapiens GN=NDUFS3 PE=1 SV=1	Yes	Yes	no	-	-	-	59	33	53	Respiratory electron transport; Complex I biogenesis
	226	NDUFS7	O75251	NADH dehydrogenase [ubiquinone] iron-sulfur protein 7, mitochondrial OS=Homo sapiens GN=NDUFS7 PE=1 SV=3	Yes	no	no	-	-	-	15	11	19	Respiratory electron transport; Complex I biogenesis
	227	NDUFS8	O00217	NADH dehydrogenase [ubiquinone] iron-sulfur protein 8, mitochondrial OS=Homo sapiens GN=NDUFS8 PE=1 SV=1	Yes	no	Yes	-	-	-	9	8	36	Electron transport, Respiratory chain, Transport
	228	CYB5R1	Q9UHQ9	NADH-cytochrome b5 reductase 1 OS=Homo sapiens GN=CYB5R1 PE=1 SV=1	Yes	no	no	-	-	-	5	4	15	Amino sugar and nucleotide sugar metabolism
	229	NADH4	B9EDU9	NADH-ubiquinone oxidoreductase chain 4 OS=Homo sapiens GN=NADH4 PE=3 SV=1	Yes	no	no	-	-	-	4	4	4	NADH-ubiquinone oxidoreductase chain 4 (Complex I)
	230	FDXR	A0A0A0MSZ4	NADPH:adrenodoxin oxidoreductase, mitochondrial OS=Homo sapiens GN=FDXR PE=1 SV=1	Yes	no	no	-	-	-	11	11	22	NADPH:adrenodoxin oxidoreductase; cholesterol metabolism
	231	NNT	A0A024R0C3	Nicotinamide nucleotide transhydrogenase, isoform CRA_a OS=Homo sapiens GN=NNT PE=4 SV=1	Yes	no	no	-	-	-	6	6	6	cell redox homeostasis; positive regulation of mitochondrial membrane potential; negative regulation of apoptotic process
	232	NIT1	Q86X76	Nitrilase homolog 1 OS=Homo sapiens GN=NIT1 PE=1 SV=2	Yes	no	no	-	-	-	15	12	22	nitrogen compound metabolic process
	233	NUDT6	P53370	Nucleoside diphosphate-linked moiety X motif 6 OS=Homo sapiens GN=NUDT6 PE=1 SV=2	Yes	no	Yes	-	-	-	7	7	25	regulation of cell cycle
	234	OAT	P04181	Ornithine aminotransferase, mitochondrial OS=Homo sapiens GN=OAT PE=1 SV=1	Yes	no	no	-	-	-	45	37	36	L-proline biosynthesis; cellular amino acid biosynthetic process; arginine catabolic process to glutamate; arginine catabolic process to proline via ornithine;
	235	CPOX	P36551	Oxygen-dependent coproporphyrinogen-III oxidase, mitochondrial OS=Homo sapiens GN=CPOX PE=1 SV=3	Yes	no	Yes	-	-	-	40	28	41	protoporphyrin-IX biosynthesis;
	236	SPG7	Q9UQ90	Paraplegin OS=Homo sapiens GN=SPG7 PE=1 SV=2	Yes	no	no	-	-	-	4	4	9	mitochondrial calcium ion transmembrane transport; apoptosis
	237	PTCD3	Q96EY7	Pentatricopeptide repeat domain-containing protein 3, mitochondrial OS=Homo sapiens GN=PTCD3 PE=1 SV=3	Yes	no	no	-	-	-	48	37	23	mitochondrial translation; protein folding (cis-trans isomerization of proline imidic peptide bonds in oligopeptides)
	238	N/A	B2R6X6	Peptidyl-prolyl cis-trans isomerase OS=Homo sapiens PE=2 SV=1	Yes	no	no	-	-	-	14	10	45	protein folding (cis-trans isomerization of proline imidic peptide bonds in oligopeptides)
	239	PTRH2	J3KQ48	Peptidyl-tRNA hydrolase 2, mitochondrial OS=Homo sapiens GN=PTRH2 PE=1 SV=1	Yes	no	no	-	-	-	6	6	54	Aminoacyl-tRNA hydrolase
	240	ETHE1	O95571	Persulfide dioxygenase ETHE1, mitochondrial OS=Homo sapiens GN=ETHE1 PE=1 SV=2	Yes	no	Yes	-	-	-	14	10	60	glutathione metabolic process;
	241	PGRMC1	Q6IB11	PGRMC1 protein OS=Homo sapiens GN=PGRMC1 PE=2 SV=1	Yes	no	no	-	-	-	15	12	36	Progesterone receptor membrane component 1
	242	SLC25A3	Q00325	Phosphate carrier protein, mitochondrial OS=Homo sapiens GN=SLC25A3 PE=1 SV=2	Yes	no	no	-	-	-	158	103	38	inorganic phosphate transmembrane transporter activity (transport of phosphate groups from the cytosol to the mitochondrial matrix)
	243	PCK2	Q16822	Phosphoenolpyruvate carboxykinase [GTP], mitochondrial OS=Homo sapiens GN=PCK2 PE=1 SV=3	Yes	no	no	-	-	-	51	48	30	gluconeogenesis; cellular response to glucose stimulus, insulin stimulus; glycerol biosynthetic process from pyruvate; response to starvation
	244	MTPAP	Q9NVV4	Poly(A) RNA polymerase, mitochondrial OS=Homo sapiens GN=MTPAP PE=1 SV=1	Yes	Yes	no	-	-	-	8	8	15	mRNA processing, Transcription
	245	POLDIP2	Q9Y2S7	Polymerase delta-interacting protein 2 OS=Homo sapiens GN=POLDIP2 PE=1 SV=1	Yes	Yes	no	-	-	-	16	13	25	positive regulation of mitotic cell cycle; negative regulation of macroautophagy; negative regulation of macroautophagy
	246	RARS2	Q5T160	Probable arginine--tRNA ligase, mitochondrial OS=Homo sapiens GN=RARS2 PE=1 SV=1	Yes	no	Yes	-	-	-	13	13	14	Mitochondrial tRNA aminoacylation
	247	LDHD	Q86WU2	Probable D-lactate dehydrogenase, mitochondrial OS=Homo sapiens GN=LDHD PE=1 SV=1	Yes	no	Yes	-	-	-	8	6	13	lactate catabolic process
	248	PHB2	Q99623	Prohibitin-2 OS=Homo sapiens GN=PHB2 PE=1 SV=2	Yes	no	no	-	-	-	50	32	58	stabilizes mitochondrial respiratory enzymes and maintains mitochondrial integrity in the IMM
	249	PCCA	P05165	Propionyl-CoA carboxylase alpha chain, mitochondrial OS=Homo sapiens GN=PCCA PE=1 SV=4	Yes	no	no	-	-	-	11	10	18	Lipid degradation, Lipid metabolism
	250	PCCB	E7EX59	Propionyl-CoA carboxylase beta chain, mitochondrial OS=Homo sapiens GN=PCCB PE=1 SV=1	Yes	no	no	-	-	-	4	4	8	Propionyl-CoA carboxylase beta chain, mitochondrial
	251	ABHD11	Q8NFV4	Protein ABHD11 OS=Homo sapiens GN=ABHD11 PE=1 SV=1	Yes	no	no	-	-	-	16	15	41	hydrolase activity
	252	PRKACA	A0A024R7J0	Protein kinase, cAMP-dependent, catalytic, alpha, isoform CRA_c OS=Homo sapiens GN=PRKACA PE=3 SV=1	Yes	no	no	-	-	-	9	9	15	cellular response to glucose stimulus
	253	NIPSNAP1	Q9BPW8	Protein NipSnap homolog 1 OS=Homo sapiens GN=NIPSNAP1 PE=1 SV=1	Yes	no	no	-	-	-	77	34	64	sensory perception of pain
	254	SCO1	O75880	Protein SCO1 homolog, mitochondrial OS=Homo sapiens GN=SCO1 PE=1 SV=1	Yes	Yes	Yes	-	-	-	13	9	29	Electron Transport Chain; Copper homeostasis
	255	IBA57	Q5T440	Putative transferase CAF17, mitochondrial OS=Homo sapiens GN=IBA57 PE=1 SV=1	Yes	Yes	no	-	-	-	10	3	24	Heme biosynthesis
	256	N/A	Q59ED7	Putative uncharacterized protein (Fragment) OS=Homo sapiens PE=2 SV=1	Yes	no	no	-	-	-	9	9	13	Uncharacterized protein; NADPH-hemoprotein reductase activity
	257	PYCR2	A0A0S2Z5U6	Pyrroline-5-carboxylate reductase (Fragment) OS=Homo sapiens GN=PYCR2 PE=2 SV=1	Yes	no	no	-	-	-	19	12	38	L-proline biosynthesis
	258	PC	A0A024R5C5	Pyruvate carboxylase OS=Homo sapiens GN=PC PE=4 SV=1	Yes	no	no	-	-	-	70	59	29	gluconeogenesis
	259	PDHB	P11177	Pyruvate dehydrogenase E1 component subunit beta, mitochondrial OS=Homo sapiens GN=PDHB PE=1 SV=3	Yes	no	Yes	-	-	-	13	12	33	Glycolysis and Gluconeogenesis; Tricarboxylic acid cycle
	260	RAB3D	O95716	Ras-related protein Rab-3D OS=Homo sapiens GN=RAB3D PE=1 SV=1	Yes	no	no	-	-	-	9	6	36	intracellular protein transport; regulation of exocytosis; positive regulation of regulated secretory pathway
	261	RMND1	Q9NWS8	Required for meiotic nuclear division protein 1 homolog OS=Homo sapiens GN=RMND1 PE=1 SV=2	Yes	no	no	-	-	-	9	9	13	positive regulation of mitochondrial translation
	262	RDH13	Q8NBN7	Retinol dehydrogenase 13 OS=Homo sapiens GN=RDH13 PE=1 SV=2	Yes	Yes	no	-	-	-	8	8	24	retinol metabolism
	263	RPUSD3	Q6P087	RNA pseudouridylate synthase domain-containing protein 3 OS=Homo sapiens GN=RPUSD3 PE=1 SV=3	Yes	no	no	-	-	-	7	6	15	mRNA processing; positive regulation of mitochondrial translation; pseudouridine synthesis
	264	LACTB	P83111	Serine beta-lactamase-like protein LACTB, mitochondrial OS=Homo sapiens GN=LACTB PE=1 SV=2	Yes	no	no	-	-	-	46	40	26	Lipid metabolism
	265	HTRA2	O43464	Serine protease HTRA2, mitochondrial OS=Homo sapiens GN=HTRA2 PE=1 SV=2	Yes	no	no	-	-	-	10	9	23	apoptosis;
	266	PGAM5	Q96HS1	Serine/threonine-protein phosphatase PGAM5, mitochondrial OS=Homo sapiens GN=PGAM5 PE=1 SV=2	Yes	no	no	-	-	-	90	58	55	Necrosis; macroautophagy
	267	SARS2	M0QWZ7	Serine--tRNA ligase, mitochondrial OS=Homo sapiens GN=SARS2 PE=1 SV=1	Yes	no	no	-	-	-	52	31	45	selenocysteinyl-tRNA(Sec) biosynthesis
	268	ACADSB	P45954	Short/branched chain specific acyl-CoA dehydrogenase, mitochondrial OS=Homo sapiens GN=ACADSB PE=1 SV=1	Yes	no	no	-	-	-	11	10	16	mitochondrial fatty acid beta-oxidation; branched-chain amino acid catabolic process
	269	SFXN1	Q9H9B4	Sideroflexin-1 OS=Homo sapiens GN=SFXN1 PE=1 SV=4	Yes	no	no	-	-	-	79	56	42	mitochondrial amino-acid transport
	270	SFXN2	Q96NB2	Sideroflexin-2 OS=Homo sapiens GN=SFXN2 PE=1 SV=2	Yes	no	no	-	-	-	14	13	24	mitochondrial transmembrane transport; serine import into mitochondrion
	271	SSBP1	Q04837	Single-stranded DNA-binding protein, mitochondrial OS=Homo sapiens GN=SSBP1 PE=1 SV=1	Yes	Yes	Yes	-	-	-	20	12	74	mitochondrial DNA replication
	272	SORD	Q00796	Sorbitol dehydrogenase OS=Homo sapiens GN=SORD PE=1 SV=4	Yes	no	no	-	-	-	9	8	13	Fructose biosynthesis; Formation of xylulose-5-phosphate
	273	SAMM50	Q9Y512	Sorting and assembly machinery component 50 homolog OS=Homo sapiens GN=SAMM50 PE=1 SV=3	Yes	no	no	-	-	-	32	15	44	Mitochondrial protein import; Cristae formation
	274	SLIRP	Q9GZT3	SRA stem-loop-interacting RNA-binding protein, mitochondrial OS=Homo sapiens GN=SLIRP PE=1 SV=1	Yes	no	no	-	-	-	24	10	76	Transcription, Transcription regulation; negative regulation of mitochondrial RNA catabolic process
	275	HSPA9	P38646	Stress-70 protein, mitochondrial OS=Homo sapiens GN=HSPA9 PE=1 SV=2	Yes	no	no	-	-	-	257	105	69	cellular response to unfolded protein; negative regulation of apoptotic process
	276	SDHA	A0A024QZ30	Succinate dehydrogenase [ubiquinone] flavoprotein subunit, mitochondrial OS=Homo sapiens GN=SDHA PE=3 SV=1	Yes	no	no	-	-	-	323	168	60	tricarboxylic acid cycle; electron transport chain (Complex II)
	277	SDHB	P21912	Succinate dehydrogenase [ubiquinone] iron-sulfur subunit, mitochondrial OS=Homo sapiens GN=SDHB PE=1 SV=3	Yes	no	no	-	-	-	42	28	40	Electron Transport Chain; TCA Cycle
	278	SDHAF2	Q9NX18	Succinate dehydrogenase assembly factor 2, mitochondrial OS=Homo sapiens GN=SDHAF2 PE=1 SV=1	Yes	no	no	-	-	-	4	3	18	tricarboxylic acid cycle; mitochondrial respiratory chain complex II assembly; mitochondrial electron transport, succinate to ubiquinone
	279	SUCLG1	P53597	Succinate--CoA ligase [ADP/GDP-forming] subunit alpha, mitochondrial OS=Homo sapiens GN=SUCLG1 PE=1 SV=4	Yes	no	no	-	-	-	31	16	30	TCA cycle
	280	SUCLA2	E5KS55	Succinate--CoA ligase [ADP-forming] subunit beta, mitochondrial OS=Homo sapiens GN=SUCLA2 PE=3 SV=1	Yes	no	no	-	-	-	23	21	49	tricarboxylic acid cycle;
	281	SUCLG2	Q96I99	Succinate--CoA ligase [GDP-forming] subunit beta, mitochondrial OS=Homo sapiens GN=SUCLG2 PE=1 SV=2	Yes	no	no	-	-	-	34	29	48	tricarboxylic acid cycle;
	282	OXCT1	P55809	Succinyl-CoA:3-ketoacid coenzyme A transferase 1, mitochondrial OS=Homo sapiens GN=OXCT1 PE=1 SV=1	Yes	no	Yes	-	-	-	10	9	13	Synthesis and Degradation of Ketone Bodies
	283	SURF1	E5KRX5	SURF1-like protein OS=Homo sapiens GN=SURF1 PE=2 SV=1	Yes	no	no	-	-	-	5	4	14	Component of the MITRAC (mitochondrial translation regulation assembly intermediate of cytochrome c oxidase complex) complex, that regulates cytochrome c oxidase assembly
	284	N/A	A0A140VJY2	Testicular tissue protein Li 209 OS=Homo sapiens PE=2 SV=1	Yes	no	no	-	-	-	66	50	39	negative regulation of intrinsic apoptotic signaling pathway in response to hydrogen peroxide; protein folding
	285	TTC19	A0A024RD83	Tetratricopeptide repeat domain 19, isoform CRA_a OS=Homo sapiens GN=TTC19 PE=4 SV=1	Yes	no	no	-	-	-	12	10	26	tricarboxylic acid cycle; mitochondrial respiratory chain complex III assembly
	286	PRDX3	P30048	Thioredoxin-dependent peroxide reductase, mitochondrial OS=Homo sapiens GN=PRDX3 PE=1 SV=3	Yes	no	Yes	-	-	-	34	7	37	cell redox homeostasis; negative regulation of apoptotic process; response to hydrogen peroxide; response to lipopolysaccharide; response to oxidative stress
	287	TARS2	Q9BW92	Threonine--tRNA ligase, mitochondrial OS=Homo sapiens GN=TARS2 PE=1 SV=1	Yes	no	Yes	-	-	-	39	35	44	Mitochondrial tRNA aminoacylation; Protein biosynthesis
	288	MTERF3	Q96E29	Transcription termination factor 3, mitochondrial OS=Homo sapiens GN=MTERF3 PE=1 SV=2	Yes	no	no	-	-	-	6	5	12	mitochondrial transcription
	289	TACO1	Q9BSH4	Translational activator of cytochrome c oxidase 1 OS=Homo sapiens GN=TACO1 PE=1 SV=1	Yes	no	no	-	-	-	12	10	30	TP53 Regulates Metabolic Genes; Respiratory electron transport
	290	TIMM50	Q0VAB1	Translocase of inner mitochondrial membrane 50 homolog (S. cerevisiae) OS=Homo sapiens GN=TIMM50 PE=2 SV=1	Yes	no	no	-	-	-	19	18	23	protein transport (component of the TIM23 complex)
	291	N/A	A8K032	Translocating chain-associated membrane protein OS=Homo sapiens PE=2 SV=1	Yes	no	no	-	-	-	12	10	13	SRP-dependent cotranslational protein targeting to membrane, translocation
	292	TMEM11	P17152	Transmembrane protein 11, mitochondrial OS=Homo sapiens GN=TMEM11 PE=1 SV=1	Yes	Yes	no	-	-	-	4	3	19	inner mitochondrial membrane organization
	293	TMEM160	Q9NX00	Transmembrane protein 160 OS=Homo sapiens GN=TMEM160 PE=1 SV=1	Yes	no	no	-	-	-	5	5	22	Transmembrane protein 160
	294	HADHB	P55084	Trifunctional enzyme subunit beta, mitochondrial OS=Homo sapiens GN=HADHB PE=1 SV=3	Yes	no	no	-	-	-	197	125	62	fatty acid beta-oxidation
	295	TRMT61B	Q9BVS5	tRNA (adenine(58)-N(1))-methyltransferase, mitochondrial OS=Homo sapiens GN=TRMT61B PE=1 SV=2	Yes	no	no	-	-	-	5	5	11	mitochondrial tRNA methylation; mRNA methylation
	296	WARS2	Q9UGM6	Tryptophan--tRNA ligase, mitochondrial OS=Homo sapiens GN=WARS2 PE=1 SV=1	Yes	no	no	-	-	-	6	6	18	protein biosynthesis (mitochondrial tryptophanyl-tRNA aminoacylation)
	297	PTPN1	P18031	Tyrosine-protein phosphatase non-receptor type 1 OS=Homo sapiens GN=PTPN1 PE=1 SV=1	Yes	no	no	-	-	-	5	5	12	Leptin signaling pathway; Prolactin Signaling Pathway; VEGFA-VEGFR2 Signaling Pathway; Angiopoietin Like Protein 8 Regulatory Pathway; Insulin Signaling
	298	YARS2	Q9Y2Z4	Tyrosine--tRNA ligase, mitochondrial OS=Homo sapiens GN=YARS2 PE=1 SV=2	Yes	no	Yes	-	-	-	28	25	21	Protein biosynthesis
	299	COQ6	Q9Y2Z9	Ubiquinone biosynthesis monooxygenase COQ6, mitochondrial OS=Homo sapiens GN=COQ6 PE=1 SV=2	Yes	no	no	-	-	-	4	4	9	ubiquinone biosynthesis
	300	N/A	M0R2C6	Uncharacterized protein (Fragment) OS=Homo sapiens PE=4 SV=1	Yes	no	no	-	-	-	18	16	24	protein biosynthesis (selenocysteinyl-tRNA(Sec) biosynthesis)
	301	N/A	F5H5P2	Uncharacterized protein OS=Homo sapiens PE=4 SV=1	Yes	no	no	-	-	-	11	10	16	branched-chain amino acid catabolic process
	302	VDAC2	A0A024QZN9	Voltage-dependent anion channel 2, isoform CRA_a OS=Homo sapiens GN=VDAC2 PE=4 SV=1	Yes	no	no	-	-	-	42	36	30	ion transport (voltage-gated anion channel activity)
	303	VDAC1	P21796	Voltage-dependent anion-selective channel protein 1 OS=Homo sapiens GN=VDAC1 PE=1 SV=2	Yes	no	no	-	-	-	31	24	55	apoptotic process; mitochondrial calcium ion transmembrane transport

## Sheet: MDA-MB-231
								HaloLink® Resin; pmOGT-HaloTag vs pHaloTag treatment			IP RL2; mOGT-HaloTag vs pCDII-mOGT-HaloTag and pHaloTag treatment
					Co-existence
Cell Line	Number	Gene	Accession Number	Protein name	MCF-7	MDA-MB-231	Hs 578t	Peptides	Unique peptides	Coverage (%)	Peptides	Unique peptides	Coverage (%)	Processes/Function
MDA-MB-231
	1	MRPS12	O15235	28S ribosomal protein S12, mitochondrial [OS=Homo sapiens]	no	Yes	no	16	7	16	1	1	22	translation, mitochondrial translation, mitochondrial translational elongation, mitochondrial translational termination,
	2	OXSM	Q9NWU1-1	3-oxoacyl-[acyl-carrier-protein] synthase, mitochondrial [OS=Homo sapiens]	no	Yes	Yes	26	10	26	2	2	10	fatty acid biosynthetic process, acyl-CoA metabolic process, metabolic process, short-chain fatty acid biosynthetic process, medium-chain fatty acid biosynthetic process,
	3	AGK	Q53H12	Acylglycerol kinase, mitochondrial [OS=Homo sapiens]	Yes	Yes	no	34	7	34	4	4	9	Glycerophospholipid biosynthesis
	4	ATP5MG	O75964	ATP synthase subunit g, mitochondrial [OS=Homo sapiens]	no	Yes	no	29	12	29	1	1	40	ATP biosynthetic process, ATP synthesis coupled proton transport, mitochondrial ATP synthesis coupled proton transport,
	5	CPT1C	Q8TCG5-1	Carnitine O-palmitoyltransferase 1, brain isoform [OS=Homo sapiens]	no	Yes	no	16	9	16	3	3	3	fatty acid beta-oxidation, carnitine metabolic process,
	6	COA4	Q9NYJ1-1	Cytochrome c oxidase assembly factor 4 homolog, mitochondrial [OS=Homo sapiens]	no	Yes	no	11	3	16	1	1	23	mitochondrial respiratory chain complex IV assembly,
	7	TSFM	P43897	Elongation factor Ts, mitochondrial [OS=Homo sapiens]	no	Yes	Yes	9	7	9	2	2	6	translational elongation, regulation of DNA-templated transcription, elongation, mitochondrial translational elongation,
	8	DECR1	Q16698-2	Isoform 2 of 2,4-dienoyl-CoA reductase, mitochondrial [OS=Homo sapiens]	no	Yes	no	7	4	7	2	2	6	fatty acid beta-oxidation, protein homotetramerization,
	9	MRPS27	Q92552-2	Isoform 2 of 28S ribosomal protein S27, mitochondrial [OS=Homo sapiens]	no	Yes	no	6	2	11	1	1	8	mitochondrial translational elongation, mitochondrial translational termination,
	10	AKAP1	Q92667-2	Isoform 2 of A-kinase anchor protein 1, mitochondrial [OS=Homo sapiens]	no	Yes	no	21	12	9	3	3	7	blood coagulation,regulation of protein kinase A signaling,
	11	ATP5PF	P18859-2	Isoform 2 of ATP synthase-coupling factor 6, mitochondrial [OS=Homo sapiens]	no	Yes	no	29	13	29	1	1	14	ATP biosynthetic process, ATP synthesis coupled proton transport, aromatic compound catabolic process, substantia nigra development, mitochondrial ATP synthesis coupled proton transport,
	12	COQ8A	Q8NI60-2	Isoform 2 of Atypical kinase COQ8A, mitochondrial [OS=Homo sapiens]	no	Yes	Yes	32	11	11	3	3	20	protein phosphorylation, ubiquinone biosynthetic process, phosphorylation,
	13	GATM	P50440-2	Isoform 2 of Glycine amidinotransferase, mitochondrial [OS=Homo sapiens]	no	Yes	no	10	2	12	1	1	6	creatine metabolic process, creatine biosynthetic process,
	14	MIEF1	Q9NQG6-2	Isoform 2 of Mitochondrial dynamics protein MID51 [OS=Homo sapiens]	no	Yes	no	4	1	24	1	1	21	mitochondrial fission, mitochondrial fusion, positive regulation of mitochondrial fission, positive regulation of protein targeting to membrane,
	15	MAPK1	P28482-2	Isoform 2 of Mitogen-activated protein kinase 1 [OS=Homo sapiens]	no	Yes	no	16	2	16	2	2	19	MAPK cascade, activation of MAPK activity, MAPK import into nucleus, transcription, DNA-templated, protein phosphorylation, apoptotic process, chemotaxis, response to stress, cellular response to DNA damage stimulus, cell cycle, signal transduction, chemical synaptic transmission, axon guidance, positive regulation of cell proliferation, fibroblast growth factor receptor signaling pathway, respon…
	16	NDUFA10	O95299-2	Isoform 2 of NADH dehydrogenase [ubiquinone] 1 alpha subcomplex subunit 10, mitochondrial [OS=Homo sapiens]	Yes	Yes	Yes	8	4	8	1	1	7	Electron transport; Respiratory Chain
	17	NDUFB11	Q9NX14-2	Isoform 2 of NADH dehydrogenase [ubiquinone] 1 beta subcomplex subunit 11, mitochondrial [OS=Homo sapiens]	no	Yes	no	6	2	19	1	1	31	mitochondrial electron transport, NADH to ubiquinone, mitochondrial respiratory chain complex I assembly,
	18	COX10	Q12887-2	Isoform 2 of Protoheme IX farnesyltransferase, mitochondrial [OS=Homo sapiens]	no	Yes	Yes	16	6	16	1	1	19	mitochondrial fission, mitochondrial electron transport, cytochrome c to oxygen, heme biosynthetic process, heme a biosynthetic process, respiratory chain complex IV assembly, aerobic respiration, cellular respiration, heme O biosynthetic process, hydrogen ion transmembrane transport,
	19	ACSS1	Q9NUB1-3	Isoform 3 of Acetyl-coenzyme A synthetase 2-like, mitochondrial [OS=Homo sapiens]	no	Yes	no	4	3	4	4	3	7	ethanol oxidation, acetyl-CoA biosynthetic process, metabolic process, acetate biosynthetic process, acetyl-CoA biosynthetic process from acetate, propionate biosynthetic process,
	20	ATP5MF	P56134-3	Isoform 3 of ATP synthase subunit f, mitochondrial [OS=Homo sapiens]	no	Yes	no	10	1	51	1	1	31	ATP biosynthetic process, proton transport, mitochondrial ATP synthesis coupled proton transport,
	21	TXNRD2	Q9NNW7-3	Isoform 3 of Thioredoxin reductase 2, mitochondrial [OS=Homo sapiens]	no	Yes	no	8	4	8	2	2	7	response to reactive oxygen species, response to oxygen radical, cell redox homeostasis, oxidation-reduction process, cellular oxidant detoxification,
	22	ABCB8	Q9NUT2-4	Isoform 4 of ATP-binding cassette sub-family B member 8, mitochondrial [OS=Homo sapiens]	no	Yes	no	27	7	27	6	6	6	transport, transmembrane transport,
	23	GTPBP3	Q969Y2-4	Isoform 4 of tRNA modification GTPase GTPBP3, mitochondrial [OS=Homo sapiens]	no	Yes	Yes	4	2	15	1	1	11	tRNA wobble uridine modification, tRNA methylation,
	24	BCAT2	O15382-2	Isoform B of Branched-chain-amino-acid aminotransferase, mitochondrial [OS=Homo sapiens]	no	Yes	no	4	1	6	3	3	6	aspartate biosynthetic process, isoleucine catabolic process, metabolic process, cellular amino acid biosynthetic process, branched-chain amino acid biosynthetic process, branched-chain amino acid catabolic process, leucine biosynthetic process, valine biosynthetic process, regulation of hormone levels,
	25	MSRB2	Q9Y3D2	Methionine-R-sulfoxide reductase B2, mitochondrial [OS=Homo sapiens]	Yes	Yes	Yes	18	11	10	1	1	21	Protein repair
	26	ALDH6A1	Q02252	Methylmalonate-semialdehyde dehydrogenase [acylating], mitochondrial [OS=Homo sapiens]	Yes	Yes	Yes	23	7	23	3	3	9	Branched-chain amino acid catabolism
	27	PLD6	Q8N2A8	mitochondrial cardiolipin hydrolase [OS=Homo sapiens]	no	Yes	Yes	12	7	12	1	1	13	meiotic nuclear division, spermatid development, mitochondrial fusion, positive regulation of mitochondrial fusion, lipid catabolic process, P granule organization, cardiolipin biosynthetic process, piRNA metabolic process, DNA methylation involved in gamete generation, RNA phosphodiester bond hydrolysis, endonucleolytic,
	28	MCCD1	P59942	Mitochondrial coiled-coil domain protein 1 [OS=Homo sapiens]	no	Yes	no	10	2	26	1	1	26	-
	29	TIMM17A	Q99595	Mitochondrial import inner membrane translocase subunit Tim17-A [OS=Homo sapiens]	no	Yes	Yes	20	12	20	1	1	18	protein targeting to mitochondrion, intracellular protein transport, protein import into mitochondrial matrix,
	30	TIMM50	Q3ZCQ8	Mitochondrial import inner membrane translocase subunit TIM50 [OS=Homo sapiens]	no	Yes	no	10	3	10	2	2	8	release of cytochrome c from mitochondria, protein dephosphorylation mitochondrial membrane organization, protein transport, protein import into mitochondrial matrix, peptidyl-tyrosine dephosphorylation,
	31	NDUFB5	O43674-1	NADH dehydrogenase [ubiquinone] 1 beta subcomplex subunit 5, mitochondrial [OS=Homo sapiens]	no	Yes	Yes	12	4	10	1	1	14	mitochondrial electron transport, NADH to ubiquinone, mitochondrial respiratory chain complex I assembly,
	32	NDUFS3	O75489	NADH dehydrogenase [ubiquinone] iron-sulfur protein 3, mitochondrial [OS=Homo sapiens]	Yes	Yes	no	13	12	13	1	1	19	Respiratory electron transport; Complex I biogenesis
	33	EXOG	Q9Y2C4	Nuclease EXOG, mitochondrial [OS=Homo sapiens]	no	Yes	no	13	4	7	1	1	10	nucleic acid phosphodiester bond hydrolysis,
	34	PET100	P0DJ07	Protein PET100 homolog, mitochondrial [OS=Homo sapiens]	no	Yes	no	24	3	24	6	6	40	mitochondrial respiratory chain complex IV assembly,
	35	LIPT2	A6NK58	Putative lipoyltransferase 2, mitochondrial [OS=Homo sapiens]	no	Yes	no	15	7	15	1	1	13	cellular protein modification process, lipoate biosynthetic process, protein lipoylation, glyoxylate metabolic process,
	36	RSAD1	Q9HA92	Radical S-adenosyl methionine domain-containing protein 1, mitochondrial [OS=Homo sapiens]	no	Yes	Yes	7	3	7	1	1	4	porphyrin-containing compound biosynthetic process, oxidation-reduction process,
	37	SHMT2	P34897-1	Serine hydroxymethyltransferase, mitochondrial [OS=Homo sapiens]	no	Yes	Yes	50	19	50	4	4	8	glycine metabolic process, L-serine metabolic process, L-serine biosynthetic process, one-carbon metabolic process, positive regulation of cell proliferation, glycine biosynthetic process from serine, response to type I interferon, tetrahydrofolate interconversion, tetrahydrofolate metabolic process, folic acid metabolic process, protein tetramerization, protein homotetramerization, protein K63-l…
	38	SLIRP	Q9GZT3-1	SRA stem-loop-interacting RNA-binding protein, mitochondrial [OS=Homo sapiens]	no	Yes	no	6	3	6	2	2	31	negative regulation of mitochondrial RNA catabolic process, transcription, DNA-templated, regulation of transcription, DNA-templated, spermatid development, single fertilization, sperm motility, mitochondrion morphogenesis,
	39	GUF1	Q8N442	translation factor GUF1, mitochondrial [OS=Homo sapiens]	no	Yes	Yes	24	8	24	1	1	3	translation, positive regulation of translation,
	40	WARS2	Q9UGM6-1	Tryptophan--tRNA ligase, mitochondrial [OS=Homo sapiens]	no	Yes	no	8	3	8	2	2	9	vasculogenesis, tRNA aminoacylation for protein translation, tryptophanyl-tRNA aminoacylation,
	41	MYG1	Q9HB07	UPF0160 protein MYG1, mitochondrial [OS=Homo sapiens]	no	Yes	no	18	12	18	2	2	6	locomotory exploration behavior, pigmentation,
	42	BCKDK	O14874	[3-methyl-2-oxobutanoate dehydrogenase [lipoamide]] kinase, mitochondrial [OS=Homo sapiens]	Yes	Yes	no	45	42	45	-		-	Branched-chain amino acid catabolism
	43	PDK1	Q15118	[Pyruvate dehydrogenase (Acetyl-transferring)] kinase isozyme 1, mitochondrial [OS=Homo sapiens]	Yes	Yes	Yes	39	32	39	-		-	Carbohydrate metabolism, Glucose metabolism
	44	MRPS17	Q9Y2R5	28S ribosomal protein S17, mitochondrial [OS=Homo sapiens]	no	Yes	Yes	22	1	16	-		-	translation, mitochondrial translation, mitochondrial translational elongation, mitochondrial translational termination,
	45	MRPS22	P82650	28S ribosomal protein S22, mitochondrial [OS=Homo sapiens]	Yes	Yes	no	29	9	29	-		-	Mitochondrial translation initiation; Mitochondrial translation elongation; Mitochondrial translation termination
	46	MRPS6	P82932	28S ribosomal protein S6, mitochondrial [OS=Homo sapiens]	no	Yes	Yes	7	3	17	-		-	translation, mitochondrial translation, mitochondrial translational elongation, mitochondrial translational termination,
	47	MRPL14	Q6P1L8	39S ribosomal protein L14, mitochondrial [OS=Homo sapiens]	Yes	Yes	no	15	4	15	-		-	translation
	48	MRPL20	Q9BYC9	39S ribosomal protein L20, mitochondrial [OS=Homo sapiens]	Yes	Yes	Yes	64	16	64	-		-	Mitochondrial translation initiation; Mitochondrial translation elongation; Mitochondrial translation termination
	49	MRPL40	Q9NQ50	39S ribosomal protein L40, mitochondrial [OS=Homo sapiens]	no	Yes	no	8	1	13	-		-	anatomical structure morphogenesis, mitochondrial translational elongation, mitochondrial translational termination,
	50	MRPL55	Q7Z7F7	39S ribosomal protein L55, mitochondrial [OS=Homo sapiens]	no	Yes	no	9	2	9	-		-	translation, mitochondrial translational elongation, mitochondrial translational termination,
	51	AK2	P54819	Adenylate kinase 2, mitochondrial [OS=Homo sapiens]	Yes	Yes	Yes	22	12	22	-		-	ATP, AMP metabolic, ADP biosynthesis
	52	ATP5MC1	P05496	ATP synthase F(0) complex subunit C1, mitochondrial [OS=Homo sapiens]	no	Yes	Yes	4	4	50	-		-	ATP biosynthetic process, ATP synthesis coupled proton transport,GO:0015991~ATP hydrolysis coupled proton transport,GO:0042776~mitochondrial ATP synthesis coupled proton transport,
	53	BCAT2	O15382	Branched-chain-amino-acid aminotransferase, mitochondrial [OS=Homo sapiens]	Yes	Yes	Yes	36	12	36	-		-	Amino-acid biosynthesis, Branched-chain amino acid biosynthesis
	54	CISD3	P0C7P0	CDGSH iron-sulfur domain-containing protein 3, mitochondrial [OS=Homo sapiens]	no	Yes	no	9	1	17	-		-	protein maturation by [2Fe-2S] cluster transfer
	55	TIMMDC1	Q9NPL8	Complex I assembly factor TIMMDC1, mitochondrial [OS=Homo sapiens]	Yes	Yes	Yes	31	11	31	-		-	mitochondrial respiratory chain complex I assembly
	56	NDUFAF1	Q9Y375	Complex I intermediate-associated protein 30, mitochondrial [OS=Homo sapiens]	Yes	Yes	Yes	37	16	37	-		-	Complex I biogenesis
	57	UQCRC1	P31930	Cytochrome b-c1 complex subunit 1, mitochondrial [OS=Homo sapiens]	Yes	Yes	Yes	47	10	47	-		-	Electron Transport Chain
	58	COA3	Q9Y2R0	Cytochrome c oxidase assembly factor 3 homolog, mitochondrial [OS=Homo sapiens]	no	Yes	no	41	13	41	-		-	mitochondrial respiratory chain complex IV assembly, positive regulation of mitochondrial translation,
	59	COX7A1	P24310	Cytochrome c oxidase subunit 7A1, mitochondrial [OS=Homo sapiens]	no	Yes	no	9	1	15	-		-	generation of precursor metabolites and energy, hydrogen ion transmembrane transport,
	60	ECSIT	Q9BQ95	Evolutionarily conserved signaling intermediate in Toll pathway, mitochondrial [OS=Homo sapiens]	Yes	Yes	no	21	11	21	-		-	MAPK signaling pathway; IL-1 signaling pathway
	61	FDX2	Q6P4F2	Ferredoxin-2, mitochondrial [OS=Homo sapiens]	no	Yes	Yes	6	2	32	-		-	C21-steroid hormone biosynthetic process, sterol metabolic process, small molecule metabolic process, oxidation-reduction process,
	62	GATB	O75879	Glutamyl-tRNA(Gln) amidotransferase subunit B, mitochondrial [OS=Homo sapiens]	Yes	Yes	Yes	17	8	17	-		-	Protein biosynthesis
	63	GRPEL1	Q9HAV7	GrpE protein homolog 1, mitochondrial [OS=Homo sapiens]	Yes	Yes	no	17	7	17	-		-	protein import into mitochondrial matrix
	64	ISCU	Q9H1K1	Iron-sulfur cluster assembly enzyme ISCU, mitochondrial [OS=Homo sapiens]	no	Yes	Yes	6	2	31	-		-	cellular iron ion homeostasis, nitrogen fixation, iron-sulfur cluster assembly, small molecule metabolic process, [2Fe-2S] cluster assembly, protein maturation by iron-sulfur cluster transfer,
	65	MRPS16	Q9Y3D3-2	Isoform 2 of 28S ribosomal protein S16, mitochondrial [OS=Homo sapiens]	no	Yes	no	7	3	7	-		-	translation, mitochondrial translation, mitochondrial translational elongation, mitochondrial translational termination,
	66	OGDHL	Q9ULD0-2	Isoform 2 of 2-oxoglutarate dehydrogenase-like, mitochondrial [OS=Homo sapiens]	no	Yes	no	17	5	17	-		-	glycolytic process, tricarboxylic acid cycle,
	67	ACSM3	Q53FZ2-2	Isoform 2 of Acyl-coenzyme A synthetase ACSM3, mitochondrial [OS=Homo sapiens]	no	Yes	no	7	4	7	-		-	fatty acid biosynthetic process, acyl-CoA metabolic process, metabolic process, regulation of blood pressure, cholesterol homeostasis,
	68	FAHD1	Q6P587-2	Isoform 2 of Acylpyruvase FAHD1, mitochondrial [OS=Homo sapiens]	no	Yes	no	39	3	39	-		-	metabolic process,
	69	AIFM1	O95831-2	Isoform 2 of Apoptosis-inducing factor 1, mitochondrial [OS=Homo sapiens]	no	Yes	no	10	2	7	-		-	response to ischemia,DNA catabolic process, apoptotic process, activation of cysteine-type endopeptidase activity involved in apoptotic process, response to toxic substance, neuron differentiation, chromosome condensation, mitochondrial respiratory chain complex I assembly, positive regulation of apoptotic process, positive regulation of neuron apoptotic process, cell redox homeostasis, neuron ap…
	70	SLC25A14	O95258-2	Isoform 2 of Brain mitochondrial carrier protein 1 [OS=Homo sapiens]	no	Yes	Yes	16	5	30	-		-	translation, transport, mitochondrial transport, aerobic respiration, proton transport,
	71	MCU	Q8NE86-2	Isoform 2 of Calcium uniporter protein, mitochondrial [OS=Homo sapiens]	no	Yes	no	7	4	7	-		-	mitochondrial calcium ion transport, calcium-mediated signaling, positive regulation of insulin secretion, protein complex oligomerization, calcium ion transmembrane import into mitochondrion, glucose homeostasis, positive regulation of mitochondrial calcium ion concentration,
	72	COX11	Q9Y6N1-2	Isoform 2 of Cytochrome c oxidase assembly protein COX11, mitochondrial [OS=Homo sapiens]	no	Yes	no	4	1	14	-		-	respiratory gaseous exchange, respiratory chain complex IV assembly, aerobic respiration, negative regulation of glucokinase activity, hydrogen ion transmembrane transport,
	73	DHRS2	Q13268-2	Isoform 2 of Dehydrogenase/reductase SDR family member 2, mitochondrial [OS=Homo sapiens]	no	Yes	no	4	2	17	-		-	C21-steroid hormone metabolic process, negative regulation of cell proliferation, response to toxic substance, cellular response to oxidative stress, myeloid dendritic cell differentiation, negative regulation of apoptotic process, oxidation-reduction process,
	74	DUT	P33316-2	Isoform 2 of Deoxyuridine 5'-triphosphate nucleotidohydrolase, mitochondrial [OS=Homo sapiens]	no	Yes	no	9	4	32	-		-	nucleobase-containing compound metabolic process, dUMP biosynthetic process, DNA replication, dUTP metabolic process, dUTP catabolic process, pyrimidine nucleoside biosynthetic process,
	75	DIABLO	Q9NR28-2	Isoform 2 of Diablo homolog, mitochondrial [OS=Homo sapiens]	no	Yes	no	8	1	11	-		-	apoptotic process, activation of cysteine-type endopeptidase activity involved in apoptotic process, extrinsic apoptotic signaling pathway via death domain receptors, intrinsic apoptotic signaling pathway in response to oxidative stress, activation of cysteine-type endopeptidase activity involved in apoptotic process by cytochrome c, positive regulation of apoptotic process, neuron apoptotic proc…
	76	ECHDC3	Q96DC8-2	Isoform 2 of Enoyl-CoA hydratase domain-containing protein 3, mitochondrial [OS=Homo sapiens]	no	Yes	no	7	1	22	-		-	metabolic process,
	77	LONP1	P36776-2	Isoform 2 of Lon protease homolog, mitochondrial [OS=Homo sapiens]	no	Yes	no	10	3	10	-		-	mitochondrial genome maintenance, response to hypoxia, misfolded or incompletely synthesized protein catabolic process, mitochondrion organization, aging, response to hormone, response to aluminum ion, protein catabolic process, mitochondrial DNA metabolic process, cellular response to oxidative stress, chaperone-mediated protein complex assembly, protein homooligomerization, proteolysis involved…
	78	MTFR1L	Q9H019-2	Isoform 2 of Mitochondrial fission regulator 1-like [OS=Homo sapiens]	no	Yes	no	10	2	17	-		-	mitochondrial fission, aerobic respiration,
	79	TIMM50	Q3ZCQ8-2	Isoform 2 of Mitochondrial import inner membrane translocase subunit TIM50 [OS=Homo sapiens]	no	Yes	no	8	2	9	-		-	release of cytochrome c from mitochondria, protein dephosphorylation mitochondrial membrane organization, protein transport, protein import into mitochondrial matrix, peptidyl-tyrosine dephosphorylation,
	80	LETM1	O95202-2	Isoform 2 of Mitochondrial proton/calcium exchanger protein [OS=Homo sapiens]	no	Yes	no	20	1	16	-		-	cellular metal ion homeostasis, cristae formation,
	81	RHOT2	Q8IXI1-2	Isoform 2 of Mitochondrial Rho GTPase 2 [OS=Homo sapiens]	no	Yes	Yes	4	4	52	-		-	small GTPase mediated signal transduction, cellular homeostasis, mitochondrion transport along microtubule, regulation of small GTPase mediated signal transduction, mitochondrial outer membrane permeabilization,
	82	SLC25A19	Q9HC21-2	Isoform 2 of Mitochondrial thiamine pyrophosphate carrier [OS=Homo sapiens]	no	Yes	no	6	1	15	-		-	translation, transport, deoxynucleotide transport, transmembrane transport,
	83	SLC25A28	Q96A46-2	Isoform 2 of Mitoferrin-2 [OS=Homo sapiens]	no	Yes	no	10	1	11	-		-	translation, transport, iron ion homeostasis ferrous iron transmembrane transport,
	84	NDUFS2	O75306-2	Isoform 2 of NADH dehydrogenase [ubiquinone] iron-sulfur protein 2, mitochondrial [OS=Homo sapiens]	no	Yes	Yes	11	2	8	-		-	mitochondrial electron transport, NADH to ubiquinone, response to oxidative stress, mitochondrial respiratory chain complex I assembly,
	85	NME4	O00746-2	Isoform 2 of Nucleoside diphosphate kinase, mitochondrial [OS=Homo sapiens]	no	Yes	no	4	2	4	-		-	purine nucleotide metabolic process, nucleoside diphosphate phosphorylation, GTP biosynthetic process, pyrimidine nucleotide metabolic process, UTP biosynthetic process, CTP biosynthetic process, lipid transport, nucleoside metabolic process, nucleoside triphosphate biosynthetic process, nucleobase-containing small molecule interconversion, regulation of apoptotic process,
	86	PGAM5	Q96HS1-2	Isoform 2 of Serine/threonine-protein phosphatase PGAM5, mitochondrial [OS=Homo sapiens]	no	Yes	no	6	1	8	-		-	protein dephosphorylation, signal transduction, positive regulation of GTPase activity, necroptotic process,
	87	SDHA	P31040-2	Isoform 2 of Succinate dehydrogenase [ubiquinone] flavoprotein subunit, mitochondrial [OS=Homo sapiens]	no	Yes	Yes	13	2	7	-		-	tricarboxylic acid cycle, succinate metabolic process, mitochondrial electron transport, succinate to ubiquinone, nervous system development, anaerobic respiration, electron transport chain, respiratory electron transport chain oxidation-reduction process,
	88	CMPK2	Q5EBM0-2	Isoform 2 of UMP-CMP kinase 2, mitochondrial [OS=Homo sapiens]	no	Yes	no	4	2	23	-		-	nucleoside diphosphate phosphorylation, dUDP biosynthetic process, dTDP biosynthetic process, dTTP biosynthetic process, nucleoside triphosphate biosynthetic process, cellular response to lipopolysaccharide,
	89	VDAC3	Q9Y277-2	Isoform 2 of Voltage-dependent anion-selective channel protein 3 [OS=Homo sapiens]	Yes	Yes	no	11	3	11	-		-	voltage-gated anion channel activity
	90	MRPL22	Q9NWU5-3	Isoform 3 of 39S ribosomal protein L22, mitochondrial [OS=Homo sapiens]	no	Yes	no	7	1	20	-		-	translation, mitochondrial translational elongation, mitochondrial translational termination,
	91	FAHD1	Q6P587-3	Isoform 3 of Acylpyruvase FAHD1, mitochondrial [OS=Homo sapiens]	no	Yes	no	7	6	7	-		-	metabolic process,
	92	DGUOK	Q16854-3	Isoform 3 of Deoxyguanosine kinase, mitochondrial [OS=Homo sapiens]	no	Yes	no	12	1	11	-		-	protein phosphorylation, guanosine metabolic process, deoxyribonucleoside monophosphate biosynthetic process, nucleotide biosynthetic process, negative regulation of neuron projection development, purine-containing compound salvage, dGTP metabolic process, purine deoxyribonucleoside metabolic process,
	93	ENOSF1	Q7L5Y1-3	Isoform 3 of Mitochondrial enolase superfamily member 1 [OS=Homo sapiens]	no	Yes	no	17	1	26	-		-	metabolic process, cellular amino acid catabolic process, cellular carbohydrate catabolic process,
	94	TOMM5	Q8N4H5-3	Isoform 3 of Mitochondrial import receptor subunit TOM5 homolog [OS=Homo sapiens]	no	Yes	no	17	2	35	-		-	protein targeting to mitochondrion, macroautophagy,
	95	TRMU	O75648-3	Isoform 3 of Mitochondrial tRNA-specific 2-thiouridylase 1 [OS=Homo sapiens]	no	Yes	Yes	60	1	27	-		-	tRNA wobble position uridine thiolation, tRNA processing, mitochondrial tRNA thio-modification,
	96	NADK2	Q4G0N4-3	Isoform 3 of NAD kinase 2, mitochondrial [OS=Homo sapiens]	no	Yes	no	4	4	41	-		-	NADP biosynthetic process, phosphorylation, NAD metabolic process,
	97	PTCD2	Q8WV60-3	Isoform 3 of Pentatricopeptide repeat-containing protein 2, mitochondrial [OS=Homo sapiens]	no	Yes	Yes	4	4	32	-		-	kidney development, liver development, mRNA processing, mitochondrion organization, muscle fiber development, regulation of mRNA processing, ventricular cardiac muscle tissue morphogenesis,
	98	ZDHHC8	Q9ULC8-3	Isoform 3 of Probable palmitoyltransferase ZDHHC8 [OS=Homo sapiens]	no	Yes	no	7	1	3	-		-	locomotory behavior, protein palmitoylation, lipoprotein metabolic process, regulation of mitophagy, positive regulation of protein targeting to mitochondrion,
	99	MRS2	Q9HD23-4	Isoform 4 of Magnesium transporter MRS2 homolog, mitochondrial [OS=Homo sapiens]	Yes	Yes	Yes	10	9	43	-		-	Miscellaneous transport and binding events
	100	RHOT1	Q8IXI2-4	Isoform 4 of Mitochondrial Rho GTPase 1 [OS=Homo sapiens]	no	Yes	no	5	1	5	-		-	mitochondrion organization, small GTPase mediated signal transduction, cellular homeostasis, mitochondrion transport along microtubule, regulation of small GTPase mediated signal transduction, mitochondrial outer membrane permeabilization,
	101	DGUOK	Q16854-5	Isoform 5 of Deoxyguanosine kinase, mitochondrial [OS=Homo sapiens]	no	Yes	no	4	1	11	-		-	protein phosphorylation, guanosine metabolic process, deoxyribonucleoside monophosphate biosynthetic process, nucleotide biosynthetic process, negative regulation of neuron projection development, purine-containing compound salvage, dGTP metabolic process, purine deoxyribonucleoside metabolic process,
	102	TMLHE	Q9NVH6-8	Isoform 8 of Trimethyllysine dioxygenase, mitochondrial [OS=Homo sapiens]	Yes	Yes	Yes	12	1	3	-		-	carnitine biosynthesis
	103	NFS1	Q9Y697-2	Isoform Cytoplasmic of Cysteine desulfurase, mitochondrial [OS=Homo sapiens]	no	Yes	no	12	2	12	-		-	sulfur amino acid metabolic process, protein complex assembly, Mo-molybdopterin cofactor biosynthetic process, iron incorporation into metallo-sulfur cluster, molybdopterin cofactor biosynthetic process, small molecule metabolic process, 2Fe-2S] cluster assembly,
	104	ERAL1	O75616-2	Isoform HERA-B of GTPase Era, mitochondrial [OS=Homo sapiens]	no	Yes	Yes	17	2	24	-		-	ribosomal small subunit assembly,
	105	GATD3A	P30042-2	Isoform Short of ES1 protein homolog, mitochondrial [OS=Homo sapiens]	no	Yes	no	16	2	16	-		-	-
	106	LYRM4	Q9HD34	LYR motif-containing protein 4 [OS=Homo sapiens]	Yes	Yes	no	7	1	24	-		-	Mitochondrial iron-sulfur cluster biogenesis
	107	AUH	Q13825	methylglutaconyl-CoA hydratase, mitochondrial [OS=Homo sapiens]	Yes	Yes	Yes	11	5	11	-		-	Branched-chain amino acid catabolism
	108	MTFP1	Q9UDX5	Mitochondrial fission process protein 1 [OS=Homo sapiens]	no	Yes	no	4	1	24	-		-	mitochondrial fission, apoptotic process,
	109	TIMM23	O14925	Mitochondrial import inner membrane translocase subunit tim23 [OS=Homo sapiens]	no	Yes	no	11	2	11	-		-	protein targeting to mitochondrion, protein import into mitochondrial matrix,
	110	TIMM8A	O60220	Mitochondrial import inner membrane translocase subunit Tim8 A [OS=Homo sapiens]	no	Yes	Yes	5	1	32	-		-	nervous system development, chaperone-mediated protein transport,
	111	ABHD10	Q9NUJ1	Mycophenolic acid acyl-glucuronide esterase, mitochondrial [OS=Homo sapiens]	Yes	Yes	no	20	12	20	-		-	Glucuronidation
	112	NDUFB3	O43676	NADH dehydrogenase [ubiquinone] 1 beta subcomplex subunit 3 [OS=Homo sapiens]	Yes	Yes	no	4	1	20	-		-	Respiratory electron transport; Complex I biogenesis
	113	UQCRFS1P1	P0C7P4	Putative cytochrome b-c1 complex subunit Rieske-like protein 1 [OS=Homo sapiens]	Yes	Yes	no	40	3	40	-		-	mitochondrial electron transport, ubiquinol to cytochrome c
	114	IBA57	Q5T440	Putative transferase CAF17, mitochondrial [OS=Homo sapiens]	Yes	Yes	no	20	3	20	-		-	Heme biosynthesis
	115	SDHAF1	A6NFY7	succinate dehydrogenase assembly factor 1, mitochondrial [OS=Homo sapiens]	no	Yes	Yes	11	3	11	-		-	mitochondrial respiratory chain complex II assembly,
	116	TMEM11	P17152	Transmembrane protein 11, mitochondrial [OS=Homo sapiens]	Yes	Yes	no	7	1	12	-		-	inner mitochondrial membrane organization
	117	VDAC3	Q9Y277	Voltage-dependent anion-selective channel protein 3 [OS=Homo sapiens]	Yes	Yes	no	26	9	26	-		-	voltage-gated anion channel activity
	118	MRPL13	Q9BYD1	39S ribosomal protein L13, mitochondrial [OS=Homo sapiens]	no	Yes	Yes	-	-	-	2	2	19	translation, mitochondrial translational elongation, mitochondrial translational termination,
	119	MRPL22	Q9NWU5	39S ribosomal protein L22, mitochondrial [OS=Homo sapiens]	no	Yes	Yes	-	-	-	2	2	12	translation, mitochondrial translational elongation, mitochondrial translational termination,
	120	MRPL24	Q96A35	39S ribosomal protein L24, mitochondrial [OS=Homo sapiens]	Yes	Yes	Yes	-	-	-	2	2	14	Mitochondrial translation initiation; Mitochondrial translation elongation; Mitochondrial translation termination
	121	MRPL28	Q13084	39S ribosomal protein L28, mitochondrial [OS=Homo sapiens]	Yes	Yes	Yes	-	-	-	4	4	15	Mitochondrial translation initiation; Mitochondrial translation elongation; Mitochondrial translation termination
	122	MRPL42	Q9Y6G3	39S ribosomal protein L42, mitochondrial [OS=Homo sapiens]	no	Yes	Yes	-	-	-	2	2	9	translation, mitochondrial translational elongation, mitochondrial translational termination,
	123	MRPL54	Q6P161	39S ribosomal protein L54, mitochondrial [OS=Homo sapiens]	no	Yes	no	-	-	-	2	2	16	mitochondrial translational elongation, mitochondrial translational termination,
	124	ACSS3	Q9H6R3	Acyl-CoA synthetase short-chain family member 3, mitochondrial [OS=Homo sapiens]	Yes	Yes	no	-	-	-	11	11	14	Synthesis of Ketone Bodies
	125	ATPAF1	Q5TC12-1	ATP synthase mitochondrial F1 complex assembly factor 1 [OS=Homo sapiens]	no	Yes	Yes	-	-	-	3	3	10	protein complex assembly, mitochondrial proton-transporting ATP synthase complex assembly,
	126	ATP5MPL	P56378	ATP synthase subunit ATP5MPL, mitochondrial	no	Yes	no	-	-	-	3	3	32	Mitochondrial membrane ATP synthase (F1F0 ATP synthase or Complex V)
	127	ATP5MG	O75964	ATP synthase subunit g, mitochondrial [OS=Homo sapiens]	no	Yes	no	-	-	-	2	2	40	ATP biosynthetic process, ATP synthesis coupled proton transport, mitochondrial ATP synthesis coupled proton transport,
	128	CS	O75390	citrate synthase, mitochondrial [OS=Homo sapiens]	Yes	Yes	Yes	-	-	-	4	4	5	Amino Acid metabolism; TCA Cycle
	129	BDH1	Q02338	D-beta-hydroxybutyrate dehydrogenase, mitochondrial [OS=Homo sapiens]	Yes	Yes	Yes	-	-	-	3	3	8	Synthesis and Degradation of Ketone Bodies
	130	TUFM	P49411	elongation factor Tu, mitochondrial [OS=Homo sapiens]	Yes	Yes	no	-	-	-	9	9	16	Mitochondrial translation elongation
	131	ECHS1	P30084	Enoyl-CoA hydratase, mitochondrial [OS=Homo sapiens]	Yes	Yes	Yes	-	-	-	6	6	11	Fatty Acid Beta Oxidation; Fatty Acid Biosynthesis; Tryptophan metabolism
	132	GLRX2	Q9NS18	Glutaredoxin-2, mitochondrial [OS=Homo sapiens]	no	Yes	Yes	-	-	-	2	2	18	regulation of transcription, DNA-templated, glutathione metabolic process, apoptotic process, aging, response to temperature stimulus, regulation of signal transduction, response to organic substance, cell differentiation, DNA protection, response to hydrogen peroxide, cell redox homeostasis, response to redox state, oxidation-reduction process, cellular response to superoxide,
	133	IFI27	P40305	Interferon alpha-inducible protein 27, mitochondrial [OS=Homo sapiens]	no	Yes	no	-	-	-	3	3	71	negative regulation of transcription from RNA polymerase II promoter, activation of cysteine-type endopeptidase activity involved in apoptotic process, response to estradiol, response to cytokine, regulation of protein export from nucleus,maternal process involved in female pregnancy, type I interferon signaling pathway,apoptotic signaling pathway,
	134	HSCB	Q8IWL3	iron-sulfur cluster co-chaperone protein HscB, mitochondrial [OS=Homo sapiens]	Yes	Yes	no	-	-	-	4	4	21	Mitochondrial protein import; Mitochondrial iron-sulfur cluster biogenesis
	135	BCKDHA	P12694-2	Isoform 2 of 2-oxoisovalerate dehydrogenase subunit alpha, mitochondrial [OS=Homo sapiens]	no	Yes	Yes	-	-	-	2	2	7	branched-chain amino acid catabolic process, glyoxylate metabolic process, oxidation-reduction process,
	136	MRPL30	Q8TCC3-2	Isoform 2 of 39S ribosomal protein L30, mitochondrial [OS=Homo sapiens]	Yes	Yes	Yes	-	-	-	6	6	28	Mitochondrial translation initiation; Mitochondrial translation elongation; Mitochondrial translation termination
	137	COQ10B	Q9H8M1-2	Isoform 2 of Coenzyme Q-binding protein COQ10 homolog B, mitochondrial [OS=Homo sapiens]	no	Yes	Yes	-	-	-	2	2	23	ubiquinone biosynthetic process, cellular respiration,
	138	CYP11B1	P15538-2	Isoform 2 of Cytochrome P450 11B1, mitochondrial [OS=Homo sapiens]	no	Yes	no	-	-	-	2	2	11	C21-steroid hormone biosynthetic process, glucocorticoid biosynthetic process, immune response, cholesterol metabolic process, regulation of blood pressure, sterol metabolic process, aldosterone biosynthetic process, cellular response to hormone stimulus, cortisol biosynthetic process, cellular response to potassium ion, glucose homeostasis, secondary metabolite biosynthetic process, oxidation-re…
	139	ALDH4A1	P30038-2	Isoform 2 of Delta-1-pyrroline-5-carboxylate dehydrogenase, mitochondrial [OS=Homo sapiens]	no	Yes	no	-	-	-	2	2	10	glutamate biosynthetic process, proline metabolic process, proline biosynthetic process, proline catabolic process, proline catabolic process to glutamate, 4-hydroxyproline catabolic process, oxidation-reduction process,
	140	FASTKD1	Q53R41-2	Isoform 2 of FAST kinase domain-containing protein 1, mitochondrial [OS=Homo sapiens]	no	Yes	Yes	-	-	-	3	3	7	protein phosphorylation, cellular respiration,
	141	MAPK3	P27361-2	Isoform 2 of Mitogen-activated protein kinase 3 [OS=Homo sapiens]	no	Yes	no	-	-	-	3	3	17	MAPK cascade, activation of MAPK activity, MAPK import into nucleus, positive regulation of protein phosphorylation, transcription, DNA-templated, transcription initiation from RNA polymerase I promoter, protein complex assembly, protein phosphorylation, apoptotic process, cellular response to DNA damage stimulus, DNA damage induced protein phosphorylation, cell cycle, axon guidance, fibroblast g…
	142	MAP3K21	Q5TCX8-2	Isoform 2 of Mitogen-activated protein kinase kinase kinase 21 [OS=Homo sapiens]	no	Yes	no	-	-	-	4	4	8	activation of MAPKK activity, protein phosphorylation, activation of JUN kinase activity, protein autophosphorylation,
	143	NDUFS7	O75251-2	Isoform 2 of NADH dehydrogenase [ubiquinone] iron-sulfur protein 7, mitochondrial [OS=Homo sapiens]	no	Yes	Yes	-	-	-	5	5	38	mitochondrial electron transport, NADH to ubiquinone, mitochondrial respiratory chain complex I assembly, oxidation-reduction process,
	144	SLIRP	Q9GZT3-2	Isoform 2 of SRA stem-loop-interacting RNA-binding protein, mitochondrial [OS=Homo sapiens]	no	Yes	Yes	-	-	-	2	2	30	negative regulation of mitochondrial RNA catabolic process, transcription, DNA-templated, regulation of transcription, DNA-templated, spermatid development, single fertilization, sperm motility, mitochondrion morphogenesis,
	145	TWNK	Q96RR1-2	Isoform 2 of Twinkle protein, mitochondrial [OS=Homo sapiens]	no	Yes	no	-	-	-	3	3	12	DNA replication, mitochondrial DNA replication, DNA unwinding involved in DNA replication, transcription from mitochondrial promoter, mitochondrion organization, protein hexamerization, protein homooligomerization, cellular response to glucose stimulus,
	146	C10orf67	Q8IYJ2-2	Isoform 2 of Uncharacterized protein C10orf67, mitochondrial [OS=Homo sapiens]	no	Yes	Yes	-	-	-	2	2	23	mitochondrion organization, small GTPase mediated signal transduction, cellular homeostasis, mitochondrion transport along microtubule, regulation of small GTPase mediated signal transduction, mitochondrial outer membrane permeabilization,
	147	ACSF2	Q96CM8-3	Isoform 3 of Acyl-CoA synthetase family member 2, mitochondrial [OS=Homo sapiens]	no	Yes	Yes	-	-	-	3	3	10	fatty acid metabolic process, metabolic process, long-chain fatty-acyl-CoA biosynthetic process,
	148	DMAC2L	Q99766-3	Isoform 3 of ATP synthase subunit s, mitochondrial [OS=Homo sapiens]	no	Yes	no	-	-	-	2	2	22	ATP biosynthetic process, proton transport, mitochondrial ATP synthesis coupled proton transport,
	149	AK3	Q9UIJ7-3	Isoform 3 of GTP:AMP phosphotransferase AK3, mitochondrial [OS=Homo sapiens]	no	Yes	no	-	-	-	2	2	34	ADP biosynthetic process, blood coagulation, phosphorylation, AMP metabolic process, GTP metabolic process, ITP metabolic process, UTP metabolic process,
	150	METTL17	Q9H7H0-3	Isoform 3 of Methyltransferase-like protein 17, mitochondrial [OS=Homo sapiens]	no	Yes	Yes	-	-	-	2	2	5	translation, respiratory chain complex IV assembly, aerobic respiration, methylation,
	151	MFN1	Q8IWA4-3	Isoform 3 of Mitofusin-1 [OS=Homo sapiens]	no	Yes	no	-	-	-	2	2	7	mitochondrial fusion, macroautophagy,
	152	PCCA	P05165-3	Isoform 3 of Propionyl-CoA carboxylase alpha chain, mitochondrial [OS=Homo sapiens]	no	Yes	no	-	-	-	3	3	11	biotin metabolic process, short-chain fatty acid catabolic process, hemolysis by symbiont of host erythrocytes,
	153	PDHB	P11177-3	Isoform 3 of Pyruvate dehydrogenase E1 component subunit beta, mitochondrial [OS=Homo sapiens]	no	Yes	no	-	-	-	2	2	17	glucose metabolic process, acetyl-CoA biosynthetic process from pyruvate, pyruvate metabolic process, tricarboxylic acid cycle, regulation of acetyl-CoA biosynthetic process from pyruvate, glyoxylate metabolic process, mitochondrial acetyl-CoA biosynthetic process from pyruvate,
	154	COQ6	Q9Y2Z9-3	Isoform 3 of Ubiquinone biosynthesis monooxygenase COQ6, mitochondrial [OS=Homo sapiens]	no	Yes	no	-	-	-	3	3	9	ubiquinone biosynthetic process, secondary metabolite biosynthetic process, oxidation-reduction process,
	155	ACOT9	Q9Y305-4	Isoform 4 of Acyl-coenzyme A thioesterase 9, mitochondrial [OS=Homo sapiens]	Yes	Yes	no	-	-	-	2	2	10	Mitochondrial Fatty Acid Beta-Oxidation
	156	GSR	P00390-5	Isoform 4 of Glutathione reductase, mitochondrial [OS=Homo sapiens]	no	Yes	Yes	-	-	-	3	3	15	response to reactive oxygen species, glutathione metabolic process, nucleobase-containing small molecule interconversion, cell redox homeostasis oxidation-reduction process, cellular oxidant detoxification,
	157	MAPK8	P45983-4	Isoform 4 of Mitogen-activated protein kinase 8 [OS=Homo sapiens]	no	Yes	no	-	-	-	4	4	18	protein phosphorylation, response to stress, JNK cascade, JUN phosphorylation, response to UV, positive regulation of gene expression, regulation of macroautophagy, peptidyl-serine phosphorylation, peptidyl-threonine phosphorylation, regulation of histone deacetylation, positive regulation of cyclase activity, negative regulation of protein binding, regulation of protein localization, Fc-epsilon …
	158	RHOT1	Q8IXI2-7	Isoform 7 of Mitochondrial Rho GTPase 1 [OS=Homo sapiens]	no	Yes	Yes	-	-	-	2	2	7	mitochondrion organization, small GTPase mediated signal transduction, cellular homeostasis, mitochondrion transport along microtubule, regulation of small GTPase mediated signal transduction, mitochondrial outer membrane permeabilization,
	159	GSR	P00390-2	Isoform Cytoplasmic of Glutathione reductase, mitochondrial [OS=Homo sapiens]	no	Yes	no	-	-	-	2	2	8	response to reactive oxygen species, glutathione metabolic process, nucleobase-containing small molecule interconversion, cell redox homeostasis oxidation-reduction process, cellular oxidant detoxification,
	160	SLC25A30	Q5SVS4	Kidney mitochondrial carrier protein 1 [OS=Homo sapiens]	no	Yes	no	-	-	-	2	2	10	translation, transport, mitochondrial transport,
	161	MTFMT	Q96DP5	Methionyl-tRNA formyltransferase, mitochondrial [OS=Homo sapiens]	no	Yes	no	-	-	-	2	2	9	translational initiation, biosynthetic process, conversion of methionyl-tRNA to N-formyl-methionyl-tRNA,
	162	MTCH2	Q9Y6C9	Mitochondrial carrier homolog 2 [OS=Homo sapiens]	Yes	Yes	no	-	-	-	2	2	11	apoptosis
	163	MIEF1	Q9NQG6	Mitochondrial dynamics protein MID51 [OS=Homo sapiens]	no	Yes	Yes	-	-	-	2	2	8	anatomical structure morphogenesis, mitochondrial translational elongation, mitochondrial translational termination,
	164	MTFR1L	Q9H019-1	Mitochondrial fission regulator 1-like [OS=Homo sapiens]	no	Yes	no	-	-	-	2	2	11	mitochondrial fission, aerobic respiration,
	165	TIMM22	Q9Y584	Mitochondrial import inner membrane translocase subunit TIM22 [OS=Homo sapiens]	no	Yes	Yes	-	-	-	3	3	21	protein targeting to mitochondrion, protein import into mitochondrial inner membrane,
	166	TIMM44	O43615	Mitochondrial import inner membrane translocase subunit TIM44 [OS=Homo sapiens]	Yes	Yes	Yes	-	-	-	12	12	13	Mitochondrial protein import
	167	TOMM6	Q96B49	Mitochondrial import receptor subunit TOM6 homolog [OS=Homo sapiens]	no	Yes	Yes	-	-	-	2	2	42	protein transport, macroautophagy,
	168	SLC25A19	Q9HC21	Mitochondrial thiamine pyrophosphate carrier [OS=Homo sapiens]	no	Yes	Yes	-	-	-	2	2	9	translation, transport, deoxynucleotide transport, transmembrane transport,
	169	SIRT4	Q9Y6E7	NAD-dependent protein lipoamidase sirtuin-4, mitochondrial [OS=Homo sapiens]	no	Yes	Yes	-	-	-	3	3	7	regulation of glutamine family amino acid metabolic process, chromatin silencing, protein ADP-ribosylation, glutamine metabolic process, cellular response to DNA damage stimulus, negative regulation of cardiac muscle cell apoptotic process, peptidyl-lysine deacetylation, negative regulation of fatty acid oxidation, negative regulation of insulin secretion, positive regulation of lipid biosyntheti…
	170	MTPAP	Q9NVV4	Poly(A) RNA polymerase, mitochondrial [OS=Homo sapiens]	Yes	Yes	no	-	-	-	7	7	8	mRNA processing, Transcription
	171	POLDIP2	Q9Y2S7	Polymerase delta-interacting protein 2 [OS=Homo sapiens]	Yes	Yes	no	-	-	-	3	3	14	positive regulation of mitotic cell cycle; negative regulation of macroautophagy; negative regulation of macroautophagy
	172	PET117	Q6UWS5	Protein PET117 homolog, mitochondrial [OS=Homo sapiens]	no	Yes	no	-	-	-	2	2	32	mitochondrial respiratory chain complex IV assembly,
	173	SCO1	O75880	Protein SCO1 homolog, mitochondrial [OS=Homo sapiens]	Yes	Yes	Yes	-	-	-	10	10	19	Electron Transport Chain; Copper homeostasis
	174	RDH13	Q8NBN7	Retinol dehydrogenase 13 [OS=Homo sapiens]	Yes	Yes	no	-	-	-	5	5	13	retinol metabolism
	175	SHMT2	P34897-1	Serine hydroxymethyltransferase, mitochondrial [OS=Homo sapiens]	no	Yes	Yes	-	-	-	5	5	8	glycine metabolic process, L-serine metabolic process, L-serine biosynthetic process, one-carbon metabolic process, positive regulation of cell proliferation, glycine biosynthetic process from serine, response to type I interferon, tetrahydrofolate interconversion, tetrahydrofolate metabolic process, folic acid metabolic process, protein tetramerization, protein homotetramerization, protein K63-l…
	176	SSBP1	Q04837	Single-stranded DNA-binding protein, mitochondrial [OS=Homo sapiens]	Yes	Yes	Yes	-	-	-	3	3	14	mitochondrial DNA replication
	177	SDHC	Q99643	Succinate dehydrogenase cytochrome b560 subunit, mitochondrial [OS=Homo sapiens]	no	Yes	Yes	-	-	-	2	2	19	tricarboxylic acid cycle, mitochondrial electron transport, succinate to ubiquinone, erobic respiration, oxidation-reduction process,

## Sheet: Hs578t
								HaloLink® Resin; pmOGT-HaloTag vs pHaloTag treatment			IP RL2; mOGT-HaloTag vs pCDII-mOGT-HaloTag and pHaloTag treatment
					Co-existence
Cell Line	Number	Gene	Accession Number	Protein name	MCF-7	MDA-MB-231	Hs 578t	Peptides	Unique peptides	Coverage (%)	Peptides	Unique peptides	Coverage (%)	Processes/Function
Hs578t
	1	MRPS16	Q9Y3D3	28S ribosomal protein S16, mitochondrial [OS=Homo sapiens]	no	no	Yes	14	3	16	5	5	26	translation, mitochondrial translation, mitochondrial translational elongation, mitochondrial translational termination,
	2	MRPS35	P82673-1	28S ribosomal protein S35, mitochondrial [OS=Homo sapiens]	no	no	Yes	26	7	16	5	5	10	DNA damage response, detection of DNA damage, mitochondrial translational elongation,mitochondrial translational termination,
	3	MRPS5	P82675	28S ribosomal protein S5, mitochondrial [OS=Homo sapiens]	no	no	Yes	15	5	14	3	3	14	translation, mitochondrial translational elongation, mitochondrial translational termination,
	4	MRPL42	Q9Y6G3	39S ribosomal protein L42, mitochondrial [OS=Homo sapiens]	no	Yes	Yes	5	3	12	2	2	15	translation, mitochondrial translational elongation, mitochondrial translational termination,
	5	OXSM	Q9NWU1-1	3-oxoacyl-[acyl-carrier-protein] synthase, mitochondrial [OS=Homo sapiens]	no	Yes	Yes	21	11	26	2	2	5	fatty acid biosynthetic process, acyl-CoA metabolic process, metabolic process, short-chain fatty acid biosynthetic process, medium-chain fatty acid biosynthetic process,
	6	UQCRH	P07919	Cytochrome b-c1 complex subunit 6, mitochondrial [OS=Homo sapiens]	no	no	Yes	8	3	65	3	3	37	oxidative phosphorylation,mitochondrial electron transport, ubiquinol to cytochrome c, aerobic respiration, oxidation-reduction process, hydrogen ion transmembrane transport,
	7	COX6A2	Q02221	Cytochrome c oxidase subunit 6A2, mitochondrial [OS=Homo sapiens]	no	no	Yes	7	2	27	2	2	27	generation of precursor metabolites and energy, mitochondrial electron transport, cytochrome c to oxygen, aerobic respiration, regulation of catalytic activity, hydrogen ion transmembrane transport,
	8	COX8A	P10176	cytochrome c oxidase subunit 8A, mitochondrial [OS=Homo sapiens]	no	no	Yes	4	2	51	5	5	51	generation of precursor metabolites and energy, mitochondrial electron transport, cytochrome c to oxygen, hydrogen ion transmembrane transport,
	9	CYP11B2	P19099	Cytochrome P450 11B2, mitochondrial [OS=Homo sapiens]	no	no	Yes	14	8	11	8	7	8	regulation of blood volume by renal aldosterone, renal water homeostasis, C21-steroid hormone biosynthetic process, mineralocorticoid biosynthetic process, cholesterol metabolic process, sterol metabolic process, aldosterone biosynthetic process, cellular response to hormone stimulus, cortisol biosynthetic process, cellular response to potassium ion, secondary metabolite biosynthetic process, pot…
	10	DGUOK	Q16854	Deoxyguanosine kinase, mitochondrial [OS=Homo sapiens]	no	no	Yes	10	1	9	2	2	9	protein phosphorylation, guanosine metabolic process deoxyribonucleoside monophosphate biosynthetic process, nucleotide biosynthetic process, negative regulation of neuron projection development, purine-containing compound salvage, dGTP metabolic process, purine deoxyribonucleoside metabolic process,
	11	ECI1	P42126	Enoyl-CoA delta isomerase 1, mitochondrial [OS=Homo sapiens]	Yes	no	Yes	4	5	13	3	3	12	Fatty acid beta-oxidation
	12	GLUD1	P00367	Glutamate dehydrogenase 1, mitochondrial [OS=Homo sapiens]	no	no	Yes	22	9	12	6	6	7	cellular amino acid metabolic process, glutamate biosynthetic process, glutamate catabolic process, glutamine metabolic process, cellular amino acid biosynthetic process, substantia nigra development, positive regulation of insulin secretion, oxidation-reduction process, tricarboxylic acid metabolic process,
	13	TDH	Q8IZJ6	Inactive L-threonine 3-dehydrogenase, mitochondrial [OS=Homo sapiens]	no	no	Yes	15	7	14	4	4	18	L-threonine catabolic process to glycine,
	14	ISCU	Q9H1K1	Iron-sulfur cluster assembly enzyme ISCU, mitochondrial [OS=Homo sapiens]	no	Yes	Yes	3	1	16	2	2	17	cellular iron ion homeostasis, nitrogen fixation, iron-sulfur cluster assembly, small molecule metabolic process, [2Fe-2S] cluster assembly, protein maturation by iron-sulfur cluster transfer,
	15	OXSM	Q9NWU1-2	Isoform 2 of 3-oxoacyl-[acyl-carrier-protein] synthase, mitochondrial [OS=Homo sapiens]	no	no	Yes	12	2	18	2	2	8	fatty acid biosynthetic process, acyl-CoA metabolic process, metabolic process, short-chain fatty acid biosynthetic process, medium-chain fatty acid biosynthetic process,
	16	ATP5MC2	Q06055-2	Isoform 2 of ATP synthase F(0) complex subunit C2, mitochondrial [OS=Homo sapiens]	no	no	Yes	5	2	16	2	1	31	ATP biosynthetic process, ATP synthesis coupled proton transport, ATP hydrolysis coupled proton transport, mitochondrial ATP synthesis coupled proton transport,
	17	TMEM126B	Q8IUX1-2	Isoform 2 of Complex I assembly factor TMEM126B, mitochondrial [OS=Homo sapiens]	no	no	Yes	20	10	46	4	4	16	mitochondrial respiratory chain complex I assembly,
	18	DMGDH	Q9UI17-2	Isoform 2 of Dimethylglycine dehydrogenase, mitochondrial [OS=Homo sapiens]	no	no	Yes	16	1	5	4	2	15	glycine metabolic process, amino-acid betaine catabolic process, choline metabolic process, choline catabolic process, oxidation-reduction process,
	19	IDH2	P48735-2	Isoform 2 of Isocitrate dehydrogenase [NADP], mitochondrial [OS=Homo sapiens]	no	no	Yes	8	2	7	2	2	7	carbohydrate metabolic process, glyoxylate cycle, tricarboxylic acid cycle, isocitrate metabolic process, 2-oxoglutarate metabolic process,
	20	MRS2	Q9HD23-2	Isoform 2 of Magnesium transporter MRS2 homolog, mitochondrial [OS=Homo sapiens]	no	no	Yes	19	3	9	2	2	12	mitochondrial magnesium ion transport, transmembrane transport, mitochondrial magnesium ion transmembrane transport,
	21	NDUFS2	O75306-2	Isoform 2 of NADH dehydrogenase [ubiquinone] iron-sulfur protein 2, mitochondrial [OS=Homo sapiens]	no	Yes	Yes	17	1	7	2	2	7	mitochondrial electron transport, NADH to ubiquinone, response to oxidative stress, mitochondrial respiratory chain complex I assembly,
	22	OAT	P04181-2	Isoform 2 of Ornithine aminotransferase, mitochondrial [OS=Homo sapiens]	no	no	Yes	7	3	19	3	3	15	visual perception, cellular amino acid biosynthetic process, arginine catabolic process to proline via ornithine, arginine catabolic process to glutamate, protein hexamerization, L-proline biosynthetic process,
	23	SLIRP	Q9GZT3-2	Isoform 2 of SRA stem-loop-interacting RNA-binding protein, mitochondrial [OS=Homo sapiens]	no	Yes	Yes	4	1	30	2	2	30	negative regulation of mitochondrial RNA catabolic process, transcription, DNA-templated, regulation of transcription, DNA-templated, spermatid development, single fertilization, sperm motility, mitochondrion morphogenesis,
	24	HADHB	P55084-2	Isoform 2 of Trifunctional enzyme subunit beta, mitochondrial [OS=Homo sapiens]	no	no	Yes	14	7	18	3	3	5	atty acid beta-oxidation, metabolic process, cardiolipin acyl-chain remodeling,
	25	GTPBP3	Q969Y2-2	Isoform 2 of tRNA modification GTPase GTPBP3, mitochondrial [OS=Homo sapiens]	no	no	Yes	3	1	6	2	2	10	tRNA wobble uridine modification, tRNA methylation,
	26	LONP1	P36776-3	Isoform 3 of Lon protease homolog, mitochondrial [OS=Homo sapiens]	no	no	Yes	12	1	5	2	2	3	mitochondrial genome maintenance, response to hypoxia, misfolded or incompletely synthesized protein catabolic process, mitochondrion organization, aging, response to hormone, response to aluminum ion, protein catabolic process, mitochondrial DNA metabolic process, cellular response to oxidative stress, chaperone-mediated protein complex assembly, protein homooligomerization, proteolysis involved…
	27	METTL17	Q9H7H0-3	Isoform 3 of Methyltransferase-like protein 17, mitochondrial [OS=Homo sapiens]	no	Yes	Yes	26	2	4	2	2	5	translation, respiratory chain complex IV assembly, aerobic respiration, methylation,
	28	MTRF1L	Q9UGC7-3	Isoform 3 of Peptide chain release factor 1-like, mitochondrial [OS=Homo sapiens]	no	no	Yes	16	7	29	3	3	13	mitochondrial translational termination,
	29	OPA1	O60313-10	Isoform 4 of Dynamin-like 120 kDa protein, mitochondrial [OS=Homo sapiens]	no	no	Yes	13	1	3	2	2	4	mitochondrial genome maintenance, mitochondrial fission, dynamin polymerization involved in mitochondrial fission, apoptotic process, mitochondrion organization, inner mitochondrial membrane organization, aging, visual perception, mitochondrial fusion, positive regulation of mitochondrial fusion, positive regulation of neuron maturation, axonal transport of mitochondrion, negative regulation of r…
	30	MAVS	Q7Z434-4	Isoform 4 of Mitochondrial antiviral-signaling protein [OS=Homo sapiens]	no	no	Yes	13	2	13	2	2	17	positive regulation of protein phosphorylation, activation of innate immune response, positive regulation of defense response to virus by host, signal transduction, negative regulation of type I interferon production, positive regulation of interferon-alpha production, positive regulation of interferon-beta production, positive regulation of interleukin-8 production, positive regulation of tumor …
	31	MTO1	Q9Y2Z2-5	Isoform 6 of Protein MTO1 homolog, mitochondrial [OS=Homo sapiens]	no	no	Yes	6	6	15	2	2	6	tRNA processing, tRNA methylation, oxidation-reduction process, mitochondrial tRNA wobble uridine modification,
	32	TIMM21	Q9BVV7	Mitochondrial import inner membrane translocase subunit TIM21 [OS=Homo sapiens]	no	no	Yes	5	1	8	2	2	8	protein import into mitochondrial matrix, mitochondrial respiratory chain complex I assembly, mitochondrial respiratory chain complex IV assembly,
	33	TIMM8A	O60220	Mitochondrial import inner membrane translocase subunit Tim8 A [OS=Homo sapiens]	no	Yes	Yes	34	1	32	4	4	47	nervous system development, chaperone-mediated protein transport,
	34	NFU1	Q9UMS0	NFU1 iron-sulfur cluster scaffold homolog, mitochondrial [OS=Homo sapiens]	no	no	Yes	18	4	18	4	4	25	iron-sulfur cluster assembly,
	35	OTC	P00480	Ornithine carbamoyltransferase, mitochondrial [OS=Homo sapiens]	no	no	Yes	11	8	12	2	2	7	urea cycle, liver development, ornithine catabolic process, midgut development, response to zinc ion, citrulline biosynthetic process, esponse to insulin, arginine biosynthetic process via ornithine, response to drug, anion homeostasis, protein homotrimerization, response to biotin, ammonia homeostasis,
	36	PYCR1	P32322	Pyrroline-5-carboxylate reductase 1, mitochondrial [OS=Homo sapiens]	no	no	Yes	16	3	9	4	4	16	proline biosynthetic process, cellular amino acid biosynthetic process, cellular response to oxidative stress, regulation of mitochondrial membrane potential, oxidation-reduction process, L-proline biosynthetic process, negative regulation of hydrogen peroxide-induced cell death,
	37	MRPL57	Q9BQC6	Ribosomal protein 63, mitochondrial [OS=Homo sapiens]	no	no	Yes	6	1	9	2	2	15	translation, mitochondrial translation,
	38	PINK1	Q9BXM7-1	Serine/threonine-protein kinase PINK1, mitochondrial [OS=Homo sapiens]	no	no	Yes	13	5	5	3	3	6	mitophagy, positive regulation of protein phosphorylation, regulation of oxidative phosphorylation, protein phosphorylation, ubiquitin-dependent protein catabolic process, response to stress, response to oxidative stress, mitochondrion organization, regulation of hydrogen peroxide metabolic process, negative regulation of gene expression, regulation of mitochondrion organization, positive regulat…
	39	SDHAF1	A6NFY7	succinate dehydrogenase assembly factor 1, mitochondrial [OS=Homo sapiens]	no	Yes	Yes	7	1	30	4	4	31	mitochondrial respiratory chain complex II assembly,
	40	MTERF2	Q49AM1	Transcription termination factor 2, mitochondrial [OS=Homo sapiens]	no	no	Yes	8	6	12	3	3	5	transcription, DNA-templated, regulation of transcription, DNA-templated, termination of mitochondrial transcription,
	41	SLC25A1	P53007	Tricarboxylate transport protein, mitochondrial [OS=Homo sapiens]	no	no	Yes	15	12	18	3	3	11	gluconeogenesis, translation, transport, citrate transport, long-chain fatty-acyl-CoA biosynthetic process, tricarboxylic acid transmembrane transport,
	42	PDK1	Q15118	[Pyruvate dehydrogenase (Acetyl-transferring)] kinase isozyme 1, mitochondrial [OS=Homo sapiens]	Yes	Yes	Yes	13	6	13	-		-	Carbohydrate metabolism, Glucose metabolism
	43	PDK3	Q15120-1	[Pyruvate dehydrogenase (acetyl-transferring)] kinase isozyme 3, mitochondrial [OS=Homo sapiens]	no	no	Yes	15	13	18	-		-	glucose metabolic process, regulation of acetyl-CoA biosynthetic process from pyruvate, regulation of glucose metabolic process, peptidyl-serine phosphorylation, peroxisome proliferator activated receptor signaling pathway, cellular response to glucose stimulus, cellular response to fatty acid, hypoxia-inducible factor-1alpha signaling pathway, regulation of reactive oxygen species metabolic proc…
	44	TNKS1BP1	Q9C0C2	182 kDa tankyrase-1-binding protein [OS=Homo sapiens]	no	no	Yes	55	55	13	-		-	nuclear-transcribed mRNA poly(A) tail shortening, DNA damage response, signal transduction by p53 class mediator resulting in cell cycle arrest, telomere maintenance via telomerase, cell-cell adhesion,
	45	MRPS10	P82664	28S ribosomal protein S10, mitochondrial [OS=Homo sapiens]	no	no	Yes	4	4	29	-		-	mitochondrial translational elongation, mitochondrial translational termination,
	46	MRPS11	P82912-1	28S ribosomal protein S11, mitochondrial [OS=Homo sapiens]	no	no	Yes	6	5	21	-		-	ribosomal small subunit assembly, maturation of SSU-rRNA from tricistronic rRNA transcript (SSU-rRNA, 5.8S rRNA, LSU-rRNA), translation, mitochondrial translation, DNA damage response, detection of DNA damage, mitochondrial translational elongation, mitochondrial translational termination,
	47	MRPS14	O60783	28S ribosomal protein S14, mitochondrial [OS=Homo sapiens]	no	no	Yes	5	3	20	-		-	translation, mitochondrial translational elongation, mitochondrial translational termination,
	48	MRPS15	P82914	28S ribosomal protein S15, mitochondrial [OS=Homo sapiens]	no	no	Yes	4	1	9	-		-	translation, mitochondrial translation, mitochondrial translational elongation, mitochondrial translational termination,
	49	MRPS17	Q9Y2R5	28S ribosomal protein S17, mitochondrial [OS=Homo sapiens]	no	Yes	Yes	10	1	12	-		-	translation, mitochondrial translation, mitochondrial translational elongation, mitochondrial translational termination,
	50	MRPS18C	Q9Y3D5	28S ribosomal protein S18c, mitochondrial [OS=Homo sapiens]	no	no	Yes	6	4	23	-		-	translation, mitochondrial translation, mitochondrial translational elongation, mitochondrial translational termination,
	51	MRPS23	Q9Y3D9	28S ribosomal protein S23, mitochondrial [OS=Homo sapiens]	no	no	Yes	8	2	11	-		-	translation, mitochondrial translational elongation, mitochondrial translational termination,
	52	MRPS25	P82663	28S ribosomal protein S25, mitochondrial [OS=Homo sapiens]	Yes	no	Yes	4	4	17	-		-	Translation
	53	MRPS27	Q92552	28S ribosomal protein S27, mitochondrial [OS=Homo sapiens]	no	no	Yes	11	7	18	-		-	mitochondrial translational elongation, mitochondrial translational termination,
	54	MRPS6	P82932	28S ribosomal protein S6, mitochondrial [OS=Homo sapiens]	no	Yes	Yes	9	2	27	-		-	translation, mitochondrial translation, mitochondrial translational elongation, mitochondrial translational termination,
	55	MRPS7	Q9Y2R9	28S ribosomal protein S7, mitochondrial [OS=Homo sapiens]	no	no	Yes	12	8	22	-		-	ribosomal small subunit assembly, translation, mitochondrial translation, mitochondrial translational elongation, mitochondrial translational termination,
	56	GCAT	O75600-1	2-amino-3-ketobutyrate coenzyme A ligase, mitochondrial [OS=Homo sapiens]	no	no	Yes	12	15	16	-		-	cellular amino acid metabolic process, threonine catabolic process, biosynthetic process, L-threonine catabolic process to glycine,
	57	COQ5	Q5HYK3-1	2-methoxy-6-polyprenyl-1,4-benzoquinol methylase, mitochondrial [OS=Homo sapiens]	no	no	Yes	13	4	12	-		-	ubiquinone biosynthetic process, methylation,
	58	MRPL1	Q9BYD6	39S ribosomal protein L1, mitochondrial [OS=Homo sapiens]	no	no	Yes	13	7	13	-		-	maturation of LSU-rRNA, translation, mitochondrial translational elongation, mitochondrial translational termination,
	59	MRPL10	Q7Z7H8	39S ribosomal protein L10, mitochondrial [OS=Homo sapiens]	no	no	Yes	6	5	23	-		-	translation, mitochondrial translation, ribosome biogenesis, mitochondrial translational elongation, mitochondrial translational termination,
	60	MRPL11	Q9Y3B7-1	39S ribosomal protein L11, mitochondrial [OS=Homo sapiens]	no	no	Yes	10	3	32	-		-	ribosomal large subunit assembly, translation, mitochondrial translational elongation, mitochondrial translational termination,
	61	MRPL13	Q9BYD1	39S ribosomal protein L13, mitochondrial [OS=Homo sapiens]	no	Yes	Yes	4	1	19	-		-	translation, mitochondrial translational elongation, mitochondrial translational termination,
	62	MRPL16	Q9NX20	39S ribosomal protein L16, mitochondrial [OS=Homo sapiens]	Yes	no	Yes	18	9	37	-		-	Mitochondrial translation initiation; Mitochondrial translation elongation; Mitochondrial translation termination
	63	MRPL18	Q9H0U6	39S ribosomal protein L18, mitochondrial [OS=Homo sapiens]	no	no	Yes	15	5	25	-		-	translation, rRNA import into mitochondrion, mitochondrial translational elongation, mitochondrial translational termination,
	64	MRPL2	Q5T653	39S ribosomal protein L2, mitochondrial [OS=Homo sapiens]	no	no	Yes	12	6	19	-		-	cytoplasmic translation, translation, mitochondrial translation, mitochondrial translational elongation, mitochondrial translational termination,
	65	MRPL20	Q9BYC9	39S ribosomal protein L20, mitochondrial [OS=Homo sapiens]	Yes	Yes	Yes	23	2	14	-		-	Mitochondrial translation initiation; Mitochondrial translation elongation; Mitochondrial translation termination
	66	MRPL21	Q7Z2W9	39S ribosomal protein L21, mitochondrial [OS=Homo sapiens]	no	no	Yes	21	3	21	-		-	translation, mitochondrial translational elongation, mitochondrial translational termination,
	67	MRPL22	Q9NWU5	39S ribosomal protein L22, mitochondrial [OS=Homo sapiens]	no	Yes	Yes	16	1	13	-		-	translation, mitochondrial translational elongation, mitochondrial translational termination,
	68	MRPL23	Q16540	39S ribosomal protein L23, mitochondrial [OS=Homo sapiens]	no	no	Yes	13	12	35	-		-	translation, mitochondrial translation, mitochondrial translational elongation, mitochondrial translational termination,
	69	MRPL23	Q16540	39S ribosomal protein L23, mitochondrial [OS=Homo sapiens]	no	no	Yes	13	12	35	-		-	translation, mitochondrial translation, mitochondrial translational elongation, mitochondrial translational termination,
	70	MRPL24	Q96A35	39S ribosomal protein L24, mitochondrial [OS=Homo sapiens]	Yes	Yes	Yes	9	9	33	-		-	Mitochondrial translation initiation; Mitochondrial translation elongation; Mitochondrial translation termination
	71	MRPL28	Q13084	39S ribosomal protein L28, mitochondrial [OS=Homo sapiens]	Yes	Yes	Yes	14	14	49	-		-	Mitochondrial translation initiation; Mitochondrial translation elongation; Mitochondrial translation termination
	72	MRPL3	P09001	39S ribosomal protein L3, mitochondrial [OS=Homo sapiens]	no	no	Yes	14	9	14	-		-	~translation, mitochondrial translational elongation, mitochondrial translational termination,
	73	MRPL30	Q8TCC3	39S ribosomal protein L30, mitochondrial [OS=Homo sapiens]	no	no	Yes	9	7	21	-		-	mitochondrial translational elongation, mitochondrial translational termination,
	74	MRPL32	Q9BYC8	39S ribosomal protein L32, mitochondrial [OS=Homo sapiens]	no	no	Yes	21	8	19	-		-	translation, mitochondrial translational elongation, mitochondrial translational termination,
	75	MRPL35	Q9NZE8	39S ribosomal protein L35, mitochondrial [OS=Homo sapiens]	no	no	Yes	18	3	15	-		-	translation, mitochondrial translational elongation, mitochondrial translational termination,
	76	MRPL36	Q9P0J6	39S ribosomal protein L36, mitochondrial [OS=Homo sapiens]	no	no	Yes	13	11	23	-		-	translation, ribosome biogenesis, mitochondrial translational elongation, mitochondrial translational termination,
	77	MRPL37	Q9BZE1	39S ribosomal protein L37, mitochondrial [OS=Homo sapiens]	Yes	no	Yes	16	5	9	-		-	Mitochondrial translation initiation; Mitochondrial translation elongation; Mitochondrial translation termination
	78	MRPL38	Q96DV4	39S ribosomal protein L38, mitochondrial [OS=Homo sapiens]	Yes	no	Yes	17	1	4	-		-	Mitochondrial translation initiation; Mitochondrial translation elongation; Mitochondrial translation termination
	79	MRPL41	Q8IXM3	39S ribosomal protein L41, mitochondrial [OS=Homo sapiens]	no	no	Yes	8	1	9	-		-	translation, apoptotic process, cell cycle, mitochondrial translational elongation, mitochondrial translational termination,
	80	MRPL43	Q8N983	39S ribosomal protein L43, mitochondrial [OS=Homo sapiens]	no	no	Yes	7	3	15	-		-	translation, mitochondrial translational elongation, mitochondrial translational termination,
	81	MRPL44	Q9H9J2	39S ribosomal protein L44, mitochondrial [OS=Homo sapiens]	no	no	Yes	12	12	17	-		-	NA processing, production of siRNA involved in RNA interference, primary miRNA processing, pre-miRNA processing, mitochondrial translational elongation, mitochondrial translational termination, RNA phosphodiester bond hydrolysis, endonucleolytic,
	82	MRPL46	Q9H2W6	39S ribosomal protein L46, mitochondrial [OS=Homo sapiens]	Yes	no	Yes	6	3	19	-		-	Mitochondrial translation initiation; Mitochondrial translation elongation; Mitochondrial translation termination
	83	MRPL50	Q8N5N7	39S ribosomal protein L50, mitochondrial [OS=Homo sapiens]	no	no	Yes	5	5	20	-		-	mitochondrial translational elongation, mitochondrial translational termination,
	84	MRPL53	Q96EL3	39S ribosomal protein L53, mitochondrial [OS=Homo sapiens]	no	no	Yes	9	1	13	-		-	mitochondrial translational elongation, mitochondrial translational termination,
	85	ACAA2	P42765	3-ketoacyl-CoA thiolase, mitochondrial [OS=Homo sapiens]	no	no	Yes	14	15	21	-		-	fatty acid beta-oxidation, cholesterol biosynthetic process, metabolic process, cellular response to hypoxia, negative regulation of mitochondrial outer membrane permeabilization involved in apoptotic signaling pathway, negative regulation of mitochondrial membrane permeability involved in apoptotic process,
	86	ABAT	P80404	4-aminobutyrate aminotransferase, mitochondrial [OS=Homo sapiens]	no	no	Yes	13	9	12	-		-	response to hypoxia, aging, copulation, locomotory behavior, gamma-aminobutyric acid metabolic process, gamma-aminobutyric acid biosynthetic process, gamma-aminobutyric acid catabolic process, response to iron ion, negative regulation of gamma-aminobutyric acid secretion, cerebellum development, positive regulation of heat generation, positive regulation of insulin secretion, negative regulation …
	87	NT5M	Q9NPB1	5'(3')-deoxyribonucleotidase, mitochondrial [OS=Homo sapiens]	no	no	Yes	11	1	9	-		-	DNA replication, pyrimidine deoxyribonucleotide catabolic process, deoxyribonucleotide catabolic process, dephosphorylation, dUMP catabolic process, pyrimidine nucleoside catabolic process,
	88	HTR1D	P28221	5-hydroxytryptamine receptor 1D [OS=Homo sapiens]	no	no	Yes	21	21	26	-		-	G-protein coupled receptor signaling pathway, coupled to cyclic nucleotide second messenger, adenylate cyclase-inhibiting G-protein coupled receptor signaling pathway, phospholipase C-activating G-protein coupled receptor signaling pathway, serotonin receptor signaling pathway, chemical synaptic transmission, response to toxic substance, intestine smooth muscle contraction, regulation of locomoti…
	89	ACSS1	Q9NUB1	Acetyl-coenzyme A synthetase 2-like, mitochondrial [OS=Homo sapiens]	no	no	Yes	7	9	8	-		-	ethanol oxidation, acetyl-CoA biosynthetic process, metabolic process, acetate biosynthetic process, acetyl-CoA biosynthetic process from acetate, propionate biosynthetic process,
	90	ATF7IP2	Q5U623	Activating transcription factor 7-interacting protein 2 [OS=Homo sapiens]	no	no	Yes	24	21	19	-		-	transcription, DNA-templated, regulation of transcription, DNA-templated,
	91	NDUFAB1	O14561	Acyl carrier protein, mitochondrial [OS=Homo sapiens]	no	no	Yes	15	4	23	-		-	mitochondrial electron transport, NADH to ubiquinone, fatty acid biosynthetic process, protein lipoylation, mitochondrial respiratory chain complex I assembly, glyoxylate metabolic process,
	92	ACAD9	Q9H845	Acyl-CoA dehydrogenase family member 9, mitochondrial [OS=Homo sapiens]	Yes	no	Yes	29	9	13	-		-	mitochondrial respiratory chain complex I assembly; long-chain fatty acid metabolic process
	93	ACSM2A	Q08AH3	Acyl-coenzyme A synthetase ACSM2A, mitochondrial [OS=Homo sapiens]	no	no	Yes	19	11	17	-		-	fatty acid metabolic process, fatty acid biosynthetic process, metabolic process, medium-chain fatty-acyl-CoA metabolic process, glucose homeostasis, triglyceride homeostasis,
	94	ACSM2B	Q68CK6	Acyl-coenzyme A synthetase ACSM2B, mitochondrial [OS=Homo sapiens]	no	no	Yes	23	21	25	-		-	fatty acid metabolic process, fatty acid biosynthetic process, acyl-CoA metabolic process, xenobiotic metabolic process, metabolic process,
	95	ACSM3	Q53FZ2-1	Acyl-coenzyme A synthetase ACSM3, mitochondrial [OS=Homo sapiens]	no	no	Yes	20	5	9	-		-	fatty acid biosynthetic process, acyl-CoA metabolic process, metabolic process, regulation of blood pressure, cholesterol homeostasis,
	96	ACSM4	P0C7M7	Acyl-coenzyme A synthetase ACSM4, mitochondrial [OS=Homo sapiens]	no	no	Yes	17	7	9	-		-	fatty acid metabolic process, fatty acid biosynthetic process, acyl-CoA metabolic process,
	97	ACOT9	Q9Y305-1	Acyl-coenzyme A thioesterase 9, mitochondrial [OS=Homo sapiens]	no	no	Yes	10	9	12	-		-	acyl-CoA metabolic process, long-chain fatty-acyl-CoA biosynthetic process,
	98	FAHD1	Q6P587-1	Acylpyruvase FAHD1, mitochondrial [OS=Homo sapiens]	no	no	Yes	7	3	24	-		-	metabolic process,
	99	AK2	P54819	Adenylate kinase 2, mitochondrial [OS=Homo sapiens]	Yes	Yes	Yes	28	1	12	-		-	ATP, AMP metabolic, ADP biosynthesis
	100	AK4	P27144	Adenylate kinase 4, mitochondrial [OS=Homo sapiens]	Yes	no	Yes	32	2	9	-		-	Metabolic pathways; Purine metabolism; Thiamine metabolism
	101	NUDT9	Q9BW91-1	ADP-ribose pyrophosphatase, mitochondrial [OS=Homo sapiens]	no	no	Yes	8	2	12	-		-	cation transport, nucleobase-containing small molecule catabolic process, ADP catabolic process, IDP catabolic process,
	102	AGMAT	Q9BSE5	Agmatinase, mitochondrial [OS=Homo sapiens]	no	no	Yes	15	5	15	-		-	spermidine biosynthetic process, putrescine biosynthetic process from arginine, agmatine biosynthetic process,
	103	AARS2	Q5JTZ9	alanine--tRNA ligase, mitochondrial [OS=Homo sapiens]	no	no	Yes	14	19	13	-		-	tRNA modification, mitochondrial respiratory chain complex assembly, mitochondrial alanyl-tRNA aminoacylation,
	104	ALDH2	P05091	Aldehyde dehydrogenase, mitochondrial [OS=Homo sapiens]	no	no	Yes	15	3	12	-		-	carbohydrate metabolic process, alcohol metabolic process, ethanol catabolic process, ethanol oxidation,
	105	ST6GALNAC2	Q9UJ37	Alpha-N-acetylgalactosaminide alpha-2,6-sialyltransferase 2 [OS=Homo sapiens]	no	no	Yes	7	6	11	-		-	ganglioside biosynthetic process, protein glycosylation, oligosaccharide metabolic process, O-glycan processing, protein N-linked glycosylation via asparagine, sialylation,
	106	AIFM1	O95831-1	Apoptosis-inducing factor 1, mitochondrial [OS=Homo sapiens]	no	no	Yes	15	2	7	-		-	response to ischemia, DNA catabolic process, apoptotic process, activation of cysteine-type endopeptidase activity involved in apoptotic process, response to toxic substance, neuron differentiation, chromosome condensation, mitochondrial respiratory chain complex I assembly, positive regulation of apoptotic process, positive regulation of neuron apoptotic process, cell redox homeostasis, neuron a…
	107	ARG2	P78540	arginase-2, mitochondrial [OS=Homo sapiens]	no	no	Yes	9	4	12	-		-	urea cycle, ureteric bud development, arginine metabolic process, nitric oxide biosynthetic process, striated muscle contraction,
	108	NDUFAF5	Q5TEU4	Arginine-hydroxylase NDUFAF5, mitochondrial [OS=Homo sapiens]	Yes	no	Yes	9	8	12	-		-	mitochondrial respiratory chain complex I assembly
	109	GOT2	P00505	Aspartate aminotransferase, mitochondrial [OS=Homo sapiens]	no	no	Yes	22	3	16	-		-	gluconeogenesis, 2-oxoglutarate metabolic process, oxaloacetate metabolic process, cellular amino acid metabolic process, aspartate metabolic process, aspartate biosynthetic process, aspartate catabolic process, glutamate metabolic process, cellular amino acid biosynthetic process, biosynthetic process, fatty acid transport, 4-hydroxyproline catabolic process, glutamate catabolic process to aspar…
	110	DARS2	Q6PI48	Aspartate--tRNA ligase, mitochondrial [OS=Homo sapiens]	no	no	Yes	22	11	8	-		-	tRNA aminoacylation for protein translation, tRNA aminoacylation, mitochondrial asparaginyl-tRNA aminoacylation,
	111	ATP5PB	P24539	ATP synthase F(0) complex subunit B1, mitochondrial [OS=Homo sapiens]	no	no	Yes	11	3	13	-		-	ATP biosynthetic process, ATP synthesis coupled proton transport, substantia nigra development, mitochondrial ATP synthesis coupled proton transport,
	112	ATP5MC1	P05496	ATP synthase F(0) complex subunit C1, mitochondrial [OS=Homo sapiens]	no	Yes	Yes	11	1	14	-		-	ATP biosynthetic process, ATP synthesis coupled proton transport,GO:0015991~ATP hydrolysis coupled proton transport,GO:0042776~mitochondrial ATP synthesis coupled proton transport,
	113	ATP5MC3	P48201	ATP synthase F(0) complex subunit C3, mitochondrial [OS=Homo sapiens]	no	no	Yes	7	1	13	-		-	ATP biosynthetic process, ATP synthesis coupled proton transport, ATP hydrolysis coupled proton transport, mitochondrial ATP synthesis coupled proton transport,
	114	ATPAF1	Q5TC12-1	ATP synthase mitochondrial F1 complex assembly factor 1 [OS=Homo sapiens]	no	Yes	Yes	11	1	10	-		-	protein complex assembly, mitochondrial proton-transporting ATP synthase complex assembly,
	115	ATPAF2	Q8N5M1	ATP synthase mitochondrial F1 complex assembly factor 2 [OS=Homo sapiens]	Yes	no	Yes	16	10	18	-		-	proton-transporting ATP synthase complex assembly
	116	ATP5F1B	P06576	ATP synthase subunit beta, mitochondrial [OS=Homo sapiens]	no	no	Yes	14	14	15	-		-	angiogenesis, osteoblast differentiation, generation of precursor metabolites and energy, lipid metabolic process, ATP biosynthetic process, negative regulation of cell adhesion involved in substrate-bound cell migration, mitochondrion organization, ATP synthesis coupled proton transport, ATP hydrolysis coupled proton transport, proton transport, mitochondrial ATP synthesis coupled proton transpo…
	117	ATP5F1EP2	Q5VTU8	ATP synthase subunit epsilon-like protein, mitochondrial [OS=Homo sapiens]	no	no	Yes	9	1	35	-		-	ATP synthesis coupled proton transport,
	118	ATP5MGL	Q7Z4Y8	ATP synthase subunit g 2, mitochondrial [OS=Homo sapiens]	no	no	Yes	7	1	26	-		-	ATP synthesis coupled proton transport,
	119	ATP5F1C	P36542-1	ATP synthase subunit gamma, mitochondrial [OS=Homo sapiens]	no	no	Yes	21	3	9	-		-	GO:0006119~oxidative phosphorylation,GO:0006754~ATP biosynthetic process,GO:0015986~ATP synthesis coupled proton transport,GO:0042776~mitochondrial ATP synthesis coupled proton transport,
	120	ATP5PO	P48047	ATP synthase subunit O, mitochondrial [OS=Homo sapiens]	no	no	Yes	53	3	12	-		-	ATP biosynthetic process, ATP synthesis coupled proton transport, proton transport, mitochondrial ATP synthesis coupled proton transport,
	121	DMAC2L	Q99766-1	ATP synthase subunit s, mitochondrial [OS=Homo sapiens]	no	no	Yes	18	6	22	-		-	ATP biosynthetic process, proton transport, mitochondrial ATP synthesis coupled proton transport,
	122	ABCB6	Q9NP58	ATP-binding cassette sub-family B member 6, mitochondrial [OS=Homo sapiens]	no	no	Yes	21	13	9	-		-	porphyrin-containing compound biosynthetic process, transport, cellular iron ion homeostasis, brain development, heme transport, skin development, transmembrane transport,
	123	CLPP	Q16740	ATP-dependent Clp protease proteolytic subunit, mitochondrial [OS=Homo sapiens]	no	no	Yes	16	2	12	-		-	protein homooligomerization, proteolysis involved in cellular protein catabolic process,
	124	DDX50	Q9BQ39	ATP-dependent RNA helicase DDX50 [OS=Homo sapiens]	no	no	Yes	16	16	6	-		-	RNA secondary structure unwinding,
	125	SUPV3L1	Q8IYB8	ATP-dependent RNA helicase SUPV3L1, mitochondrial [OS=Homo sapiens]	no	no	Yes	12	2	5	-		-	mitochondrial mRNA catabolic process, positive regulation of mitochondrial RNA catabolic process, mitochondrial RNA 3'-end processing, DNA recombination, RNA catabolic process, positive regulation of cell growth, DNA duplex unwinding, mitochondrial ncRNA surveillance, mitochondrial mRNA surveillance, negative regulation of apoptotic process, mitochondrion morphogenesis, chromatin maintenance, mit…
	126	COQ8A	Q8NI60-1	Atypical kinase COQ8A, mitochondrial [OS=Homo sapiens]	no	no	Yes	17	9	14	-		-	protein phosphorylation, ubiquinone biosynthetic process,
	127	ATG16L1	Q676U5	Autophagy-related protein 16-1 [OS=Homo sapiens]	no	no	Yes	14	6	15	-		-	autophagosome assembly, protein transport, macroautophagy, negative stranded viral RNA replication, protein homooligomerization,
	128	BCLAF1	Q9NYF8-1	Bcl-2-associated transcription factor 1 [OS=Homo sapiens]	no	no	Yes	50	50	9	-		-	transcription, DNA-templated, apoptotic process, positive regulation of apoptotic process, regulation of DNA-templated transcription in response to stress, negative regulation of transcription, DNA-templated, positive regulation of DNA-templated transcription, initiation, positive regulation of response to DNA damage stimulus, positive regulation of intrinsic apoptotic signaling pathway,
	129	BEST1	O76090	Bestrophin-1 [OS=Homo sapiens]	no	no	Yes	8	8	16	-		-	chloride transport, visual perception, bicarbonate transport, transepithelial chloride transport, ion transmembrane transport, detection of light stimulus involved in visual perception, regulation of calcium ion transport, chloride transmembrane transport,
	130	BET1L	Q9NYM9	BET1-like protein [OS=Homo sapiens]	no	no	Yes	11	8	42	-		-	ER to Golgi vesicle-mediated transport, protein transport, retrograde transport, endosome to Golgi, membrane fusion, regulation of retrograde vesicle-mediated transport, Golgi to ER,
	131	SLC25A14	O95258	Brain mitochondrial carrier protein 1 [OS=Homo sapiens]	no	no	Yes	15	10	11	-		-	translation, transport, mitochondrial transport, aerobic respiration, proton transport,
	132	BCAT2	O15382	Branched-chain-amino-acid aminotransferase, mitochondrial [OS=Homo sapiens]	Yes	Yes	Yes	16	11	15	-		-	Amino-acid biosynthesis, Branched-chain amino acid biosynthesis
	133	ARFGEF1	Q9Y6D6	Brefeldin A-inhibited guanine nucleotide-exchange protein 1 [OS=Homo sapiens]	no	no	Yes	31	27	7	-		-	exocytosis, Golgi organization, endomembrane system organization, protein transport, negative regulation of actin filament polymerization, neuron projection development, regulation of ARF protein signal transduction, negative regulation of GTPase activity, positive regulation of GTPase activity, positive regulation of protein kinase B signaling, positive regulation of protein glycosylation in Gol…
	134	MCU	Q8NE86	Calcium uniporter protein, mitochondrial [OS=Homo sapiens]	Yes	no	Yes	8	5	7	-		-	Calcium transport, Ion transport, Transport
	135	MICU3	Q86XE3	Calcium uptake protein 3, mitochondrial [OS=Homo sapiens]	no	no	Yes	11	4	8	-		-	mitochondrial calcium ion transmembrane transport
	136	SLC25A12	O75746	Calcium-binding mitochondrial carrier protein Aralar1 [OS=Homo sapiens]	no	no	Yes	9	7	8	-		-	gluconeogenesis, translation, aspartate transport, L-glutamate transport, malate-aspartate shuttle, response to calcium ion, L-glutamate transmembrane transport, L-aspartate transmembrane transport,
	137	SLC25A13	Q9UJS0	Calcium-binding mitochondrial carrier protein Aralar2 [OS=Homo sapiens]	no	no	Yes	10	5	11	-		-	gluconeogenesis, translation, ATP biosynthetic process, transport, aspartate transport, L-glutamate transport, malate-aspartate shuttle, cellular respiration, response to calcium ion, L-glutamate transmembrane transport, L-aspartate transmembrane transport,
	138	SLC25A24	Q6NUK1	Calcium-binding mitochondrial carrier protein SCaMC-1 [OS=Homo sapiens]	no	no	Yes	14	14	14	-		-	translation, mitochondrial transport, regulation of cell death, ATP transport, cellular response to oxidative stress, transmembrane transport, cellular response to calcium ion,
	139	SLC25A25	Q6KCM7	calcium-binding mitochondrial carrier protein SCaMC-2 [OS=Homo sapiens]	no	no	Yes	20	10	20	-		-	response to dietary excess, translation, response to activity, response to food, multicellular organism growth, camera-type eye development, cellular respiration, ATP metabolic process, transmembrane transport, adipose tissue development, calcium ion transmembrane transport,
	140	CA5B	Q9Y2D0	Carbonic anhydrase 5B, mitochondrial [OS=Homo sapiens]	no	no	Yes	6	6	12	-		-	one-carbon metabolic process, bicarbonate transport,
	141	CPT2	P23786	Carnitine O-palmitoyltransferase 2, mitochondrial [OS=Homo sapiens]	no	no	Yes	17	16	10	-		-	fatty acid beta-oxidation, carnitine shuttle,
	142	TRNT1	Q96Q11-1	CCA tRNA nucleotidyltransferase 1, mitochondrial [OS=Homo sapiens]	no	no	Yes	21	10	11	-		-	tRNA 3'-terminal CCA addition, RNA processing, protein targeting to mitochondrion, tRNA 3'-end processing, mitochondrial tRNA 3'-end processing,
	143	CYP11A1	P05108	cholesterol side-chain cleavage enzyme, mitochondrial [OS=Homo sapiens]	no	no	Yes	10	12	15	-		-	C21-steroid hormone biosynthetic process, glucocorticoid biosynthetic process, cholesterol metabolic process, sterol metabolic process, cortisol metabolic process, vitamin D metabolic process, secondary metabolite biosynthetic process, oxidation-reduction process,GO:0071375~cellular response to peptide hormone stimulus,
	144	CHDH	Q8NE62	Choline dehydrogenase, mitochondrial [OS=Homo sapiens]	no	no	Yes	47	11	11	-		-	glycine betaine biosynthetic process from choline, choline catabolic process, oxidation-reduction process,
	145	CS	O75390	citrate synthase, mitochondrial [OS=Homo sapiens]	Yes	Yes	Yes	8	5	16	-		-	Amino Acid metabolism; TCA Cycle
	146	MMAB	Q96EY8	Cob(I)yrinic acid a,c-diamide adenosyltransferase, mitochondrial [OS=Homo sapiens]	no	no	Yes	17	6	20	-		-	cobalamin metabolic process, cobalamin biosynthetic process,
	147	MMAB	Q96EY8	Cob(I)yrinic acid a,c-diamide adenosyltransferase, mitochondrial [OS=Homo sapiens]	no	no	Yes	17	6	20	-		-	cobalamin metabolic process, cobalamin biosynthetic process,
	148	COQ10B	Q9H8M1	Coenzyme Q-binding protein COQ10 homolog B, mitochondrial [OS=Homo sapiens]	no	no	Yes	23	3	22	-		-	ubiquinone biosynthetic process, cellular respiration,
	149	CCDC90B	Q9GZT6	Coiled-coil domain-containing protein 90B, mitochondrial [OS=Homo sapiens]	no	no	Yes	11	3	22	-		-	mitochondrial protein
	150	TIMMDC1	Q9NPL8	Complex I assembly factor TIMMDC1, mitochondrial [OS=Homo sapiens]	Yes	Yes	Yes	18	5	19	-		-	mitochondrial respiratory chain complex I assembly
	151	NDUFAF1	Q9Y375	Complex I intermediate-associated protein 30, mitochondrial [OS=Homo sapiens]	Yes	Yes	Yes	12	12	21	-		-	Complex I biogenesis
	152	CMC1	Q7Z7K0	COX assembly mitochondrial protein homolog [OS=Homo sapiens]	no	no	Yes	5	1	20	-		-	metal ion binding
	153	CKMT2	P17540	Creatine kinase S-type, mitochondrial [OS=Homo sapiens]	no	no	Yes	23	15	18	-		-	creatine metabolic process, muscle contraction, phosphorylation,
	154	CKMT1A	P12532	Creatine kinase U-type, mitochondrial [OS=Homo sapiens]	Yes	no	Yes	23	2	9	-		-	Creatine metabolism
	155	NFS1	Q9Y697	Cysteine desulfurase, mitochondrial [OS=Homo sapiens]	no	no	Yes	17	17	16	-		-	sulfur amino acid metabolic process, protein complex assembly, Mo-molybdopterin cofactor biosynthetic process, iron incorporation into metallo-sulfur cluster, molybdopterin cofactor biosynthetic process, small molecule metabolic process, [2Fe-2S] cluster assembly,
	156	UQCRC2	P22695	Cytochrome b-c1 complex subunit 2, mitochondrial [OS=Homo sapiens]	Yes	no	Yes	12	12	15	-		-	Electron Transport Chain
	157	COX16	Q9P0S2	Cytochrome c oxidase assembly protein COX16 homolog, mitochondrial [OS=Homo sapiens]	no	no	Yes	15	3	25	-		-	mitochondrial cytochrome c oxidase assembly
	158	COX5A	P20674	Cytochrome c oxidase subunit 5A, mitochondrial [OS=Homo sapiens]	no	no	Yes	11	3	15	-		-	mitochondrial electron transport, cytochrome c to oxygen, hydrogen ion transmembrane transport,
	159	COX5B	P10606	Cytochrome c oxidase subunit 5B, mitochondrial [OS=Homo sapiens]	no	no	Yes	12	2	22	-		-	mitochondrial electron transport, cytochrome c to oxygen, respiratory gaseous exchange, mitochondrial ATP synthesis coupled proton transport,
	160	COX7A2L	O14548	Cytochrome c oxidase subunit 7A-related protein, mitochondrial [OS=Homo sapiens]	no	no	Yes	35	2	31	-		-	mitochondrial electron transport, cytochrome c to oxygen, hydrogen ion transmembrane transport,
	161	COX7B2	Q8TF08	Cytochrome c oxidase subunit 7B2, mitochondrial [OS=Homo sapiens]	no	no	Yes	10	6	30	-		-	hydrogen ion transmembrane transport,
	162	COX8C	Q7Z4L0	Cytochrome c oxidase subunit 8C, mitochondrial [OS=Homo sapiens]	no	no	Yes	13	1	21	-		-	mitochondrial electron transport, cytochrome c to oxygen, hydrogen ion transmembrane transport,
	163	D2HGDH	Q8N465	D-2-hydroxyglutarate dehydrogenase, mitochondrial [OS=Homo sapiens]	no	no	Yes	19	5	11	-		-	2-oxoglutarate metabolic process, response to manganese ion, response to zinc ion, lactate oxidation, respiratory electron transport chain, response to cobalt ion, response to magnesium ion, cellular protein metabolic process, response to calcium ion,
	164	BDH1	Q02338	D-beta-hydroxybutyrate dehydrogenase, mitochondrial [OS=Homo sapiens]	Yes	Yes	Yes	23	5	15	-		-	Synthesis and Degradation of Ketone Bodies
	165	DHRS2	Q13268	dehydrogenase/reductase SDR family member 2, mitochondrial [OS=Homo sapiens]	no	no	Yes	29	7	14	-		-	C21-steroid hormone metabolic process, negative regulation of cell proliferation, response to toxic substance, cellular response to oxidative stress, myeloid dendritic cell differentiation, negative regulation of apoptotic process, oxidation-reduction process,
	166	ALDH4A1	P30038	Delta-1-pyrroline-5-carboxylate dehydrogenase, mitochondrial [OS=Homo sapiens]	no	no	Yes	15	13	13	-		-	glutamate biosynthetic process, proline metabolic process, proline biosynthetic process, proline catabolic process, proline catabolic process to glutamate, 4-hydroxyproline catabolic process, oxidation-reduction process,
	167	DHFR2	Q86XF0	Dihydrofolate reductase 2, mitochondrial [OS=Homo sapiens]	no	no	Yes	10	6	41	-		-	glycine biosynthetic process, one-carbon metabolic process, nucleotide biosynthetic process, thymidine biosynthetic process, tetrahydrofolate metabolic process, tetrahydrofolate biosynthetic process, oxidation-reduction process,
	168	DLD	P09622	Dihydrolipoyl dehydrogenase, mitochondrial [OS=Homo sapiens]	no	no	Yes	17	8	8	-		-	acetyl-CoA biosynthetic process from pyruvate, pyruvate metabolic process, tricarboxylic acid cycle, 2-oxoglutarate metabolic process, mitochondrial electron transport, NADH to ubiquinone, proteolysis, lysine catabolic process, gastrulation, aging, branched-chain amino acid catabolic process, lipoate metabolic process, regulation of acetyl-CoA biosynthetic process from pyruvate, regulation of mem…
	169	TFB1M	Q8WVM0	Dimethyladenosine transferase 1, mitochondrial [OS=Homo sapiens]	no	no	Yes	20	13	19	-		-	transcription, DNA-templated, regulation of transcription, DNA-templated, mitochondrion organization, rRNA methylation,
	170	TFB2M	Q9H5Q4	Dimethyladenosine transferase 2, mitochondrial [OS=Homo sapiens]	no	no	Yes	25	12	13	-		-	regulation of transcription, DNA-templated, transcription from mitochondrial promoter, transcription initiation from mitochondrial promoter, mitochondrion organization, rRNA methylation, positive regulation of transcription, DNA-templated,
	171	POLG2	Q9UHN1	DNA polymerase subunit gamma-2, mitochondrial [OS=Homo sapiens]	no	no	Yes	9	16	13	-		-	in utero embryonic development, DNA replication, DNA-dependent DNA replication, DNA repair, glycyl-tRNA aminoacylation, mitochondrion organization, respiratory electron transport chain, mitochondrial DNA metabolic process, mitochondrion morphogenesis, DNA biosynthetic process,
	172	TOP1MT	Q969P6	DNA topoisomerase I, mitochondrial [OS=Homo sapiens]	no	no	Yes	17	8	11	-		-	DNA replication, DNA topological change, chromatin remodeling, chromosome segregation,
	173	DNAJA3	Q96EY1-1	DnaJ homolog subfamily A member 3, mitochondrial [OS=Homo sapiens]	no	no	Yes	39	5	12	-		-	negative regulation of transcription from RNA polymerase II promoter, mitochondrial DNA replication, protein folding, negative regulation of protein kinase activity, activation of cysteine-type endopeptidase activity involved in apoptotic process, activation-induced cell death of T cells, mitochondrion organization, small GTPase mediated signal transduction, neuromuscular junction development, ce…
	174	ETFA	P13804-1	Electron transfer flavoprotein subunit alpha, mitochondrial [OS=Homo sapiens]	no	no	Yes	7	6	16	-		-	respiratory electron transport chain, fatty acid beta-oxidation using acyl-CoA dehydrogenase, lipid homeostasis,
	175	TSFM	P43897	Elongation factor Ts, mitochondrial [OS=Homo sapiens]	no	Yes	Yes	7	1	9	-		-	translational elongation, regulation of DNA-templated transcription, elongation, mitochondrial translational elongation,
	176	ERVK-19	Q9WJR5-1	Endogenous retrovirus group K member 19 Pol protein [OS=Homo sapiens]	no	no	Yes	30	24	10	-		-	RNA-dependent DNA biosynthetic process, DNA recombination, proteolysis, DNA integration, viral process, dUTP metabolic process, mRNA transport, RNA phosphodiester bond hydrolysis, endonucleolytic,
	177	ENDOG	Q14249	endonuclease G, mitochondrial [OS=Homo sapiens]	no	no	Yes	6	9	19	-		-	in utero embryonic development, apoptotic DNA fragmentation, DNA recombination, aging, response to mechanical stimulus, response to estradiol, response to tumor necrosis factor, neuron death in response to oxidative stress, response to antibiotic, cellular response to calcium ion, cellular response to glucose stimulus, cellular response to hypoxia, positive regulation of hydrogen peroxide-mediate…
	178	MECR	Q9BV79	Enoyl-[acyl-carrier-protein] reductase, mitochondrial [OS=Homo sapiens]	no	no	Yes	13	3	8	-		-	fatty acid metabolic process, fatty acid biosynthetic process, oxidation-reduction process,
	179	ECHDC2	Q86YB7-1	Enoyl-CoA hydratase domain-containing protein 2, mitochondrial [OS=Homo sapiens]	no	no	Yes	31	14	32	-		-	fatty acid beta-oxidation, metabolic process,
	180	ECHDC3	Q96DC8	Enoyl-CoA hydratase domain-containing protein 3, mitochondrial [OS=Homo sapiens]	no	no	Yes	11	2	9	-		-	metabolic process,
	181	ECHS1	P30084	Enoyl-CoA hydratase, mitochondrial [OS=Homo sapiens]	Yes	Yes	Yes	18	6	21	-		-	Fatty Acid Beta Oxidation; Fatty Acid Biosynthesis; Tryptophan metabolism
	182	N/A	P30042-1	ES1 protein homolog, mitochondrial [OS=Homo sapiens]	no	no	Yes	4	5	21	-		-	-
	183	SMDT1	Q9H4I9	Essential MCU regulator, mitochondrial [OS=Homo sapiens]	no	no	Yes	14	1	32	-		-	mitochondrial calcium ion transport, calcium ion transmembrane import into mitochondrion, mitochondrial calcium ion homeostasis,
	184	FDX2	Q6P4F2	Ferredoxin-2, mitochondrial [OS=Homo sapiens]	no	Yes	Yes	6	1	17	-		-	C21-steroid hormone biosynthetic process, sterol metabolic process, small molecule metabolic process, oxidation-reduction process,
	185	FECH	P22830-1	Ferrochelatase, mitochondrial [OS=Homo sapiens]	no	no	Yes	18	7	12	-		-	generation of precursor metabolites and energy, heme biosynthetic process, response to light stimulus, response to lead ion, response to insecticide, response to drug, response to ethanol, protoporphyrinogen IX metabolic process, response to arsenic-containing substance, response to methylmercury, response to platinum ion, cellular response to dexamethasone stimulus,
	186	FPGS	Q05932-1	Folylpolyglutamate synthase, mitochondrial [OS=Homo sapiens]	no	no	Yes	15	3	6	-		-	liver development, nucleobase-containing compound metabolic process, glutamate metabolic process, glycine metabolic process, one-carbon metabolic process, folic acid-containing compound metabolic process, brain development, cell proliferation, nucleoside metabolic process, drug metabolic process, organ regeneration, response to drug, folic acid metabolic process, tetrahydrofolylpolyglutamate bios…
	187	GJB6	O95452	Gap junction beta-6 protein [OS=Homo sapiens]	no	no	Yes	10	10	12	-		-	apoptotic process, cell communication, aging, sensory perception of sound, negative regulation of cell proliferation, response to lipopolysaccharide, ear morphogenesis, inner ear development, response to electrical stimulus, cellular response to glucose stimulus,
	188	GLUD2	P49448	Glutamate dehydrogenase 2, mitochondrial [OS=Homo sapiens]	Yes	no	Yes	20	9	12	-		-	Transcriptional activation of mitochondrial biogenesis; Glutamate and glutamine metabolism
	189	GATB	O75879	Glutamyl-tRNA(Gln) amidotransferase subunit B, mitochondrial [OS=Homo sapiens]	Yes	Yes	Yes	7	6	13	-		-	Protein biosynthesis
	190	GLRX2	Q9NS18	Glutaredoxin-2, mitochondrial [OS=Homo sapiens]	no	Yes	Yes	32	2	15	-		-	regulation of transcription, DNA-templated, glutathione metabolic process, apoptotic process, aging, response to temperature stimulus, regulation of signal transduction, response to organic substance, cell differentiation, DNA protection, response to hydrogen peroxide, cell redox homeostasis, response to redox state, oxidation-reduction process, cellular response to superoxide,
	191	GLRX5	Q86SX6	Glutaredoxin-related protein 5, mitochondrial [OS=Homo sapiens]	no	no	Yes	10	2	23	-		-	protein lipoylation, hemopoiesis, cell redox homeostasis, oxidation-reduction process,
	192	GCSH	P23434	Glycine cleavage system H protein, mitochondrial [OS=Homo sapiens]	no	no	Yes	12	1	16	-		-	glycine catabolic process, glycine decarboxylation via glycine cleavage system, methylation, ~glyoxylate metabolic process,
	193	GOLGA5	Q8TBA6	Golgin subfamily A member 5 [OS=Homo sapiens]	no	no	Yes	17	10	11	-		-	retrograde transport, vesicle recycling within Golgi, Golgi organization, Golgi vesicle transport,
	194	GRPEL2	Q8TAA5	GrpE protein homolog 2, mitochondrial [OS=Homo sapiens]	no	no	Yes	5	1	15	-		-	protein folding, protein import into mitochondrial matrix, regulation of catalytic activity,
	195	AK3	Q9UIJ7-1	GTP:AMP phosphotransferase AK3, mitochondrial [OS=Homo sapiens]	no	no	Yes	8	6	19	-		-	ADP biosynthetic process, blood coagulation, phosphorylation, AMP metabolic process, GTP metabolic process, ITP metabolic process, UTP metabolic process,
	196	HINT2	Q9BX68	Histidine triad nucleotide-binding protein 2, mitochondrial [OS=Homo sapiens]	Yes	no	Yes	18	3	20	-		-	Apoptosis, Lipid biosynthesis, Lipid metabolism, Steroid biosynthesis
	197	HAGH	Q16775-1	Hydroxyacylglutathione hydrolase, mitochondrial [OS=Homo sapiens]	no	no	Yes	17	1	10	-		-	pyruvate metabolic process, glutathione biosynthetic process, methylglyoxal catabolic process to D-lactate via S-lactoyl-glutathione,
	198	HTD2	P86397	Hydroxyacyl-thioester dehydratase type 2, mitochondrial [OS=Homo sapiens]	no	no	Yes	13	7	54	-		-	tRNA 5'-leader removal, rRNA processing, fatty acid metabolic process,
	199	HMGCL	P35914	Hydroxymethylglutaryl-CoA lyase, mitochondrial [OS=Homo sapiens]	Yes	no	Yes	10	4	21	-		-	Fatty acid/ketone metabolism
	200	HSD11B1L	Q7Z5J1-1	Hydroxysteroid 11-beta-dehydrogenase 1-like protein [OS=Homo sapiens]	no	no	Yes	10	9	24	-		-	oxidation-reduction process,
	201	INSR	P06213-1	insulin receptor [OS=Homo sapiens]	no	no	Yes	42	42	12	-		-	activation of MAPK activity, positive regulation of protein phosphorylation, heart morphogenesis, carbohydrate metabolic process, regulation of transcription, DNA-templated, transmembrane receptor protein tyrosine kinase signaling pathway, G-protein coupled receptor signaling pathway, positive regulation of cell proliferation, insulin receptor signaling pathway, epidermis development, male gonad …
	202	INTS6	Q9UL03	Integrator complex subunit 6 [OS=Homo sapiens]	no	no	Yes	17	11	10	-		-	signal transduction, snRNA processing, snRNA transcription from RNA polymerase II promoter,
	203	ISCA1	Q9BUE6	Iron-sulfur cluster assembly 1 homolog, mitochondrial [OS=Homo sapiens]	no	no	Yes	14	6	35	-		-	sulfur compound metabolic process, iron-sulfur cluster assembly, protein maturation by iron-sulfur cluster transfer,
	204	ISCA2	Q86U28	iron-sulfur cluster assembly 2 homolog, mitochondrial [OS=Homo sapiens]	no	no	Yes	8	6	23	-		-	sulfur compound metabolic process, iron-sulfur cluster assembly, protein maturation, protein maturation by iron-sulfur cluster transfer,
	205	IDH3A	P50213-1	Isocitrate dehydrogenase [NAD] subunit alpha, mitochondrial [OS=Homo sapiens]	no	no	Yes	10	10	17	-		-	carbohydrate metabolic process, tricarboxylic acid cycle,
	206	SORBS1	Q9BX66-12	Isoform 12 of Sorbin and SH3 domain-containing protein 1 [OS=Homo sapiens]	no	no	Yes	49	25	14	-		-	muscle contraction, actin filament organization, cell adhesion, cell-matrix adhesion, insulin receptor signaling pathway, positive regulation of signal transduction, glucose transport, cellular response to insulin stimulus, stress fiber assembly, positive regulation of glycogen biosynthetic process, positive regulation of glucose import, positive regulation of lipid biosynthetic process, focal ad…
	207	PDK1	Q15118-2	Isoform 2 of [Pyruvate dehydrogenase (acetyl-transferring)] kinase isozyme 1, mitochondrial [OS=Homo sapiens]	no	no	Yes	6	4	19	-		-	glucose metabolic process, protein phosphorylation, cell proliferation, intrinsic apoptotic signaling pathway in response to oxidative stress, regulation of acetyl-CoA biosynthetic process from pyruvate, regulation of glucose metabolic process, hypoxia-inducible factor-1alpha signaling pathway,
	208	MRPS22	P82650-2	Isoform 2 of 28S ribosomal protein S22, mitochondrial [OS=Homo sapiens]	no	no	Yes	5	1	17	-		-	mitochondrial translational elongation, mitochondrial translational termination,
	209	MRPS5	P82675-2	Isoform 2 of 28S ribosomal protein S5, mitochondrial [OS=Homo sapiens]	no	no	Yes	15	1	8	-		-	translation, mitochondrial translational elongation, mitochondrial translational termination,
	210	BCKDHA	P12694-2	Isoform 2 of 2-oxoisovalerate dehydrogenase subunit alpha, mitochondrial [OS=Homo sapiens]	no	Yes	Yes	7	7	21	-		-	branched-chain amino acid catabolic process, glyoxylate metabolic process, oxidation-reduction process,
	211	MRPL22	Q9NWU5-2	Isoform 2 of 39S ribosomal protein L22, mitochondrial [OS=Homo sapiens]	no	no	Yes	7	1	16	-		-	translation, mitochondrial translational elongation, mitochondrial translational termination,
	212	MRPL30	Q8TCC3-2	Isoform 2 of 39S ribosomal protein L30, mitochondrial [OS=Homo sapiens]	Yes	Yes	Yes	9	1	10	-		-	Mitochondrial translation initiation; Mitochondrial translation elongation; Mitochondrial translation termination
	213	MRPL48	Q96GC5-3	Isoform 2 of 39S ribosomal protein L48, mitochondrial [OS=Homo sapiens]	no	no	Yes	14	1	16	-		-	mitochondrial translational elongation, mitochondrial translational termination,
	214	MRPL55	Q7Z7F7-2	Isoform 2 of 39S ribosomal protein L55, mitochondrial [OS=Homo sapiens]	no	no	Yes	22	1	20	-		-	translation, mitochondrial translational elongation, mitochondrial translational termination,
	215	HIBCH	Q6NVY1-2	Isoform 2 of 3-hydroxyisobutyryl-CoA hydrolase, mitochondrial [OS=Homo sapiens]	no	no	Yes	7	3	8	-		-	valine catabolic process, fatty acid beta-oxidation, branched-chain amino acid catabolic process,
	216	AGK	Q53H12-2	Isoform 2 of Acylglycerol kinase, mitochondrial [OS=Homo sapiens]	no	no	Yes	4	1	34	-		-	long-chain fatty-acyl-CoA biosynthetic process, glycerolipid metabolic process, ceramide biosynthetic process, lipid phosphorylation,
	217	NUDT9	Q9BW91-2	Isoform 2 of ADP-ribose pyrophosphatase, mitochondrial [OS=Homo sapiens]	no	no	Yes	7	1	5	-		-	cation transport, nucleobase-containing small molecule catabolic process, ADP catabolic process, IDP catabolic process,
	218	ATP5F1A	P25705-2	Isoform 2 of ATP synthase subunit alpha, mitochondrial [OS=Homo sapiens]	no	no	Yes	35	2	13	-		-	negative regulation of endothelial cell proliferation, lipid metabolic process, ATP biosynthetic process, embryo development, synthesis coupled proton transport, ATP hydrolysis coupled proton transport, mitochondrial ATP synthesis coupled proton transport,
	219	DMAC2L	Q99766-2	Isoform 2 of ATP synthase subunit s, mitochondrial [OS=Homo sapiens]	no	no	Yes	5	1	26	-		-	ATP biosynthetic process, proton transport, mitochondrial ATP synthesis coupled proton transport,
	220	ATP5IF1	Q9UII2-2	Isoform 2 of ATPase inhibitor, mitochondrial [OS=Homo sapiens]	no	no	Yes	12	1	20	-		-	angiogenesis, negative regulation of endothelial cell proliferation, generation of precursor metabolites and energy, heme biosynthetic process, folic acid-containing compound biosynthetic process, erythrocyte differentiation, negative regulation of ATPase activity, tetrahydrofolate interconversion, protein homooligomerization, protein homotetramerization, negative regulation of hydrolase activity…
	221	COQ8A	Q8NI60-2	Isoform 2 of Atypical kinase COQ8A, mitochondrial [OS=Homo sapiens]	no	Yes	Yes	7	1	40	-		-	protein phosphorylation, ubiquinone biosynthetic process, phosphorylation,
	222	COQ10B	Q9H8M1-2	Isoform 2 of Coenzyme Q-binding protein COQ10 homolog B, mitochondrial [OS=Homo sapiens]	no	Yes	Yes	8	3	10	-		-	ubiquinone biosynthetic process, cellular respiration,
	223	CCDC90B	Q9GZT6-2	Isoform 2 of Coiled-coil domain-containing protein 90B, mitochondrial [OS=Homo sapiens]	no	no	Yes	11	5	26	-		-	mitochondrial protein
	224	GFM1	Q96RP9-2	Isoform 2 of Elongation factor G, mitochondrial [OS=Homo sapiens]	no	no	Yes	5	2	4	-		-	mitochondrial translational elongation,
	225	ECHDC2	Q86YB7-2	Isoform 2 of Enoyl-CoA hydratase domain-containing protein 2, mitochondrial [OS=Homo sapiens]	no	no	Yes	11	2	20	-		-	fatty acid beta-oxidation, metabolic process,
	226	FDX2	Q6P4F2-2	Isoform 2 of Ferredoxin-2, mitochondrial [OS=Homo sapiens]	no	no	Yes	6	3	16	-		-	C21-steroid hormone biosynthetic process, sterol metabolic process, small molecule metabolic process, oxidation-reduction process,
	227	HIGD1A	Q9Y241-2	Isoform 2 of HIG1 domain family member 1A, mitochondrial [OS=Homo sapiens]	no	no	Yes	14	6	63	-		-	negative regulation of apoptotic process, oxidation-reduction process,
	228	HAGH	Q16775-2	Isoform 2 of Hydroxyacylglutathione hydrolase, mitochondrial [OS=Homo sapiens]	no	no	Yes	8	1	13	-		-	pyruvate metabolic process, glutathione biosynthetic process, methylglyoxal catabolic process to D-lactate via S-lactoyl-glutathione,
	229	IDH3G	P51553-2	Isoform 2 of Isocitrate dehydrogenase [NAD] subunit gamma, mitochondrial [OS=Homo sapiens]	no	no	Yes	7	1	8	-		-	carbohydrate metabolic process,tricarboxylic acid cycle, isocitrate metabolic process,
	230	L2HGDH	Q9H9P8-2	Isoform 2 of L-2-hydroxyglutarate dehydrogenase, mitochondrial [OS=Homo sapiens]	no	no	Yes	50	1	12	-		-	2-oxoglutarate metabolic process, cellular protein metabolic process, oxidation-reduction process,
	231	ALDH6A1	Q02252-2	Isoform 2 of Methylmalonate-semialdehyde dehydrogenase [acylating], mitochondrial [OS=Homo sapiens]	no	no	Yes	5	2	8	-		-	thymine catabolic process, valine metabolic process, valine catabolic process, branched-chain amino acid catabolic process, thymine metabolic process, brown fat cell differentiation, oxidation-reduction process,
	232	SLC25A11	Q02978-2	Isoform 2 of Mitochondrial 2-oxoglutarate/malate carrier protein [OS=Homo sapiens]	no	no	Yes	19	1	8	-		-	glucose metabolic process, gluconeogenesis, translation, transport, alpha-ketoglutarate transport,
	233	MIEF2	Q96C03-2	Isoform 2 of Mitochondrial dynamics protein MID49 [OS=Homo sapiens]	no	no	Yes	67	4	32	-		-	mitochondrion organization, mitochondrial fusion, positive regulation of protein homooligomerization, positive regulation of mitochondrial fission positive regulation of protein targeting to membrane,
	234	MTFR2	Q6P444-2	Isoform 2 of Mitochondrial fission regulator 2 [OS=Homo sapiens]	no	no	Yes	5	1	80	-		-	mitochondrial fission, mitochondrion organization aerobic respiration,
	235	DNAJC19	Q96DA6-2	Isoform 2 of Mitochondrial import inner membrane translocase subunit TIM14 [OS=Homo sapiens]	no	no	Yes	9	1	19	-		-	0
	236	CHCHD4	Q8N4Q1-2	Isoform 2 of Mitochondrial intermembrane space import and assembly protein 40 [OS=Homo sapiens]	no	no	Yes	6	2	26	-		-	protein maturation by protein folding, protein import into mitochondrial intermembrane space, 'de novo' posttranslational protein folding, oxidation-reduction process,
	237	RHOT2	Q8IXI1-2	Isoform 2 of Mitochondrial Rho GTPase 2 [OS=Homo sapiens]	no	Yes	Yes	4	4	19	-		-	small GTPase mediated signal transduction, cellular homeostasis, mitochondrion transport along microtubule, regulation of small GTPase mediated signal transduction, mitochondrial outer membrane permeabilization,
	238	MTG1	Q9BT17-2	Isoform 2 of Mitochondrial ribosome-associated GTPase 1 [OS=Homo sapiens]	no	no	Yes	28	3	24	-		-	ribosome biogenesis, regulation of respiratory system process, regulation of mitochondrial translation,
	239	NADK2	Q4G0N4-2	Isoform 2 of NAD kinase 2, mitochondrial [OS=Homo sapiens]	no	no	Yes	7	1	5	-		-	NADP biosynthetic process, phosphorylation, AD metabolic process,
	240	NDUFA10	O95299-2	Isoform 2 of NADH dehydrogenase [ubiquinone] 1 alpha subcomplex subunit 10, mitochondrial [OS=Homo sapiens]	Yes	Yes	Yes	32	1	8	-		-	Electron transport; Respiratory Chain
	241	NDUFS7	O75251-2	Isoform 2 of NADH dehydrogenase [ubiquinone] iron-sulfur protein 7, mitochondrial [OS=Homo sapiens]	no	Yes	Yes	11	1	7	-		-	mitochondrial electron transport, NADH to ubiquinone, mitochondrial respiratory chain complex I assembly, oxidation-reduction process,
	242	NFU1	Q9UMS0-2	Isoform 2 of NFU1 iron-sulfur cluster scaffold homolog, mitochondrial [OS=Homo sapiens]	no	no	Yes	5	2	54	-		-	iron-sulfur cluster assembly,
	243	REXO2	Q9Y3B8-2	Isoform 2 of Oligoribonuclease, mitochondrial [OS=Homo sapiens]	no	no	Yes	4	1	10	-		-	nucleobase-containing compound metabolic process, nucleotide metabolic process, RNA phosphodiester bond hydrolysis, exonucleolytic,
	244	PTCD2	Q8WV60-2	Isoform 2 of Pentatricopeptide repeat-containing protein 2, mitochondrial [OS=Homo sapiens]	no	no	Yes	10	4	19	-		-	kidney development, liver development, mRNA processing, mitochondrion organization, muscle fiber development, regulation of mRNA processing, ventricular cardiac muscle tissue morphogenesis,
	245	PISD	Q9UG56-2	Isoform 2 of Phosphatidylserine decarboxylase proenzyme, mitochondrial [OS=Homo sapiens]	no	no	Yes	14	8	17	-		-	phosphatidylethanolamine biosynthetic process, phospholipid biosynthetic process, protein autoprocessing,
	246	PARL	Q9H300-2	Isoform 2 of Presenilins-associated rhomboid-like protein, mitochondrial [OS=Homo sapiens]	no	no	Yes	7	3	19	-		-	proteolysis, regulation of mitochondrion organization, protein processing, regulation of proteolysis, membrane protein proteolysis, negative regulation of release of cytochrome c from mitochondria, regulation of mitophagy, regulation of protein targeting to mitochondrion, regulation of reactive oxygen species metabolic process, negative regulation of intrinsic apoptotic signaling pathway,
	247	EARS2	Q5JPH6-2	Isoform 2 of Probable glutamate--tRNA ligase, mitochondrial [OS=Homo sapiens]	Yes	no	Yes	9	1	6	-		-	Mitochondrial tRNA aminoacylation
	248	HARS2	P49590-2	Isoform 2 of Probable histidine--tRNA ligase, mitochondrial [OS=Homo sapiens]	no	no	Yes	7	1	6	-		-	translation, tRNA aminoacylation for protein translation, histidyl-tRNA aminoacylation, mitochondrial translation,
	249	PCCA	P05165-2	Isoform 2 of Propionyl-CoA carboxylase alpha chain, mitochondrial [OS=Homo sapiens]	no	no	Yes	7	2	6	-		-	biotin metabolic process, short-chain fatty acid catabolic process, hemolysis by symbiont of host erythrocytes,
	250	NDUFAF7	Q7L592-2	Isoform 2 of Protein arginine methyltransferase NDUFAF7, mitochondrial [OS=Homo sapiens]	no	no	Yes	10	3	19	-		-	peptidyl-arginine methylation, to symmetrical-dimethyl arginine, mitochondrial respiratory chain complex I assembly, ATP metabolic process,
	251	COX10	Q12887-2	Isoform 2 of Protoheme IX farnesyltransferase, mitochondrial [OS=Homo sapiens]	no	Yes	Yes	21	6	20	-		-	mitochondrial fission, mitochondrial electron transport, cytochrome c to oxygen, heme biosynthetic process, heme a biosynthetic process, respiratory chain complex IV assembly, aerobic respiration, cellular respiration, heme O biosynthetic process, hydrogen ion transmembrane transport,
	252	RBFA	Q8N0V3-2	Isoform 2 of Putative ribosome-binding factor A, mitochondrial [OS=Homo sapiens]	no	no	Yes	20	3	17	-		-	rRNA processing,
	253	PDHX	O00330-2	Isoform 2 of Pyruvate dehydrogenase protein X component, mitochondrial [OS=Homo sapiens]	no	no	Yes	6	1	12	-		-	pyruvate metabolic process, metabolic process, regulation of acetyl-CoA biosynthetic process from pyruvate, glyoxylate metabolic process, mitochondrial acetyl-CoA biosynthetic process from pyruvate,
	254	GFM2	Q969S9-2	Isoform 2 of Ribosome-releasing factor 2, mitochondrial [OS=Homo sapiens]	no	no	Yes	18	6	11	-		-	mitochondrial translation, ribosome disassembly, mitochondrial translational elongation, mitochondrial translational termination,
	255	SLC25A26	Q70HW3-2	Isoform 2 of S-adenosylmethionine mitochondrial carrier protein [OS=Homo sapiens]	no	no	Yes	8	4	13	-		-	translation, transport, ion transport, S-adenosyl-L-methionine transport, S-adenosyl-L-methionine transmembrane transport,
	256	SDHC	Q99643-2	Isoform 2 of Succinate dehydrogenase cytochrome b560 subunit, mitochondrial [OS=Homo sapiens]	no	no	Yes	7	1	21	-		-	tricarboxylic acid cycle, mitochondrial electron transport, succinate to ubiquinone, aerobic respiration, oxidation-reduction process,
	257	SUCLG2	Q96I99-2	Isoform 2 of Succinate--CoA ligase [GDP-forming] subunit beta, mitochondrial [OS=Homo sapiens]	no	no	Yes	18	5	14	-		-	tricarboxylic acid cycle, succinyl-CoA metabolic process, succinate metabolic process, metabolic process,
	258	OXCT1	P55809-2	Isoform 2 of Succinyl-CoA:3-ketoacid coenzyme A transferase 1, mitochondrial [OS=Homo sapiens]	no	no	Yes	20	12	36	-		-	brain development, heart development, response to nutrient, metabolic process, response to hormone, response to activity, positive regulation of insulin secretion involved in cellular response to glucose stimulus, ketone catabolic process, response to drug, response to starvation, response to ethanol, cellular ketone body metabolic process, ketone body catabolic process, adipose tissue developmen…
	259	WARS2	Q9UGM6-2	Isoform 2 of Tryptophan--tRNA ligase, mitochondrial [OS=Homo sapiens]	no	no	Yes	21	1	10	-		-	vasculogenesis, tRNA aminoacylation for protein translation, tryptophanyl-tRNA aminoacylation,
	260	C10orf67	Q8IYJ2-2	Isoform 2 of Uncharacterized protein C10orf67, mitochondrial [OS=Homo sapiens]	no	Yes	Yes	11	7	11	-		-	mitochondrion organization, small GTPase mediated signal transduction, cellular homeostasis, mitochondrion transport along microtubule, regulation of small GTPase mediated signal transduction, mitochondrial outer membrane permeabilization,
	261	MYO15A	Q9UKN7-2	Isoform 2 of Unconventional myosin-XV [OS=Homo sapiens]	no	no	Yes	4	3	7	-		-	sensory perception of sound, locomotory behavior, inner ear morphogenesis,
	262	SYNJ2	O15056-3	Isoform 2A of Synaptojanin-2 [OS=Homo sapiens]	no	no	Yes	8	8	9	-		-	phosphatidylinositol biosynthetic process, phosphatidylinositol-3-phosphate biosynthetic process, phosphatidylinositol dephosphorylation,
	263	MRPS25	P82663-3	Isoform 3 of 28S ribosomal protein S25, mitochondrial [OS=Homo sapiens]	no	no	Yes	13	1	22	-		-	mitochondrial translational elongation, mitochondrial translational termination,
	264	ALAS2	P22557-3	Isoform 3 of 5-aminolevulinate synthase, erythroid-specific, mitochondrial [OS=Homo sapiens]	no	no	Yes	4	1	16	-		-	response to hypoxia, porphyrin-containing compound metabolic process, protoporphyrinogen IX biosynthetic process, heme biosynthetic process, cellular iron ion homeostasis, biosynthetic process, erythrocyte differentiation, oxygen homeostasis, hemoglobin biosynthetic process,
	265	ACSF2	Q96CM8-3	Isoform 3 of Acyl-CoA synthetase family member 2, mitochondrial [OS=Homo sapiens]	no	Yes	Yes	22	6	11	-		-	fatty acid metabolic process, metabolic process, long-chain fatty-acyl-CoA biosynthetic process,
	266	AMT	P48728-3	Isoform 3 of Aminomethyltransferase, mitochondrial [OS=Homo sapiens]	no	no	Yes	20	1	6	-		-	glycine catabolic process, lycine decarboxylation via glycine cleavage system, methylation, glyoxylate metabolic process,
	267	SLC25A14	O95258-3	Isoform 3 of Brain mitochondrial carrier protein 1 [OS=Homo sapiens]	no	no	Yes	18	5	13	-		-	translation, transport, mitochondrial transport, aerobic respiration, proton transport,
	268	CCDC90B	Q9GZT6-3	Isoform 3 of Coiled-coil domain-containing protein 90B, mitochondrial [OS=Homo sapiens]	no	no	Yes	26	8	31	-		-	mitochondrial protein
	269	RFX8	Q6ZV50-3	Isoform 3 of DNA-binding protein RFX8 [OS=Homo sapiens]	no	no	Yes	11	7	16	-		-	transcription, DNA-templated, regulation of transcription, DNA-templated, regulation of transcription from RNA polymerase II promoter,endocrine pancreas development,
	270	GLS	O94925-3	Isoform 3 of Glutaminase kidney isoform, mitochondrial [OS=Homo sapiens]	Yes	no	Yes	13	4	8	-		-	cellular amino acid biosynthetic process
	271	RHOT1	Q8IXI2-3	Isoform 3 of Mitochondrial Rho GTPase 1 [OS=Homo sapiens]	no	no	Yes	10	8	10	-		-	mitochondrion organization, small GTPase mediated signal transduction, cellular homeostasis, mitochondrion transport along microtubule, regulation of small GTPase mediated signal transduction, mitochondrial outer membrane permeabilization,
	272	TRMU	O75648-3	Isoform 3 of Mitochondrial tRNA-specific 2-thiouridylase 1 [OS=Homo sapiens]	no	Yes	Yes	9	2	28	-		-	tRNA wobble position uridine thiolation, tRNA processing, mitochondrial tRNA thio-modification,
	273	PTCD2	Q8WV60-3	Isoform 3 of Pentatricopeptide repeat-containing protein 2, mitochondrial [OS=Homo sapiens]	no	Yes	Yes	24	1	14	-		-	kidney development, liver development, mRNA processing, mitochondrion organization, muscle fiber development, regulation of mRNA processing, ventricular cardiac muscle tissue morphogenesis,
	274	HTRA2	O43464-3	Isoform 3 of Serine protease HTRA2, mitochondrial [OS=Homo sapiens]	no	no	Yes	9	3	9	-		-	proteolysis, ceramide metabolic process, mitochondrion organization, aging, adult walking behavior, intrinsic apoptotic signaling pathway in response to DNA damage, response to herbicide, positive regulation of cell death, protein autoprocessing, pentacyclic triterpenoid metabolic process, forebrain development, cellular response to oxidative stress, cellular response to heat, cellular response t…
	275	SDHD	O14521-3	Isoform 3 of Succinate dehydrogenase [ubiquinone] cytochrome b small subunit, mitochondrial [OS=Homo sapiens]	no	no	Yes	11	12	45	-		-	tricarboxylic acid cycle, mitochondrial electron transport, succinate to ubiquinone,
	276	VARS2	Q5ST30-3	Isoform 3 of Valine--tRNA ligase, mitochondrial [OS=Homo sapiens]	no	no	Yes	11	7	16	-		-	tRNA aminoacylation for protein translation, valyl-tRNA aminoacylation, regulation of translational fidelity,
	277	ACADVL	P49748-3	Isoform 3 of Very long-chain specific acyl-CoA dehydrogenase, mitochondrial [OS=Homo sapiens]	Yes	no	Yes	9	13	13	-		-	Fatty Acid Beta Oxidation
	278	ALAS2	P22557-4	Isoform 4 of 5-aminolevulinate synthase, erythroid-specific, mitochondrial [OS=Homo sapiens]	no	no	Yes	45	10	12	-		-	generation of precursor metabolites and energy, steroid biosynthetic process, C21-steroid hormone biosynthetic process, cholesterol metabolic process, sterol metabolic process, oxidation-reduction process, NADPH oxidation,
	279	AMT	P48728-4	Isoform 4 of Aminomethyltransferase, mitochondrial [OS=Homo sapiens]	no	no	Yes	5	1	8	-		-	glycine catabolic process, lycine decarboxylation via glycine cleavage system, methylation, glyoxylate metabolic process,
	280	GSR	P00390-5	Isoform 4 of Glutathione reductase, mitochondrial [OS=Homo sapiens]	no	Yes	Yes	6	1	4	-		-	response to reactive oxygen species, glutathione metabolic process, nucleobase-containing small molecule interconversion, cell redox homeostasis oxidation-reduction process, cellular oxidant detoxification,
	281	MRS2	Q9HD23-4	Isoform 4 of Magnesium transporter MRS2 homolog, mitochondrial [OS=Homo sapiens]	Yes	Yes	Yes	5	4	15	-		-	Miscellaneous transport and binding events
	282	PRORP	O15091-4	Isoform 4 of Mitochondrial ribonuclease P protein 3 [OS=Homo sapiens]	no	no	Yes	10	3	13	-		-	tRNA 5'-leader removal, tRNA processing, RNA phosphodiester bond hydrolysis, endonucleolytic, mitochondrial tRNA processing,
	283	TRMU	O75648-4	Isoform 4 of Mitochondrial tRNA-specific 2-thiouridylase 1 [OS=Homo sapiens]	no	no	Yes	12	1	8	-		-	tRNA wobble position uridine thiolation, tRNA processing, mitochondrial tRNA thio-modification,
	284	FDXR	P22570-4	Isoform 4 of NADPH:adrenodoxin oxidoreductase, mitochondrial [OS=Homo sapiens]	no	no	Yes	13	4	11	-		-	generation of precursor metabolites and energy, steroid biosynthetic process, C21-steroid hormone biosynthetic process, cholesterol metabolic process, sterol metabolic process, oxidation-reduction process, NADPH oxidation,
	285	BRSK2	Q8IWQ3-4	Isoform 4 of Serine/threonine-protein kinase BRSK2 [OS=Homo sapiens]	no	no	Yes	21	7	17	-		-	G2/M transition of mitotic cell cycle, protein phosphorylation, exocytosis, mitotic nuclear division, axonogenesis, peptidyl-serine phosphorylation, establishment of cell polarity, neuron differentiation, actin cytoskeleton reorganization, ERAD pathway, regulation of ATPase activity, cell division, regulation of insulin secretion involved in cellular response to glucose stimulus, intrinsic apopto…
	286	SOD2	P04179-4	Isoform 4 of Superoxide dismutase [Mn], mitochondrial [OS=Homo sapiens]	no	no	Yes	8	3	28	-		-	response to reactive oxygen species, response to superoxide, age-dependent response to oxidative stress, age-dependent response to reactive oxygen species, response to hypoxia, release of cytochrome c from mitochondria, liver development, detection of oxygen, vasodilation by acetylcholine involved in regulation of systemic arterial blood pressure, regulation of transcription from RNA polymerase I…
	287	TXNRD2	Q9NNW7-4	Isoform 4 of Thioredoxin reductase 2, mitochondrial [OS=Homo sapiens]	no	no	Yes	7	1	10	-		-	response to reactive oxygen species, response to oxygen radical, cell redox homeostasis, oxidation-reduction process, cellular oxidant detoxification,
	288	GTPBP3	Q969Y2-4	Isoform 4 of tRNA modification GTPase GTPBP3, mitochondrial [OS=Homo sapiens]	no	Yes	Yes	10	2	13	-		-	tRNA wobble uridine modification, tRNA methylation,
	289	SLC25A25	Q6KCM7-5	Isoform 5 of Calcium-binding mitochondrial carrier protein SCaMC-2 [OS=Homo sapiens]	no	no	Yes	13	1	16	-		-	response to dietary excess, translation, response to activity, response to food, multicellular organism growth, camera-type eye development, cellular respiration, ATP metabolic process, transmembrane transport, adipose tissue development, calcium ion transmembrane transport,
	290	ETS1	P14921-5	Isoform 5 of Protein C-ets-1 [OS=Homo sapiens]	no	no	Yes	15	9	21	-		-	response to hypoxia, transcription from RNA polymerase II promoter, immune response, female pregnancy, positive regulation of cell proliferation, negative regulation of cell proliferation, response to mechanical stimulus, positive regulation of endothelial cell migration, regulation of extracellular matrix disassembly, hypothalamus development, pituitary gland development, PML body organization, …
	291	MRRF	Q96E11-5	Isoform 5 of Ribosome-recycling factor, mitochondrial [OS=Homo sapiens]	no	no	Yes	6	6	30	-		-	translation, ribosome disassembly, mitochondrial translational termination,
	292	DGUOK	Q16854-6	Isoform 6 of Deoxyguanosine kinase, mitochondrial [OS=Homo sapiens]	no	no	Yes	5	3	37	-		-	protein phosphorylation, guanosine metabolic process deoxyribonucleoside monophosphate biosynthetic process, nucleotide biosynthetic process, negative regulation of neuron projection development, purine-containing compound salvage, dGTP metabolic process, purine deoxyribonucleoside metabolic process,
	293	LDLRAD4	O15165-6	Isoform 6 of Low-density lipoprotein receptor class A domain-containing protein 4 [OS=Homo sapiens]	no	no	Yes	7	7	22	-		-	negative regulation of epithelial to mesenchymal transition, negative regulation of SMAD protein complex assembly, negative regulation of cell migration, negative regulation of transforming growth factor beta receptor signaling pathway, negative regulation of pathway-restricted SMAD protein phosphorylation,
	294	PDLIM5	Q96HC4-6	Isoform 6 of PDZ and LIM domain protein 5 [OS=Homo sapiens]	no	no	Yes	19	11	17	-		-	regulation of synapse assembly, regulation of dendritic spine morphogenesis, cell growth involved in cardiac muscle cell development, cell-cell adhesion,
	295	MRRF	Q96E11-6	Isoform 6 of Ribosome-recycling factor, mitochondrial [OS=Homo sapiens]	no	no	Yes	15	1	19	-		-	translation, ribosome disassembly, mitochondrial translational termination,
	296	RHOT1	Q8IXI2-7	Isoform 7 of Mitochondrial Rho GTPase 1 [OS=Homo sapiens]	no	Yes	Yes	6	2	12	-		-	mitochondrion organization, small GTPase mediated signal transduction, cellular homeostasis, mitochondrion transport along microtubule, regulation of small GTPase mediated signal transduction, mitochondrial outer membrane permeabilization,
	297	TMLHE	Q9NVH6-8	Isoform 8 of Trimethyllysine dioxygenase, mitochondrial [OS=Homo sapiens]	Yes	Yes	Yes	36	7	16	-		-	carnitine biosynthesis
	298	MLYCD	O95822-2	Isoform Cytoplasmic+peroxisomal of Malonyl-CoA decarboxylase, mitochondrial [OS=Homo sapiens]	no	no	Yes	15	4	24	-		-	response to ischemia, acetyl-CoA biosynthetic process, fatty acid biosynthetic process, acyl-CoA metabolic process, regulation of glucose metabolic process, positive regulation of fatty acid oxidation, malonyl-CoA catabolic process,
	299	ERAL1	O75616-2	Isoform HERA-B of GTPase Era, mitochondrial [OS=Homo sapiens]	no	Yes	Yes	11	1	8	-		-	ribosomal small subunit assembly,
	300	KARS1	Q15046-2	Isoform Mitochondrial of Lysine--tRNA ligase [OS=Homo sapiens]	Yes	no	Yes	6	3	9	-		-	Selenoamino acid metabolism; Cytosolic tRNA aminoacylation; Mitochondrial tRNA aminoacylation
	301	IVD	P26440	Isovaleryl-CoA dehydrogenase, mitochondrial [OS=Homo sapiens]	no	no	Yes	34	10	15	-		-	leucine catabolic process, branched-chain amino acid catabolic process, fatty acid beta-oxidation using acyl-CoA dehydrogenase, lipid homeostasis,
	302	KRIT1	O00522	Krev interaction trapped protein 1 [OS=Homo sapiens]	no	no	Yes	18	18	9	-		-	angiogenesis, negative regulation of endothelial cell proliferation, small GTPase mediated signal transduction, negative regulation of endothelial cell migration, negative regulation of angiogenesis, positive regulation of protein binding, cell redox homeostasis, regulation of catalytic activity, regulation of establishment of cell polarity, negative regulation of endothelial cell apoptotic proce…
	303	AADAT	Q8N5Z0-1	Kynurenine/alpha-aminoadipate aminotransferase, mitochondrial [OS=Homo sapiens]	no	no	Yes	22	18	21	-		-	2-oxoglutarate metabolic process, glutamate metabolic process, lysine catabolic process, tryptophan catabolic process, biosynthetic process, tryptophan catabolic process to kynurenine, L-lysine catabolic process to acetyl-CoA via saccharopine, kynurenine metabolic process,
	304	L2HGDH	Q9H9P8-1	L-2-hydroxyglutarate dehydrogenase, mitochondrial [OS=Homo sapiens]	no	no	Yes	19	3	12	-		-	2-oxoglutarate metabolic process, cellular protein metabolic process, oxidation-reduction process,
	305	IL4I1	Q96RQ9	L-amino-acid oxidase [OS=Homo sapiens]	no	no	Yes	17	21	20	-		-	L-phenylalanine catabolic process, oxidation-reduction process,
	306	LHX2	P50458	LIM/homeobox protein Lhx2 [OS=Homo sapiens]	no	no	Yes	14	12	13	-		-	neural tube closure, hair follicle development, transcription, DNA-templated, regulation of transcription, DNA-templated, axon guidance, ~mesoderm development, dorsal/ventral pattern formation, olfactory bulb development, telencephalon regionalization, cerebral cortex development, maintenance of epithelial cell apical/basal polarity, positive regulation of transcription, DNA-templated, positive r…
	307	LIPM	Q5VYY2	Lipase member M [OS=Homo sapiens]	no	no	Yes	16	16	21	-		-	lipid catabolic process, lipid digestion,
	308	LIAS	O43766-1	Lipoyl synthase, mitochondrial [OS=Homo sapiens]	no	no	Yes	28	6	11	-		-	neural tube closure, inflammatory response, response to oxidative stress, lipoate biosynthetic process, protein lipoylation, response to lipopolysaccharide, glyoxylate metabolic process,
	309	LIPT1	Q9Y234	lipoyltransferase 1, mitochondrial [OS=Homo sapiens]	no	no	Yes	33	6	16	-		-	cellular protein modification process, lipid metabolic process, protein lipoylation, glyoxylate metabolic process,
	310	LONP1	P36776	Lon protease homolog, mitochondrial [OS=Homo sapiens]	no	no	Yes	22	18	10	-		-	mitochondrial genome maintenance, response to hypoxia, misfolded or incompletely synthesized protein catabolic process, mitochondrion organization, aging, response to hormone, response to aluminum ion, protein catabolic process, mitochondrial DNA metabolic process, cellular response to oxidative stress, chaperone-mediated protein complex assembly, protein homooligomerization, proteolysis involved…
	311	LUC7L3	O95232-1	Luc7-like protein 3 [OS=Homo sapiens]	no	no	Yes	10	10	13	-		-	mRNA splice site selection, RNA splicing,
	312	MRS2	Q9HD23	magnesium transporter MRS2 homolog, mitochondrial [OS=Homo sapiens]	no	no	Yes	17	10	10	-		-	mitochondrial magnesium ion transport, transmembrane transport, mitochondrial magnesium ion transmembrane transport,
	313	MLYCD	O95822	Malonyl-CoA decarboxylase, mitochondrial [OS=Homo sapiens]	Yes	no	Yes	15	15	17	-		-	Fatty acid biosynthesis, Fatty acid metabolism, Lipid biosynthesis, Lipid metabolism
	314	MCAT	Q8IVS2	Malonyl-CoA-acyl carrier protein transacylase, mitochondrial [OS=Homo sapiens]	no	no	Yes	26	9	10	-		-	fatty acid biosynthetic process, metabolic process,
	315	ADPRM	Q3LIE5-1	Manganese-dependent ADP-ribose/CDP-alcohol diphosphatase [OS=Homo sapiens]	no	no	Yes	6	6	14	-		-	nucleobase-containing small molecule catabolic process,
	316	MED30	Q96HR3	Mediator of RNA polymerase II transcription subunit 30 [OS=Homo sapiens]	no	no	Yes	15	7	34	-		-	regulation of transcription from RNA polymerase II promoter, transcription initiation from RNA polymerase II promoter, protein ubiquitination, stem cell population maintenance, intracellular steroid hormone receptor signaling pathway, androgen receptor signaling pathway, positive regulation of transcription, DNA-templated,
	317	MAMSTR	Q6ZN01	MEF2-activating motif and SAP domain-containing transcriptional regulator [OS=Homo sapiens]	no	no	Yes	8	3	8	-		-	transcription, DNA-templated, positive regulation of myotube differentiation, positive regulation of transcription from RNA polymerase II promoter,
	318	MAGI2	Q86UL8-1	Membrane-associated guanylate kinase, WW and PDZ domain-containing protein 2 [OS=Homo sapiens]	no	no	Yes	24	23	6	-		-	positive regulation of receptor internalization, planar cell polarity pathway involved in axis elongation, signal transduction, negative regulation of cell proliferation, positive regulation of neuron projection development, negative regulation of cell migration, positive regulation of phosphoprotein phosphatase activity, negative regulation of activin receptor signaling pathway, nerve growth fac…
	319	OMA1	Q96E52-1	Metalloendopeptidase OMA1, mitochondrial [OS=Homo sapiens]	no	no	Yes	24	11	19	-		-	diet induced thermogenesis, glucose metabolic process, misfolded or incompletely synthesized protein catabolic process, lipid metabolic process, response to stress, negative regulation of mitochondrial fusion, mitochondrial protein processing, cristae formation, energy homeostasis,
	320	MSRB2	Q9Y3D2	Methionine-R-sulfoxide reductase B2, mitochondrial [OS=Homo sapiens]	Yes	Yes	Yes	10	4	16	-		-	Protein repair
	321	MCCC1	Q96RQ3	Methylcrotonoyl-CoA carboxylase subunit alpha, mitochondrial [OS=Homo sapiens]	Yes	no	Yes	22	11	11	-		-	Branched-chain amino acid catabolism
	322	AUH	Q13825	methylglutaconyl-CoA hydratase, mitochondrial [OS=Homo sapiens]	Yes	Yes	Yes	10	11	18	-		-	Branched-chain amino acid catabolism
	323	MMADHC	Q9H3L0	Methylmalonic aciduria and homocystinuria type D protein, mitochondrial [OS=Homo sapiens]	no	no	Yes	9	6	16	-		-	coenzyme biosynthetic process, cobalamin metabolic process,
	324	MCEE	Q96PE7	Methylmalonyl-CoA epimerase, mitochondrial [OS=Homo sapiens]	no	no	Yes	7	1	19	-		-	short-chain fatty acid catabolic process, L-methylmalonyl-CoA metabolic process,
	325	MMUT	P22033	Methylmalonyl-CoA mutase, mitochondrial [OS=Homo sapiens]	no	no	Yes	13	15	10	-		-	metabolic process, cobalamin metabolic process, post-embryonic development, short-chain fatty acid catabolic process, homocysteine metabolic process,
	326	MMUT	P22033	Methylmalonyl-CoA mutase, mitochondrial [OS=Homo sapiens]	no	no	Yes	13	15	10	-		-	metabolic process, cobalamin metabolic process, post-embryonic development, short-chain fatty acid catabolic process, homocysteine metabolic process,
	327	CSKMT	A8MUP2	methyltransferase-like protein 12, mitochondrial [OS=Homo sapiens]	no	no	Yes	15	5	16	-		-	methylation,
	328	METTL17	Q9H7H0	Methyltransferase-like protein 17, mitochondrial [OS=Homo sapiens]	no	no	Yes	4	4	13	-		-	translation, respiratory chain complex IV assembly, aerobic respiration, methylation,
	329	MAPT	P10636	Microtubule-associated protein tau [OS=Homo sapiens]	no	no	Yes	28	26	19	-		-	microtubule cytoskeleton organization, neuron migration, adult walking behavior, axo-dendritic transport, regulation of autophagy, regulation of microtubule polymerization, positive regulation of microtubule polymerization, negative regulation of intracellular transport, positive regulation of axon extension, mitochondrion transport along microtubule, axon extension, generation of neurons, regula…
	330	MTARC2	Q969Z3-1	Mitochondrial amidoxime reducing component 2 [OS=Homo sapiens]	no	no	Yes	17	5	12	-		-	nitrate metabolic process, detoxification of nitrogen compound, oxidation-reduction process,
	331	MTARC1	Q5VT66-1	Mitochondrial amidoxime-reducing component 1 [OS=Homo sapiens]	no	no	Yes	7	3	10	-		-	nitrate metabolic process, detoxification of nitrogen compound, oxidation-reduction process,
	332	MALSU1	Q96EH3	mitochondrial assembly of ribosomal large subunit protein 1 [OS=Homo sapiens]	no	no	Yes	11	11	26	-		-	ribosomal large subunit biogenesis, negative regulation of mitochondrial translation, negative regulation of ribosome biogenesis,
	333	UCP1	P25874	Mitochondrial brown fat uncoupling protein 1 [OS=Homo sapiens]	no	no	Yes	12	4	19	-		-	regulation of transcription from RNA polymerase II promoter, translation, mitochondrial transport, response to temperature stimulus, proton transport, response to nutrient levels, cellular response to hormone stimulus, cellular response to reactive oxygen species, brown fat cell differentiation, cellular response to fatty acid, regulation of reactive oxygen species biosynthetic process, ~mitochon…
	334	PLD6	Q8N2A8	mitochondrial cardiolipin hydrolase [OS=Homo sapiens]	no	Yes	Yes	9	5	24	-		-	meiotic nuclear division, spermatid development, mitochondrial fusion, positive regulation of mitochondrial fusion, lipid catabolic process, P granule organization, cardiolipin biosynthetic process, piRNA metabolic process, DNA methylation involved in gamete generation, RNA phosphodiester bond hydrolysis, endonucleolytic,
	335	SLC25A20	O43772	mitochondrial carnitine/acylcarnitine carrier protein [OS=Homo sapiens]	no	no	Yes	18	8	31	-		-	translation, transport, carnitine shuttle, acyl carnitine transmembrane transport,
	336	MTCH1	Q9NZJ7	Mitochondrial carrier homolog 1 [OS=Homo sapiens]	no	no	Yes	17	9	21	-		-	transport, apoptotic process, activation of cysteine-type endopeptidase activity involved in apoptotic process, regulation of signal transduction, positive regulation of apoptotic process, neuronal ion channel clustering,
	337	SLC25A42	Q86VD7	Mitochondrial coenzyme A transporter SLC25A42 [OS=Homo sapiens]	no	no	Yes	9	5	13	-		-	translation, ADP transport, ATP transport, coenzyme A transmembrane transport, transmembrane transport, AMP transport,
	338	SLC25A10	Q9UBX3	Mitochondrial dicarboxylate carrier [OS=Homo sapiens]	no	no	Yes	7	6	11	-		-	gluconeogenesis, translation, transport, ion transport, dicarboxylic acid transport, mitochondrial transport, sulfide oxidation, using sulfide:quinone oxidoreductase,
	339	MIEF1	Q9NQG6	Mitochondrial dynamics protein MID51 [OS=Homo sapiens]	no	Yes	Yes	17	3	8	-		-	anatomical structure morphogenesis, mitochondrial translational elongation, mitochondrial translational termination,
	340	MTFR1	Q15390	Mitochondrial fission regulator 1 [OS=Homo sapiens]	no	no	Yes	13	4	8	-		-	mitochondrial fission, mitochondrion organization, aerobic respiration,
	341	MTFR2	Q6P444	Mitochondrial fission regulator 2 [OS=Homo sapiens]	no	no	Yes	21	7	22	-		-	mitochondrial fission, mitochondrion organization aerobic respiration,
	342	SLC25A32	Q9H2D1	Mitochondrial folate transporter/carrier [OS=Homo sapiens]	no	no	Yes	9	4	18	-		-	translation, glycine metabolic process, transport, mitochondrial transport, folic acid transport, folic acid metabolic process, folic acid import into mitochondrion,
	343	SLC25A22	Q9H936	Mitochondrial glutamate carrier 1 [OS=Homo sapiens]	Yes	no	Yes	15	10	21	-		-	aspartate transmembrane transport; ion transport; L-glutamate transmembrane transport; malate-aspartate shuttle
	344	TIMM10	P62072	Mitochondrial import inner membrane translocase subunit Tim10 [OS=Homo sapiens]	no	no	Yes	11	9	36	-		-	protein targeting to mitochondrion, sensory perception of sound, protein import into mitochondrial inner membrane, haperone-mediated protein transport,
	345	TIMM13	Q9Y5L4	mitochondrial import inner membrane translocase subunit TIM13 [OS=Homo sapiens]	no	no	Yes	11	3	28	-		-	protein targeting to mitochondrion, sensory perception of sound, protein transport, protein import into mitochondrial inner membrane, chaperone-mediated protein transport,
	346	DNAJC19	Q96DA6	mitochondrial import inner membrane translocase subunit TIM14 [OS=Homo sapiens]	no	no	Yes	11	9	36	-		-	protein folding, protein targeting to mitochondrion, visual perception, genitalia development,
	347	PAM16	Q9Y3D7	Mitochondrial import inner membrane translocase subunit TIM16 [OS=Homo sapiens]	no	no	Yes	56	7	18	-		-	ossification, protein import into mitochondrial matrix, negative regulation of ATPase activity,
	348	TIMM17A	Q99595	Mitochondrial import inner membrane translocase subunit Tim17-A [OS=Homo sapiens]	no	Yes	Yes	8	3	41	-		-	protein targeting to mitochondrion, intracellular protein transport, protein import into mitochondrial matrix,
	349	TIMM17B	O60830-1	Mitochondrial import inner membrane translocase subunit Tim17-B [OS=Homo sapiens]	no	no	Yes	22	5	21	-		-	protein targeting to mitochondrion, intracellular protein transport, protein import into mitochondrial matrix,
	350	TIMM22	Q9Y584	Mitochondrial import inner membrane translocase subunit TIM22 [OS=Homo sapiens]	no	Yes	Yes	10	1	20	-		-	protein targeting to mitochondrion, protein import into mitochondrial inner membrane,
	351	TIMM29	Q9BSF4	Mitochondrial import inner membrane translocase subunit Tim29 [OS=Homo sapiens]	Yes	no	Yes	4	3	18	-		-	protein insertion into mitochondrial inner membrane
	352	TIMM44	O43615	Mitochondrial import inner membrane translocase subunit TIM44 [OS=Homo sapiens]	Yes	Yes	Yes	16	18	21	-		-	Mitochondrial protein import
	353	TIMM8B	Q9Y5J9	mitochondrial import inner membrane translocase subunit Tim8 B [OS=Homo sapiens]	no	no	Yes	10	6	27	-		-	protein targeting to mitochondrion, sensory perception of sound, protein transport, chaperone-mediated protein transport,
	354	TOMM22	Q9NS69	Mitochondrial import receptor subunit TOM22 homolog [OS=Homo sapiens]	no	no	Yes	22	5	35	-		-	protein targeting to mitochondrion, intracellular protein transport, macroautophagy, protein import into mitochondrial matrix, protein import into mitochondrial outer membrane,
	355	TOMM6	Q96B49	Mitochondrial import receptor subunit TOM6 homolog [OS=Homo sapiens]	no	Yes	Yes	9	1	51	-		-	protein transport, macroautophagy,
	356	TOMM7	Q9P0U1	Mitochondrial import receptor subunit TOM7 homolog [OS=Homo sapiens]	no	no	Yes	4	1	56	-		-	protein targeting to mitochondrion, macroautophagy, protein import into mitochondrial matrix, regulation of protein stability, protein import into mitochondrial outer membrane, mitophagy in response to mitochondrial depolarization, positive regulation of protein targeting to mitochondrion,
	357	IMMP1L	Q96LU5	mitochondrial inner membrane protease subunit 1 [OS=Homo sapiens]	no	no	Yes	8	1	12	-		-	signal peptide processing, protein processing involved in protein targeting to mitochondrion mitochondrial respiratory chain complex assembly,
	358	TRUB2	O95900	Mitochondrial mRNA pseudouridine synthase TRUB2 [OS=Homo sapiens]	no	no	Yes	19	15	23	-		-	pseudouridine synthesis, RNA processing, tRNA processing,
	359	MPC1	Q9Y5U8	Mitochondrial pyruvate carrier 1 [OS=Homo sapiens]	no	no	Yes	18	8	44	-		-	mitochondrial pyruvate transport, mitochondrial acetyl-CoA biosynthetic process from pyruvate, mitochondrial pyruvate transmembrane transport,
	360	MPC1L	P0DKB6	Mitochondrial pyruvate carrier 1-like protein [OS=Homo sapiens]	no	no	Yes	9	9	38	-		-	mitochondrial pyruvate transport,
	361	MPC2	O95563	Mitochondrial pyruvate carrier 2 [OS=Homo sapiens]	no	no	Yes	6	1	24	-		-	mitochondrial pyruvate transport, positive regulation of insulin secretion involved in cellular response to glucose stimulus, mitochondrial acetyl-CoA biosynthetic process from pyruvate, mitochondrial pyruvate transmembrane transport,
	362	RHOT1	Q8IXI2-1	Mitochondrial Rho GTPase 1 [OS=Homo sapiens]	no	no	Yes	20	9	10	-		-	mitochondrion organization, small GTPase mediated signal transduction, cellular homeostasis, mitochondrion transport along microtubule, regulation of small GTPase mediated signal transduction, mitochondrial outer membrane permeabilization,
	363	PRORP	O15091	Mitochondrial ribonuclease P protein 3 [OS=Homo sapiens]	no	no	Yes	17	3	5	-		-	tRNA 5'-leader removal, tRNA processing, RNA phosphodiester bond hydrolysis, endonucleolytic, mitochondrial tRNA processing,
	364	MTG1	Q9BT17-1	Mitochondrial ribosome-associated GTPase 1 [OS=Homo sapiens]	no	no	Yes	23	8	18	-		-	ribosome biogenesis, regulation of respiratory system process, regulation of mitochondrial translation,
	365	MTG2	Q9H4K7	Mitochondrial ribosome-associated GTPase 2 [OS=Homo sapiens]	no	no	Yes	31	7	9	-		-	ribosome biogenesis, regulation of respiratory system process, regulation of mitochondrial translation,
	366	RPUSD4	Q96CM3	Mitochondrial RNA pseudouridine synthase RPUSD4 [OS=Homo sapiens]	no	no	Yes	36	8	16	-		-	pseudouridine synthesis, tRNA pseudouridine synthesis,
	367	SLC25A19	Q9HC21	Mitochondrial thiamine pyrophosphate carrier [OS=Homo sapiens]	no	Yes	Yes	17	1	6	-		-	translation, transport, deoxynucleotide transport, transmembrane transport,
	368	TRMU	O75648-1	Mitochondrial tRNA-specific 2-thiouridylase 1 [OS=Homo sapiens]	no	no	Yes	18	11	17	-		-	tRNA wobble position uridine thiolation, tRNA processing, mitochondrial tRNA thio-modification,
	369	MUL1	Q969V5	Mitochondrial ubiquitin ligase activator of NFKB 1 [OS=Homo sapiens]	no	no	Yes	13	5	19	-		-	mitochondrial fission, apoptotic process, activation of cysteine-type endopeptidase activity involved in apoptotic process, organelle organization, activation of JUN kinase activity, negative regulation of mitochondrial fusion, regulation of mitochondrion organization, protein ubiquitination, ~protein sumoylation, negative regulation of cell growth, regulation of protein stability, protein destab…
	370	UCP2	P55851	Mitochondrial uncoupling protein 2 [OS=Homo sapiens]	no	no	Yes	21	5	16	-		-	response to superoxide, response to hypoxia, translation, transport, mitochondrial transport, female pregnancy, aging, positive regulation of cell death, proton transport, cellular response to insulin stimulus, cellular response to amino acid starvation, negative regulation of apoptotic process, regulation of mitochondrial membrane potential, negative regulation of insulin secretion involved in c…
	371	UCP3	P55916-1	mitochondrial uncoupling protein 3 [OS=Homo sapiens]	no	no	Yes	10	7	29	-		-	response to superoxide, response to hypoxia, translation, lipid metabolic process, fatty acid metabolic process, mitochondrial transport, aging, response to nutrient, respiratory gaseous exchange, response to cold, response to activity, proton transport, response to insulin, cellular response to hormone stimulus, response to glucocorticoid,
	372	PMPCB	O75439	mitochondrial-processing peptidase subunit beta [OS=Homo sapiens]	no	no	Yes	11	5	13	-		-	mitochondrial electron transport, ubiquinol to cytochrome c, aerobic respiration, protein processing,
	373	NADK2	Q4G0N4	NAD kinase 2, mitochondrial [OS=Homo sapiens]	Yes	no	Yes	15	10	14	-		-	NADP biosynthetic process
	374	ME2	P23368-1	NAD-dependent malic enzyme, mitochondrial [OS=Homo sapiens]	no	no	Yes	10	13	14	-		-	pyruvate metabolic process, malate metabolic process, homophilic cell adhesion via plasma membrane adhesion molecules, calcium-dependent cell-cell adhesion via plasma membrane cell adhesion molecules, oxidation-reduction process, regulation of NADP metabolic process,
	375	SIRT3	Q9NTG7	NAD-dependent protein deacetylase sirtuin-3, mitochondrial [OS=Homo sapiens]	no	no	Yes	17	8	15	-		-	protein ADP-ribosylation, protein deacetylation, mitochondrion organization, aging, aerobic respiration, positive regulation of insulin secretion, peptidyl-lysine deacetylation, negative regulation of ERK1 and ERK2 cascade, histone H3 deacetylation, negative regulation of reactive oxygen species metabolic process, negative regulation of peptidyl-lysine acetylation,
	376	SIRT4	Q9Y6E7	NAD-dependent protein lipoamidase sirtuin-4, mitochondrial [OS=Homo sapiens]	no	Yes	Yes	7	3	9	-		-	regulation of glutamine family amino acid metabolic process, chromatin silencing, protein ADP-ribosylation, glutamine metabolic process, cellular response to DNA damage stimulus, negative regulation of cardiac muscle cell apoptotic process, peptidyl-lysine deacetylation, negative regulation of fatty acid oxidation, negative regulation of insulin secretion, positive regulation of lipid biosyntheti…
	377	NDUFA10	O95299	NADH dehydrogenase [ubiquinone] 1 alpha subcomplex subunit 10, mitochondrial [OS=Homo sapiens]	no	no	Yes	10	3	10	-		-	mitochondrial electron transport, NADH to ubiquinone, mitochondrial respiratory chain complex I assembly, response to drug, oxidation-reduction process,
	378	NDUFB1	O75438	NADH dehydrogenase [ubiquinone] 1 beta subcomplex subunit 1 [OS=Homo sapiens]	no	no	Yes	7	7	52	-		-	mitochondrial electron transport, NADH to ubiquinone, mitochondrial respiratory chain complex I assembly,
	379	NDUFB5	O43674-1	NADH dehydrogenase [ubiquinone] 1 beta subcomplex subunit 5, mitochondrial [OS=Homo sapiens]	no	Yes	Yes	10	1	14	-		-	mitochondrial electron transport, NADH to ubiquinone, mitochondrial respiratory chain complex I assembly,
	380	NDUFV1	P49821	NADH dehydrogenase [ubiquinone] flavoprotein 1, mitochondrial [OS=Homo sapiens]	no	no	Yes	15	12	12	-		-	mitochondrial electron transport, NADH to ubiquinone, aerobic respiration, mitochondrial respiratory chain complex I assembly,
	381	NDUFS2	O75306-1	NADH dehydrogenase [ubiquinone] iron-sulfur protein 2, mitochondrial [OS=Homo sapiens]	no	no	Yes	11	12	19	-		-	mitochondrial electron transport, NADH to ubiquinone, response to oxidative stress, mitochondrial respiratory chain complex I assembly,
	382	NDUFS8	O00217	NADH dehydrogenase [ubiquinone] iron-sulfur protein 8, mitochondrial [OS=Homo sapiens]	Yes	no	Yes	22	6	28	-		-	Electron transport, Respiratory chain, Transport
	383	NDUFS1	P28331-1	NADH-ubiquinone oxidoreductase 75 kDa subunit, mitochondrial [OS=Homo sapiens]	no	no	Yes	20	10	12	-		-	mitochondrial electron transport, NADH to ubiquinone, apoptotic mitochondrial changes, mitochondrial respiratory chain complex I assembly, ATP synthesis coupled electron transport, cellular respiration, ATP metabolic process, regulation of mitochondrial membrane potential, reactive oxygen species metabolic process,
	384	SYNE2	Q8WXH0-1	Nesprin-2 [OS=Homo sapiens]	no	no	Yes	156	153	7	-		-	nuclear envelope organization, nuclear migration, establishment or maintenance of cell polarity, fibroblast migration, positive regulation of cell migration, nuclear migration along microfilament, protein localization to nucleus, centrosome localization, cytoskeletal anchoring at nuclear membrane,
	385	NLN	Q9BYT8	Neurolysin, mitochondrial [OS=Homo sapiens]	no	no	Yes	24	22	11	-		-	regulation of gluconeogenesis, proteolysis, peptide metabolic process, regulation of skeletal muscle fiber differentiation,
	386	NME4	O00746	Nucleoside diphosphate kinase, mitochondrial [OS=Homo sapiens]	no	no	Yes	8	4	21	-		-	purine nucleotide metabolic process, nucleoside diphosphate phosphorylation, GTP biosynthetic process, pyrimidine nucleotide metabolic process, UTP biosynthetic process, CTP biosynthetic process, lipid transport, nucleoside metabolic process, nucleoside triphosphate biosynthetic process, nucleobase-containing small molecule interconversion, regulation of apoptotic process,
	387	CPOX	P36551	Oxygen-dependent coproporphyrinogen-III oxidase, mitochondrial [OS=Homo sapiens]	Yes	no	Yes	19	13	24	-		-	protoporphyrin-IX biosynthesis;
	388	P2RY11	Q96G91	P2Y purinoceptor 11 [OS=Homo sapiens]	no	no	Yes	8	8	18	-		-	adenosine receptor signaling pathway, defense response, G-protein coupled receptor signaling pathway, activation of adenylate cyclase activity, phospholipase C-activating G-protein coupled receptor signaling pathway calcium-mediated signaling, neuronal signal transduction,G-protein coupled purinergic nucleotide receptor signaling pathway, cellular response to ATP,
	389	MTRF1L	Q9UGC7-1	Peptide chain release factor 1-like, mitochondrial [OS=Homo sapiens]	no	no	Yes	10	1	6	-		-	mitochondrial translational termination,
	390	PDF	Q9HBH1	Peptide deformylase, mitochondrial [OS=Homo sapiens]	no	no	Yes	8	6	23	-		-	translation, positive regulation of cell proliferation, peptidyl-methionine modification, N-terminal protein amino acid modification,
	391	PPIF	P30405	Peptidyl-prolyl cis-trans isomerase F, mitochondrial [OS=Homo sapiens]	no	no	Yes	16	3	18	-		-	protein peptidyl-prolyl isomerization, response to ischemia, protein folding, apoptotic mitochondrial changes, regulation of proton-transporting ATPase activity, rotational mechanism, regulation of necrotic cell death, negative regulation of ATPase activity, negative regulation of apoptotic process, regulation of mitochondrial membrane permeability, necroptotic process, cellular response to hydro…
	392	PTRH2	Q9Y3E5	Peptidyl-tRNA hydrolase 2, mitochondrial [OS=Homo sapiens]	no	no	Yes	19	10	44	-		-	apoptotic process, negative regulation of gene expression, positive regulation of anoikis, negative regulation of anoikis,
	393	MRPL58	Q14197	Peptidyl-tRNA hydrolase ICT1, mitochondrial [OS=Homo sapiens]	no	no	Yes	22	1	10	-		-	mitochondrial translational elongation, mitochondrial translational termination, rescue of stalled ribosome,
	394	PRDX5	P30044-1	Peroxiredoxin-5, mitochondrial [OS=Homo sapiens]	no	no	Yes	33	3	31	-		-	response to reactive oxygen species, apoptotic process, inflammatory response, response to oxidative stress, negative regulation of transcription from RNA polymerase III promoter, positive regulation of collagen biosynthetic process, cellular response to reactive oxygen species, hydrogen peroxide catabolic process, negative regulation of apoptotic process, negative regulation of cysteine-type end…
	395	ETHE1	O95571	Persulfide dioxygenase ETHE1, mitochondrial [OS=Homo sapiens]	Yes	no	Yes	23	6	27	-		-	glutathione metabolic process;
	396	FARS2	O95363	phenylalanine--tRNA ligase, mitochondrial [OS=Homo sapiens]	no	no	Yes	7	7	12	-		-	tRNA aminoacylation for protein translation, phenylalanyl-tRNA aminoacylation, tRNA processing, tRNA aminoacylation,
	397	TAMM41	Q96BW9-1	Phosphatidate cytidylyltransferase, mitochondrial [OS=Homo sapiens]	no	no	Yes	13	13	19	-		-	CDP-diacylglycerol biosynthetic process, cardiolipin biosynthetic process,
	398	SACM1L	Q9NTJ5	Phosphatidylinositide phosphatase SAC1 [OS=Homo sapiens]	no	no	Yes	21	6	13	-		-	phosphatidylinositol biosynthetic process, phosphatidylinositol dephosphorylation,
	399	PRELID1	Q9Y255	PRELI domain-containing protein 1, mitochondrial [OS=Homo sapiens]	no	no	Yes	16	1	11	-		-	apoptotic process, immune response, multicellular organism development, negative regulation of mitochondrial membrane potential, positive regulation of endopeptidase activity, phospholipid transport, regulation of apoptotic process, negative regulation of apoptotic process, regulation of T cell differentiation, regulation of mitochondrial membrane potential, positive regulation of T cell apoptoti…
	400	DHTKD1	Q96HY7	Probable 2-oxoglutarate dehydrogenase E1 component DHKTD1, mitochondrial [OS=Homo sapiens]	Yes	no	Yes	27	27	14	-		-	Glycolysis; tricarboxylic acid cycle
	401	RARS2	Q5T160	probable arginine--tRNA ligase, mitochondrial [OS=Homo sapiens]	Yes	no	Yes	25	22	15	-		-	Mitochondrial tRNA aminoacylation
	402	NARS2	Q96I59	probable asparagine--tRNA ligase, mitochondrial [OS=Homo sapiens]	no	no	Yes	19	7	8	-		-	tRNA aminoacylation for protein translation, asparaginyl-tRNA aminoacylation,
	403	CARS2	Q9HA77	probable cysteine--tRNA ligase, mitochondrial [OS=Homo sapiens]	no	no	Yes	17	14	17	-		-	tRNA aminoacylation for protein translation, cysteinyl-tRNA aminoacylation,
	404	LDHD	Q86WU2	Probable D-lactate dehydrogenase, mitochondrial [OS=Homo sapiens]	Yes	no	Yes	19	17	15	-		-	lactate catabolic process
	405	C12orf65	Q9H3J6-1	Probable peptide chain release factor C12orf65, mitochondrial [OS=Homo sapiens]	no	no	Yes	21	3	28	-		-	mitochondrial translational termination, rescue of stalled ribosome,
	406	PARS2	Q7L3T8	probable proline--tRNA ligase, mitochondrial [OS=Homo sapiens]	no	no	Yes	14	11	14	-		-	prolyl-tRNA aminoacylation,
	407	OSGEPL1	Q9H4B0	Probable tRNA N6-adenosine threonylcarbamoyltransferase, mitochondrial [OS=Homo sapiens]	no	no	Yes	14	3	7	-		-	tRNA threonylcarbamoyladenosine modification, proteolysis,
	408	PLOD1	Q02809	Procollagen-lysine,2-oxoglutarate 5-dioxygenase 1 [OS=Homo sapiens]	no	no	Yes	22	22	9	-		-	response to hypoxia, cellular protein modification process, epidermis development, hydroxylysine biosynthetic process,GO:0055114~oxidation-reduction process,
	409	PRODH	O43272	Proline dehydrogenase 1, mitochondrial [OS=Homo sapiens]	no	no	Yes	23	5	12	-		-	proline metabolic process, proline catabolic process, intrinsic apoptotic signaling pathway in response to oxidative stress, proline catabolic process to glutamate, positive regulation of cell death, 4-hydroxyproline catabolic process, oxidation-reduction process,
	410	PCCB	P05166-1	propionyl-CoA carboxylase beta chain, mitochondrial [OS=Homo sapiens]	no	no	Yes	24	7	11	-		-	fatty acid biosynthetic process, biotin metabolic process, short-chain fatty acid catabolic process,
	411	FAM161B	Q96MY7	Protein FAM161B [OS=Homo sapiens]	no	no	Yes	13	12	7	-		-	cilium organization
	412	FAM210B	Q96KR6	Protein FAM210B, mitochondrial [OS=Homo sapiens]	no	no	Yes	18	14	30	-		-	cellular response to estradiol stimulus
	413	GDF5-AS1	Q5U4N7	Protein GDF5OS, mitochondrial [OS=Homo sapiens]	no	no	Yes	18	4	9	-		-	mitochondrial protein
	414	MTO1	Q9Y2Z2	Protein MTO1 homolog, mitochondrial [OS=Homo sapiens]	no	no	Yes	10	9	16	-		-	tRNA processing, tRNA methylation, oxidation-reduction process, mitochondrial tRNA wobble uridine modification,
	415	PYURF	Q96I23	Protein preY, mitochondrial [OS=Homo sapiens]	no	no	Yes	14	1	32	-		-	GPI anchor biosynthetic process, positive regulation of metabolic process, peptidyl-glutamine methylation, tRNA methylation, rRNA (guanine-N7)-methylation,
	416	SCO1	O75880	Protein SCO1 homolog, mitochondrial [OS=Homo sapiens]	Yes	Yes	Yes	22	13	17	-		-	Electron Transport Chain; Copper homeostasis
	417	SCO2	O43819	Protein SCO2 homolog, mitochondrial [OS=Homo sapiens]	no	no	Yes	19	6	28	-		-	eye development, in utero embryonic development, muscle system process, copper ion transport, cellular copper ion homeostasis, respiratory chain complex IV assembly, response to activity, respiratory electron transport chain, cell redox homeostasis, oxidation-reduction process,
	418	PCDHGB2	Q9Y5G2-1	Protocadherin gamma-B2 [OS=Homo sapiens]	no	no	Yes	15	7	7	-		-	homophilic cell adhesion via plasma membrane adhesion molecules,
	419	COX10	Q12887	Protoheme IX farnesyltransferase, mitochondrial [OS=Homo sapiens]	no	no	Yes	12	6	13	-		-	mitochondrial fission, mitochondrial electron transport, cytochrome c to oxygen, heme biosynthetic process, heme a biosynthetic process, respiratory chain complex IV assembly, aerobic respiration, cellular respiration, heme O biosynthetic process hydrogen ion transmembrane transport,
	420	GOLGA6L3	A6NEY3	Putative golgin subfamily A member 6-like protein 3 [OS=Homo sapiens]	no	no	Yes	4	4	6	-		-	Could be the product of a pseudogene
	421	TIMM23B	Q5SRD1	Putative mitochondrial import inner membrane translocase subunit Tim23B [OS=Homo sapiens]	no	no	Yes	31	5	35	-		-	protein import into mitochondrial matrix,
	422	RBFA	Q8N0V3-1	Putative ribosome-binding factor A, mitochondrial [OS=Homo sapiens]	no	no	Yes	11	8	10	-		-	rRNA processing,
	423	PDHA1	P08559	Pyruvate dehydrogenase E1 component subunit alpha, somatic form, mitochondrial [OS=Homo sapiens]	no	no	Yes	10	2	9	-		-	glucose metabolic process, acetyl-CoA biosynthetic process from pyruvate, pyruvate metabolic process, tricarboxylic acid cycle, regulation of acetyl-CoA biosynthetic process from pyruvate, glyoxylate metabolic process, mitochondrial acetyl-CoA biosynthetic process from pyruvate,
	424	PDHA2	P29803	Pyruvate dehydrogenase E1 component subunit alpha, testis-specific form, mitochondrial [OS=Homo sapiens]	no	no	Yes	9	9	17	-		-	glucose metabolic process, acetyl-CoA biosynthetic process from pyruvate, pyruvate metabolic process, tricarboxylic acid cycle,
	425	PDHB	P11177	Pyruvate dehydrogenase E1 component subunit beta, mitochondrial [OS=Homo sapiens]	Yes	no	Yes	14	4	11	-		-	Glycolysis and Gluconeogenesis; Tricarboxylic acid cycle
	426	QTRT2	Q9H974-1	Queuine tRNA-ribosyltransferase accessory subunit 2 [OS=Homo sapiens]	no	no	Yes	4	4	5	-		-	tRNA modification, queuosine biosynthetic process,
	427	RSAD1	Q9HA92	Radical S-adenosyl methionine domain-containing protein 1, mitochondrial [OS=Homo sapiens]	no	Yes	Yes	16	9	11	-		-	porphyrin-containing compound biosynthetic process, oxidation-reduction process,
	428	ARHGAP39	Q9C0H5	Rho GTPase-activating protein 39 [OS=Homo sapiens]	no	no	Yes	15	19	9	-		-	signal transduction, positive regulation of GTPase activity, regulation of small GTPase mediated signal transduction,
	429	PRPS1	P60891	ribose-phosphate pyrophosphokinase 1 [OS=Homo sapiens]	no	no	Yes	13	11	18	-		-	5-phosphoribose 1-diphosphate biosynthetic process, purine nucleobase metabolic process, purine nucleotide biosynthetic process, AMP biosynthetic process, pyrimidine nucleotide biosynthetic process, ervous system development, nucleoside metabolic process, ribonucleoside monophosphate biosynthetic process, nucleotide biosynthetic process, phosphorylation, organ regeneration, urate biosynthetic pro…
	430	MRRF	Q96E11	Ribosome-recycling factor, mitochondrial [OS=Homo sapiens]	no	no	Yes	56	9	19	-		-	translation, ribosome disassembly, mitochondrial translational termination,
	431	GFM2	Q969S9	Ribosome-releasing factor 2, mitochondrial [OS=Homo sapiens]	no	no	Yes	13	13	12	-		-	mitochondrial translation, ribosome disassembly, mitochondrial translational elongation, mitochondrial translational termination,
	432	MEX3C	Q5U5Q3	RNA-binding E3 ubiquitin-protein ligase MEX3C [OS=Homo sapiens]	no	no	Yes	11	6	10	-		-	chondrocyte hypertrophy, regulation of fat cell differentiation, energy homeostasis,
	433	RTTN	Q86VV8	Rotatin [OS=Homo sapiens]	no	no	Yes	54	53	10	-		-	determination of left/right symmetry, cilium organization,
	434	MRM1	Q6IN84-1	rRNA methyltransferase 1, mitochondrial [OS=Homo sapiens]	no	no	Yes	19	8	15	-		-	enzyme-directed rRNA 2'-O-methylation, RNA processing,
	435	MRM2	Q9UI43	rRNA methyltransferase 2, mitochondrial [OS=Homo sapiens]	no	no	Yes	17	1	9	-		-	enzyme-directed rRNA 2'-O-methylation, RNA methylation, rRNA processing, cell proliferation, rRNA methylation,
	436	SLC25A26	Q70HW3	S-adenosylmethionine mitochondrial carrier protein [OS=Homo sapiens]	no	no	Yes	5	1	11	-		-	translation, transport, ion transport, S-adenosyl-L-methionine transport, S-adenosyl-L-methionine transmembrane transport,
	437	LACTB	P83111-1	Serine beta-lactamase-like protein LACTB, mitochondrial [OS=Homo sapiens]	no	no	Yes	20	10	18	-		-	lipid metabolic process; proteolysis; regulation of lipid metabolic process
	438	SHMT2	P34897-1	Serine hydroxymethyltransferase, mitochondrial [OS=Homo sapiens]	no	Yes	Yes	46	5	15	-		-	glycine metabolic process, L-serine metabolic process, L-serine biosynthetic process, one-carbon metabolic process, positive regulation of cell proliferation, glycine biosynthetic process from serine, response to type I interferon, tetrahydrofolate interconversion, tetrahydrofolate metabolic process, folic acid metabolic process, protein tetramerization, protein homotetramerization, protein K63-l…
	439	SARS2	Q9NP81-1	Serine--tRNA ligase, mitochondrial [OS=Homo sapiens]	no	no	Yes	39	5	11	-		-	tRNA aminoacylation for protein translation, seryl-tRNA aminoacylation, selenocysteinyl-tRNA(Sec) biosynthetic process,
	440	STMP1	E0CX11	Short transmembrane mitochondrial protein 1 [OS=Homo sapiens]	no	no	Yes	4	3	74	-		-	innate immune response; positive regulation of interleukin-1 beta secretion; positive regulation of NLRP3 inflammasome complex assembly
	441	ACADS	P16219	Short-chain specific acyl-CoA dehydrogenase, mitochondrial [OS=Homo sapiens]	no	no	Yes	12	11	18	-		-	fatty acid beta-oxidation,fatty acid beta-oxidation using acyl-CoA dehydrogenase, butyrate catabolic process, lipid homeostasis,
	442	SSBP1	Q04837	Single-stranded DNA-binding protein, mitochondrial [OS=Homo sapiens]	Yes	Yes	Yes	11	5	24	-		-	mitochondrial DNA replication
	443	SPATA19	Q7Z5L4	Spermatogenesis-associated protein 19, mitochondrial [OS=Homo sapiens]	no	no	Yes	21	3	29	-		-	multicellular organism development, spermatogenesis, cell differentiation,
	444	U2AF2	P26368	Splicing factor U2AF 65 kDa subunit [OS=Homo sapiens]	no	no	Yes	6	4	8	-		-	mRNA splicing, via spliceosome, termination of RNA polymerase II transcription, mRNA processing, RNA export from nucleus, mRNA export from nucleus, mRNA 3'-end processing, positive regulation of RNA splicing, negative regulation of mRNA splicing, via spliceosome, regulation of mitophagy, positive regulation of protein targeting to mitochondrion,
	445	STARD7	Q9NQZ5	StAR-related lipid transfer protein 7, mitochondrial [OS=Homo sapiens]	no	no	Yes	19	13	16	-		-	phospholipid transport, positive regulation of protein targeting to mitochondrion,
	446	STAR	P49675	Steroidogenic acute regulatory protein, mitochondrial [OS=Homo sapiens]	no	no	Yes	16	4	11	-		-	steroid biosynthetic process, bile acid biosynthetic process, C21-steroid hormone biosynthetic process, estrogen biosynthetic process, brain development, response to nutrient, cholesterol metabolic process, glucocorticoid metabolic process, male gonad development, response to herbicide, response to ionizing radiation, response to lead ion, positive regulation of gene expression, response to activ…
	447	STOML2	Q9UJZ1	Stomatin-like protein 2, mitochondrial [OS=Homo sapiens]	Yes	no	Yes	27	9	19	-		-	Regulator of Biogenesis and activity of mitochondria
	448	SDHC	Q99643	Succinate dehydrogenase cytochrome b560 subunit, mitochondrial [OS=Homo sapiens]	no	Yes	Yes	22	3	19	-		-	tricarboxylic acid cycle, mitochondrial electron transport, succinate to ubiquinone, erobic respiration, oxidation-reduction process,
	449	SUCLG2	Q96I99-1	Succinate--CoA ligase [GDP-forming] subunit beta, mitochondrial [OS=Homo sapiens]	no	no	Yes	13	13	14	-		-	tricarboxylic acid cycle, succinyl-CoA metabolic process, succinate metabolic process, metabolic process,
	450	OXCT2	Q9BYC2	Succinyl-CoA:3-ketoacid coenzyme A transferase 2, mitochondrial [OS=Homo sapiens]	no	no	Yes	16	20	22	-		-	metabolic process, ketone body catabolic process,
	451	TCAIM	Q8N3R3	T-cell activation inhibitor, mitochondrial [OS=Homo sapiens]	no	no	Yes	36	20	17	-		-	may regulate T-cell apoptosis
	452	TTC19	Q6DKK2	tetratricopeptide repeat protein 19, mitochondrial [OS=Homo sapiens]	no	no	Yes	20	9	15	-		-	cytokinesis, mitochondrial respiratory chain complex III assembly,
	453	TXN2	Q99757	Thioredoxin, mitochondrial [OS=Homo sapiens]	no	no	Yes	23	9	33	-		-	sulfate assimilation, response to reactive oxygen species, response to hypoxia, protein folding, glycerol ether metabolic process, response to nutrient, response to hormone, response to glucose, response to organic cyclic compound, cellular response to nutrient levels, cellular response to oxidative stress, response to drug, cell redox homeostasis, response to axon injury, oxidation-reduction pro…
	454	PRDX3	P30048	Thioredoxin-dependent peroxide reductase, mitochondrial [OS=Homo sapiens]	Yes	no	Yes	4	3	21	-		-	cell redox homeostasis; negative regulation of apoptotic process; response to hydrogen peroxide; response to lipopolysaccharide; response to oxidative stress
	455	TARS2	Q9BW92	Threonine--tRNA ligase, mitochondrial [OS=Homo sapiens]	Yes	no	Yes	6	5	10	-		-	Mitochondrial tRNA aminoacylation; Protein biosynthesis
	456	TEFM	Q96QE5	Transcription elongation factor, mitochondrial [OS=Homo sapiens]	no	no	Yes	25	4	11	-		-	oxidative phosphorylation, mitochondrial DNA replication, regulation of transcription, DNA-templated, transcription from mitochondrial promoter,
	457	TAGLN3	Q9UI15	Transgelin-3 [OS=Homo sapiens]	no	no	Yes	15	3	28	-		-	negative regulation of transcription from RNA polymerase II promoter, central nervous system development,
	458	GUF1	Q8N442	translation factor GUF1, mitochondrial [OS=Homo sapiens]	no	Yes	Yes	13	6	10	-		-	translation, positive regulation of translation,
	459	MTIF3	Q9H2K0	translation initiation factor IF-3, mitochondrial [OS=Homo sapiens]	no	no	Yes	19	4	14	-		-	ribosome disassembly, mitochondrial translational initiation,
	460	TMEM267	Q0VDI3	Transmembrane protein 267 [OS=Homo sapiens]	no	no	Yes	5	3	22	-		-	Transmembrane protein
	461	NSUN3	Q9H649	tRNA (cytosine(34)-C(5))-methyltransferase, mitochondrial [OS=Homo sapiens]	no	no	Yes	7	1	10	-		-	rRNA methylation,
	462	YARS2	Q9Y2Z4	Tyrosine--tRNA ligase, mitochondrial [OS=Homo sapiens]	Yes	no	Yes	13	4	10	-		-	Protein biosynthesis
	463	COQ6	Q9Y2Z9-1	Ubiquinone biosynthesis monooxygenase COQ6, mitochondrial [OS=Homo sapiens]	no	no	Yes	18	4	7	-		-	ubiquinone biosynthetic process, secondary metabolite biosynthetic process, oxidation-reduction process,
	464	COQ3	Q9NZJ6	Ubiquinone biosynthesis O-methyltransferase, mitochondrial [OS=Homo sapiens]	no	no	Yes	11	2	8	-		-	glycerol metabolic process, ubiquinone biosynthetic process, regulation of ubiquinone biosynthetic process, methylation,
	465	COQ9	O75208-1	Ubiquinone biosynthesis protein COQ9, mitochondrial [OS=Homo sapiens]	no	no	Yes	12	2	10	-		-	mitochondrial electron transport, NADH to ubiquinone, ubiquinone biosynthetic process,
	466	CMPK2	Q5EBM0-1	UMP-CMP kinase 2, mitochondrial [OS=Homo sapiens]	no	no	Yes	14	5	9	-		-	nucleoside diphosphate phosphorylation, dUDP biosynthetic process, dTDP biosynthetic process, dTTP biosynthetic process, nucleoside triphosphate biosynthetic process, cellular response to lipopolysaccharide,
	467	UTS2	O95399	Urotensin-2 [OS=Homo sapiens]	no	no	Yes	13	4	22	-		-	response to hypoxia, negative regulation of glomerular filtration, muscle contraction, positive regulation of cytosolic calcium ion concentration, chemical synaptic transmission, regulation of blood pressure, negative regulation of heart rate, positive regulation of heart rate, positive regulation of fibroblast migration, positive regulation of circadian sleep/wake cycle, wakefulness, positive re…
	468	WDR31	Q8NA23	WD repeat-containing protein 31 [OS=Homo sapiens]	no	no	Yes	14	5	16	-		-	WD repeat-containing protein
	469	ZCCHC3	Q9NUD5	Zinc finger CCHC domain-containing protein 3 [OS=Homo sapiens]	no	no	Yes	17	17	20	-		-	activation of innate immune response, cellular response to exogenous dsRNA, defense response to virus, detection of virus, innate immune response, positive regulation of RIG-I signaling pathway, positive regulation of type I interferon production
	470	SLC39A13	Q96H72	zinc transporter ZIP13 [OS=Homo sapiens]	no	no	Yes	12	12	18	-		-	cellular zinc ion homeostasis, connective tissue development, zinc II ion transmembrane transport,
	471	MRPL9	Q9BYD2	39S ribosomal protein L9, mitochondrial [OS=Homo sapiens]	Yes	no	Yes	-	-	-	4	4	19	Mitochondrial translation initiation; Mitochondrial translation elongation; Mitochondrial translation termination
	472	ACSF3	Q4G176	Acyl-CoA synthetase family member 3, mitochondrial [OS=Homo sapiens]	Yes	no	Yes	-	-	-	7	7	11	Fatty acid metabolism, Lipid metabolism
	473	ALDH1B1	P30837	Aldehyde dehydrogenase X, mitochondrial [OS=Homo sapiens]	no	no	Yes	-	-	-	5	5	9	carbohydrate metabolic process, ethanol catabolic process, ethanol oxidation,
	474	UQCRC1	P31930	Cytochrome b-c1 complex subunit 1, mitochondrial [OS=Homo sapiens]	Yes	Yes	Yes	-	-	-	9	9	12	Electron Transport Chain
	475	DAP3	P51398-2	Isoform 2 of 28S ribosomal protein S29, mitochondrial [OS=Homo sapiens]	no	no	Yes	-	-	-	3	3	14	apoptotic process, mitochondrial translational elongation, mitochondrial translational termination, apoptotic signaling pathway,
	476	OGDH	Q02218-2	Isoform 2 of 2-oxoglutarate dehydrogenase, mitochondrial [OS=Homo sapiens]	no	no	Yes	-	-	-	3	2	5	generation of precursor metabolites and energy, glycolytic process, tricarboxylic acid cycle, 2-oxoglutarate metabolic process, succinyl-CoA metabolic process, lysine catabolic process,GO:0006734~NADH metabolic process, cerebellar cortex development, striatum development, hippocampus development, thalamus development, pyramidal neuron development, tangential migration from the subventricular zone…
	477	ACSM1	Q08AH1-2	Isoform 2 of Acyl-coenzyme A synthetase ACSM1, mitochondrial [OS=Homo sapiens]	no	no	Yes	-	-	-	3	3	31	fatty acid biosynthetic process, acyl-CoA metabolic process, xenobiotic metabolic process, metabolic process, energy derivation by oxidation of organic compounds, benzoate metabolic process, fatty acid oxidation, butyrate metabolic process, cholesterol homeostasis,
	478	AGXT2	Q9BYV1-2	Isoform 2 of Alanine--glyoxylate aminotransferase 2, mitochondrial [OS=Homo sapiens]	no	no	Yes	-	-	-	4	4	16	glyoxylate catabolic process, glycine biosynthetic process, by transamination of glyoxylate, L-alanine catabolic process, by transamination, positive regulation of nitric oxide biosynthetic process, glyoxylate metabolic process,
	479	SLC25A14	O95258-2	Isoform 2 of Brain mitochondrial carrier protein 1 [OS=Homo sapiens]	no	Yes	Yes	-	-	-	3	3	26	translation, transport, mitochondrial transport, aerobic respiration, proton transport,
	480	COQ10A	Q96MF6-2	Isoform 2 of Coenzyme Q-binding protein COQ10 homolog A, mitochondrial [OS=Homo sapiens]	no	no	Yes	-	-	-	7	4	26	ubiquinone biosynthetic process, cellular respiration,
	481	FASTKD1	Q53R41-2	Isoform 2 of FAST kinase domain-containing protein 1, mitochondrial [OS=Homo sapiens]	no	Yes	Yes	-	-	-	3	3	10	protein phosphorylation, cellular respiration,
	482	FASTKD2	Q9NYY8-2	Isoform 2 of FAST kinase domain-containing protein 2, mitochondrial [OS=Homo sapiens]	no	no	Yes	-	-	-	5	5	16	protein phosphorylation, cellular respiration, mitochondrial large ribosomal subunit assembly,
	483	FECH	P22830-2	Isoform 2 of Ferrochelatase, mitochondrial [OS=Homo sapiens]	Yes	no	Yes	-	-	-	4	4	16	heme biosynthetic process; porphyrin biosynthesis; response to dexamethasone stimulus, arsenic-containing substance, ethanol, insecticide, lead ion, methylmercury, platinum ion
	484	TRAP1	Q12931-2	Isoform 2 of Heat shock protein 75 kDa, mitochondrial [OS=Homo sapiens]	no	no	Yes	-	-	-	3	3	12	protein folding, response to stress, translational attenuation, chaperone-mediated protein folding, negative regulation of cellular respiration, negative regulation of reactive oxygen species biosynthetic process, negative regulation of intrinsic apoptotic signaling pathway in response to hydrogen peroxide,
	485	NDUFS1	P28331-2	Isoform 2 of NADH-ubiquinone oxidoreductase 75 kDa subunit, mitochondrial [OS=Homo sapiens]	Yes	no	Yes	-	-	-	3	3	7	mitochondrial respiratory chain complex I assembly; apoptotic mitochondrial changes
	486	MTPAP	Q9NVV4-2	Isoform 2 of Poly(A) RNA polymerase, mitochondrial [OS=Homo sapiens]	no	no	Yes	-	-	-	5	5	6	transcription, DNA-templated, mRNA polyadenylation, histone mRNA catabolic process,
	487	SARDH	Q9UL12-2	Isoform 2 of Sarcosine dehydrogenase, mitochondrial [OS=Homo sapiens]	no	no	Yes	-	-	-	3	3	7	choline catabolic process, oxidation-reduction process,
	488	SDHA	P31040-2	Isoform 2 of Succinate dehydrogenase [ubiquinone] flavoprotein subunit, mitochondrial [OS=Homo sapiens]	no	Yes	Yes	-	-	-	3	3	17	tricarboxylic acid cycle, succinate metabolic process, mitochondrial electron transport, succinate to ubiquinone, nervous system development, anaerobic respiration, electron transport chain, respiratory electron transport chain oxidation-reduction process,
	489	SUCLA2	Q9P2R7-2	Isoform 2 of Succinate--CoA ligase [ADP-forming] subunit beta, mitochondrial [OS=Homo sapiens]	no	no	Yes	-	-	-	4	4	17	tricarboxylic acid cycle, succinyl-CoA metabolic process, succinate metabolic process, succinyl-CoA pathway, metabolic process,
	490	CYP24A1	Q07973-3	Isoform 3 of 1,25-dihydroxyvitamin D(3) 24-hydroxylase, mitochondrial [OS=Homo sapiens]	no	no	Yes	-	-	-	4	4	12	osteoblast differentiation, vitamin metabolic process, response to vitamin D, vitamin D metabolic process, vitamin D catabolic process, oxidation-reduction process, vitamin D receptor signaling pathway,
	491	COQ10A	Q96MF6-3	Isoform 3 of Coenzyme Q-binding protein COQ10 homolog A, mitochondrial [OS=Homo sapiens]	no	no	Yes	-	-	-	3	0	18	ubiquinone biosynthetic process, cellular respiration,
	492	OPA1	O60313-9	Isoform 3 of Dynamin-like 120 kDa protein, mitochondrial [OS=Homo sapiens]	no	no	Yes	-	-	-	4	4	4	mitochondrial genome maintenance, mitochondrial fission, dynamin polymerization involved in mitochondrial fission, apoptotic process, mitochondrion organization, inner mitochondrial membrane organization, aging, visual perception, mitochondrial fusion, positive regulation of mitochondrial fusion, positive regulation of neuron maturation, axonal transport of mitochondrion, negative regulation of r…
	493	MSRA	Q9UJ68-4	Isoform 4 of Mitochondrial peptide methionine sulfoxide reductase [OS=Homo sapiens]	no	no	Yes	-	-	-	4	3	32	cellular protein modification process, methionine metabolic process, response to oxidative stress, protein repair, oxidation-reduction process,
	494	EXOG	Q9Y2C4-4	Isoform 4 of Nuclease EXOG, mitochondrial [OS=Homo sapiens]	no	no	Yes	-	-	-	3	3	6	nucleic acid phosphodiester bond hydrolysis,
	495	ENOSF1	Q7L5Y1-5	Isoform 5 of Mitochondrial enolase superfamily member 1 [OS=Homo sapiens]	no	no	Yes	-	-	-	3	3	12	metabolic process, cellular amino acid catabolic process, cellular carbohydrate catabolic process,
	496	ALDH6A1	Q02252	Methylmalonate-semialdehyde dehydrogenase [acylating], mitochondrial [OS=Homo sapiens]	Yes	Yes	Yes	-	-	-	6	6	9	Branched-chain amino acid catabolism
	497	NUDT6	P53370	Nucleoside diphosphate-linked moiety X motif 6 [OS=Homo sapiens]	Yes	no	Yes	-	-	-	4	4	12	regulation of cell cycle
	498	OXCT1	P55809	Succinyl-CoA:3-ketoacid coenzyme A transferase 1, mitochondrial [OS=Homo sapiens]	Yes	no	Yes	-	-	-	7	5	22	Synthesis and Degradation of Ketone Bodies
