# Supplementary figures and images for: Mitochondrial O-GlcNAc Transferase Interacts with and Modifies Many Proteins and Its Up-Regulation Affects Mitochondrial Function and Cellular Energy Homeostasis
Source: MDPI journal article supplement (doi:10.3390/cancers13122956), 2021-06-12

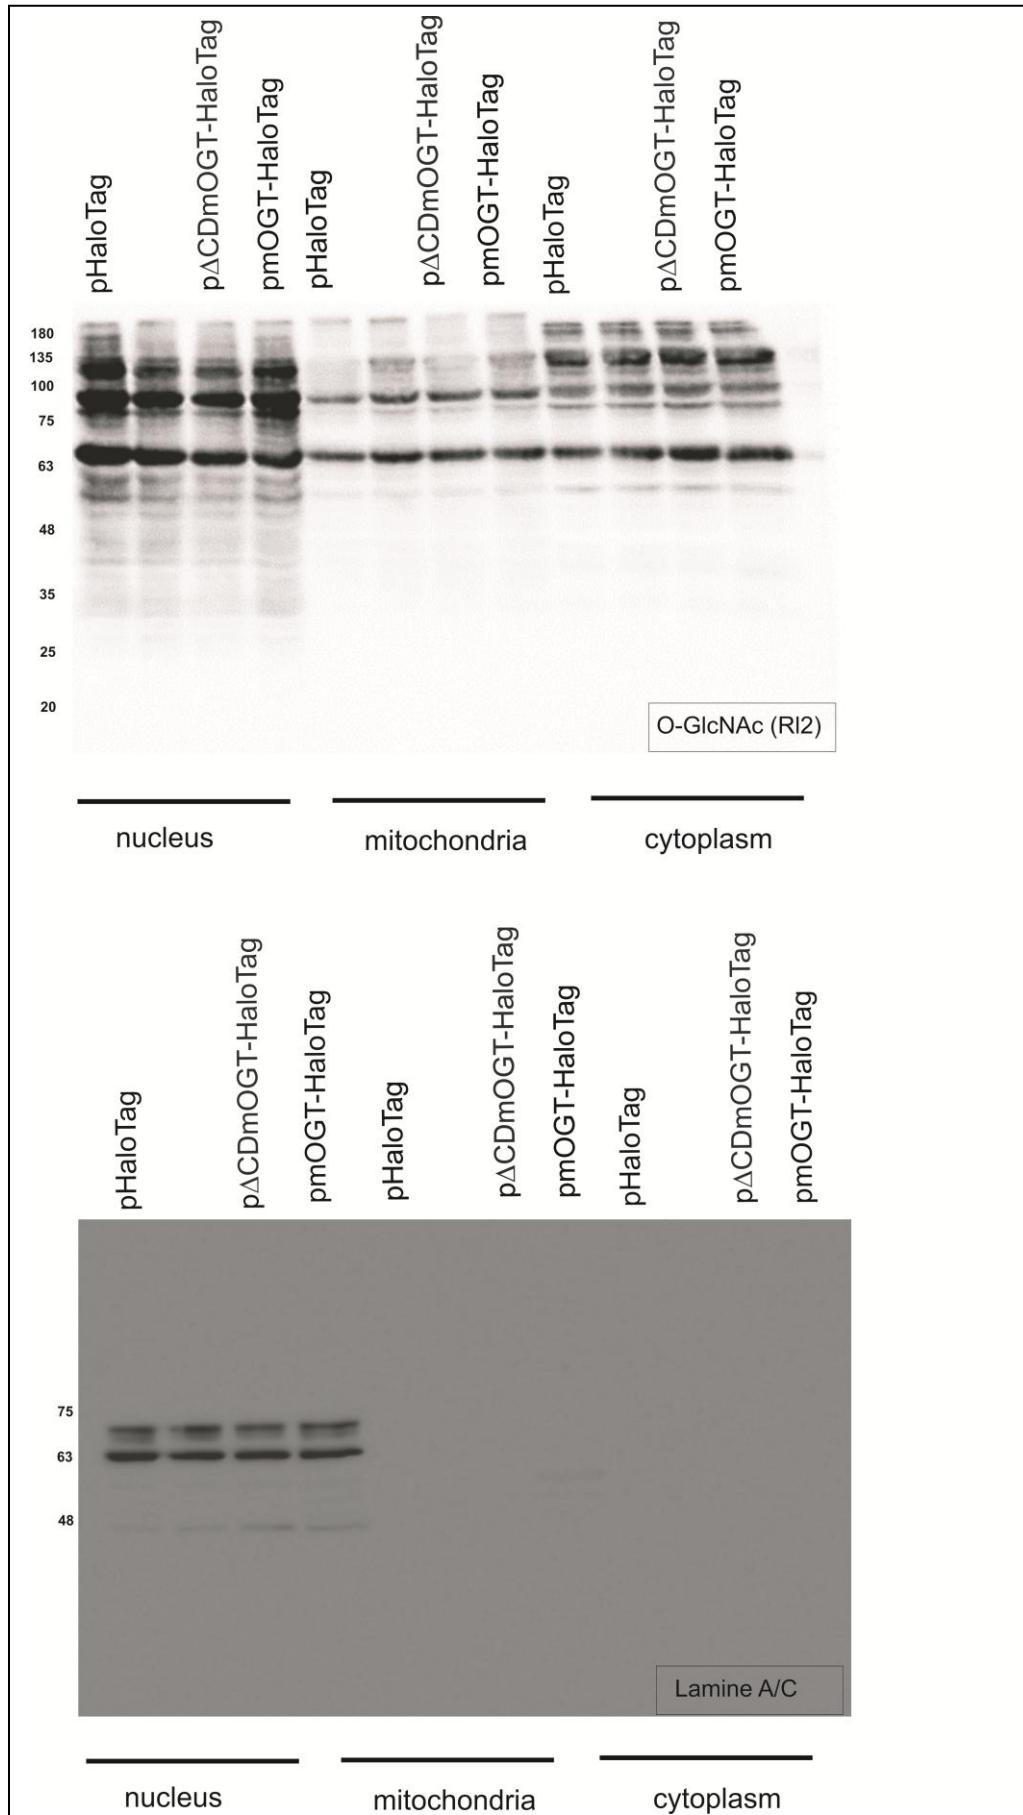

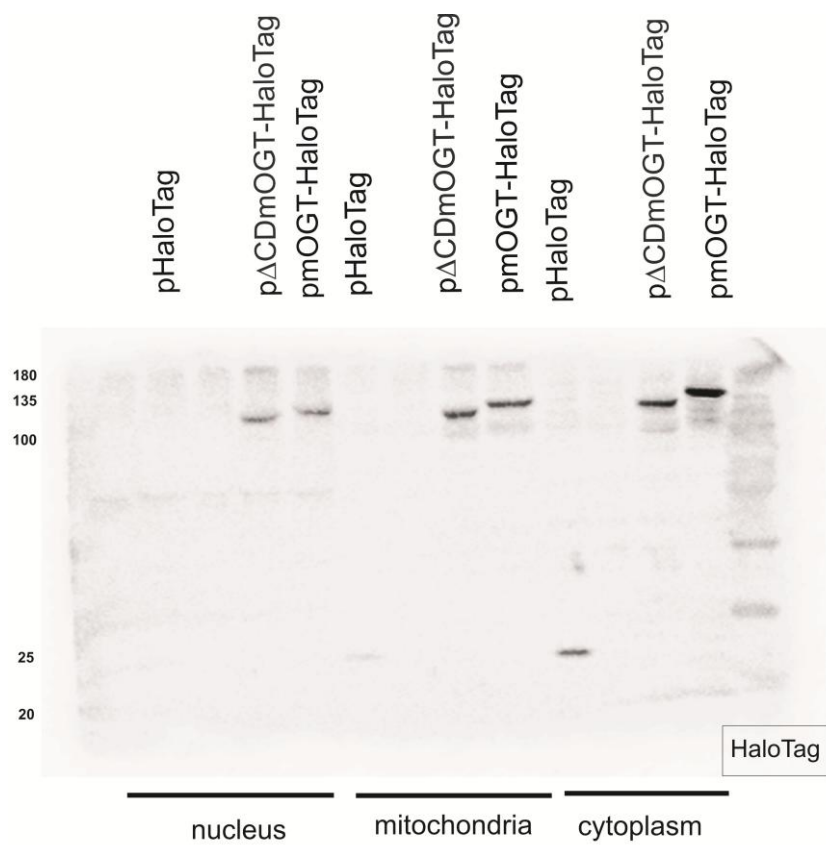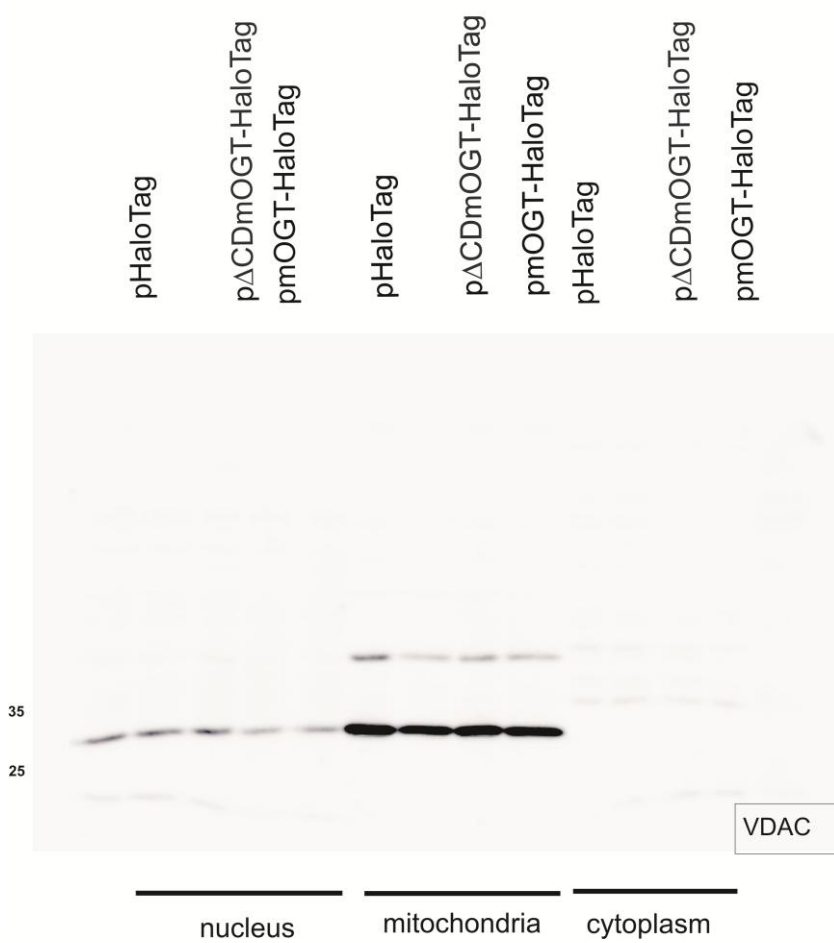

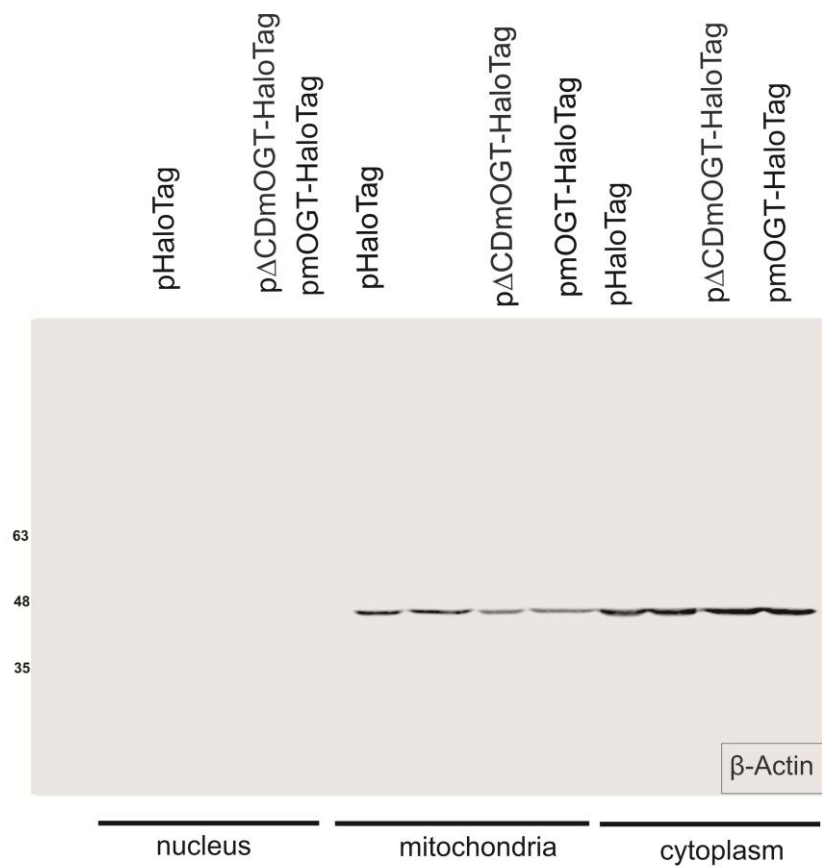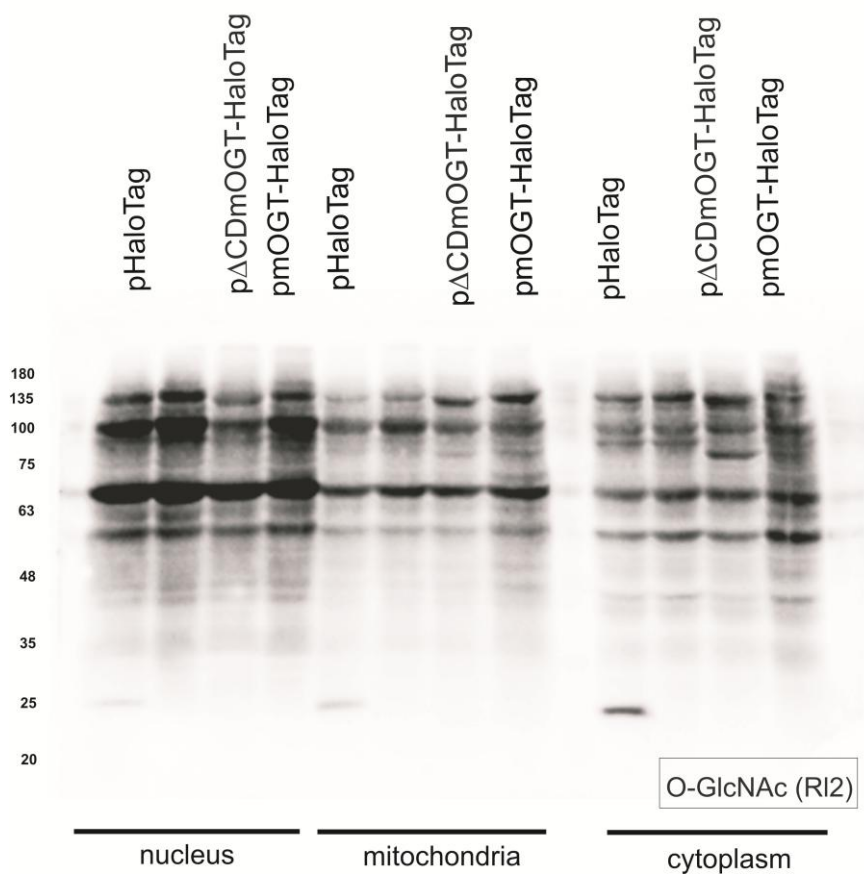

Hs578t

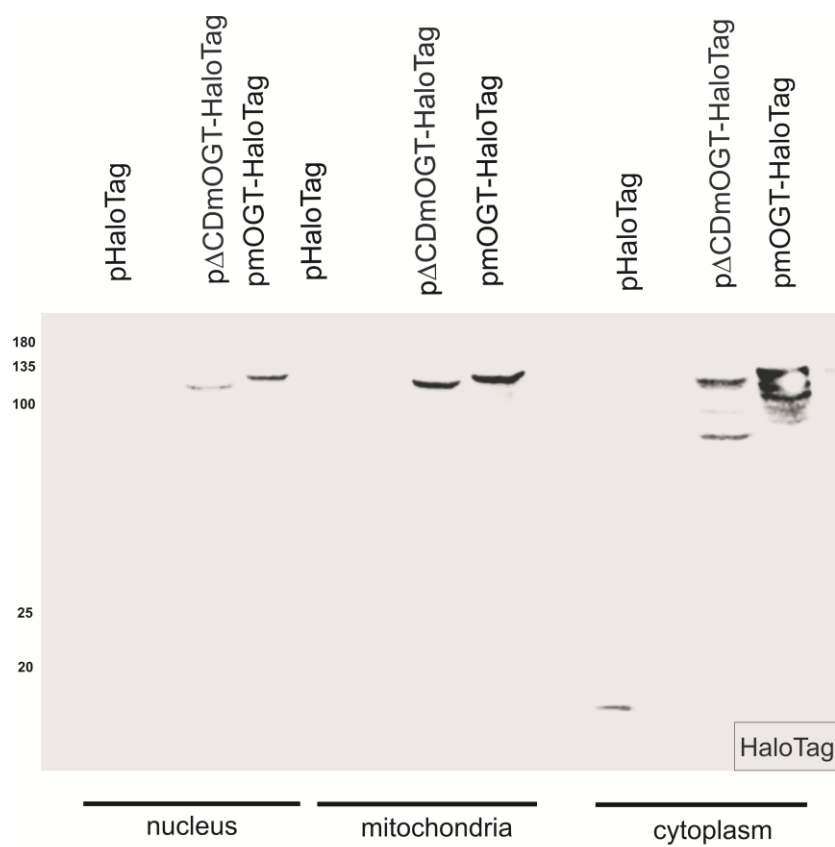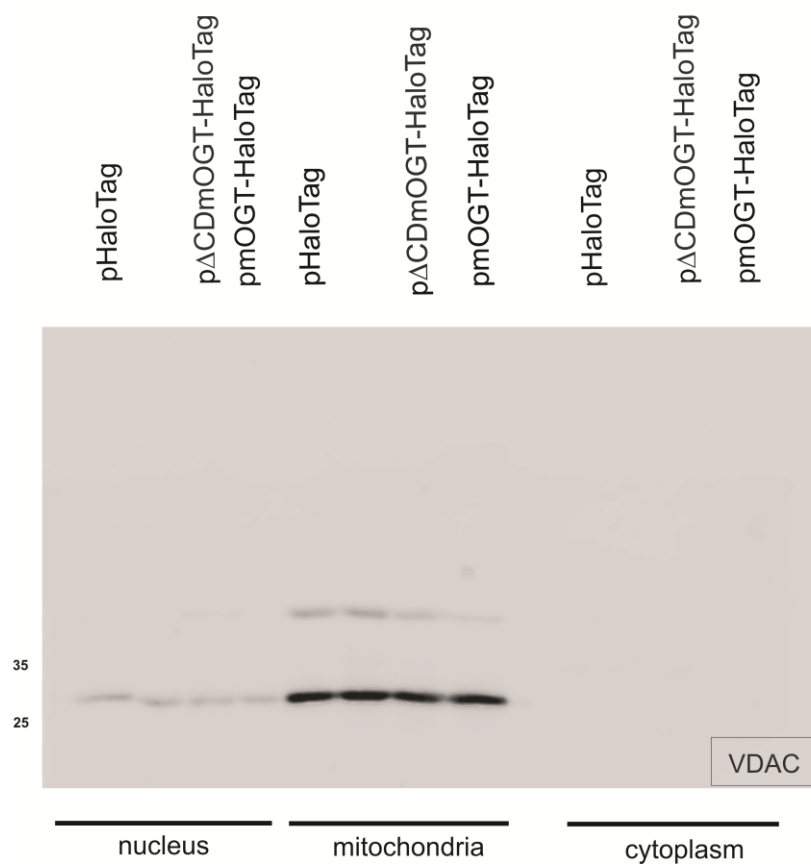

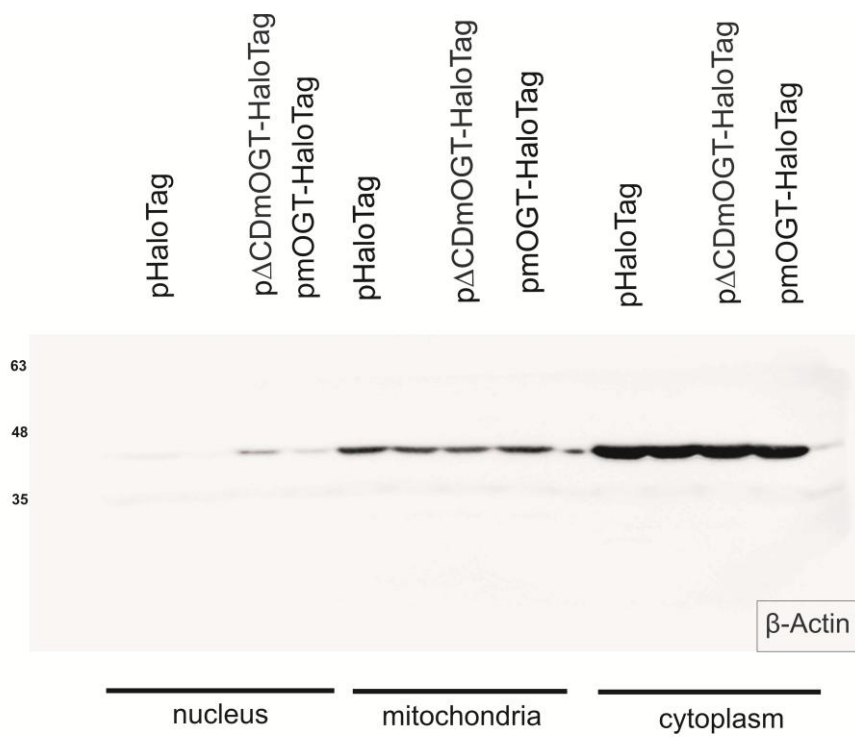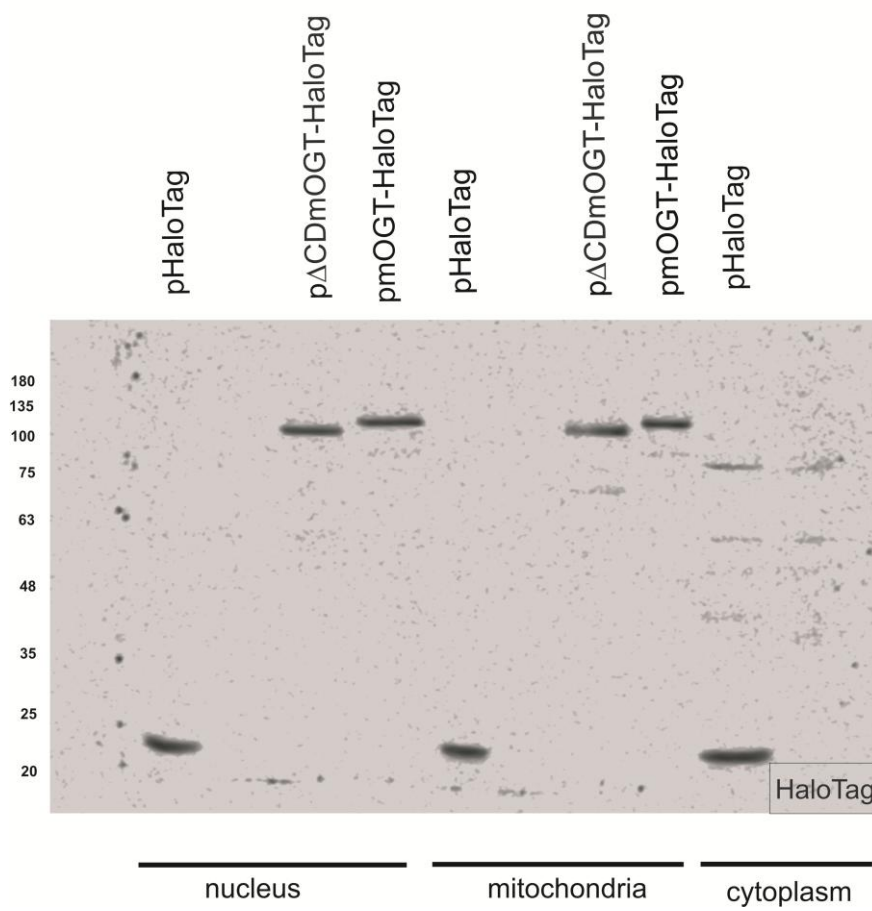

MCF-7

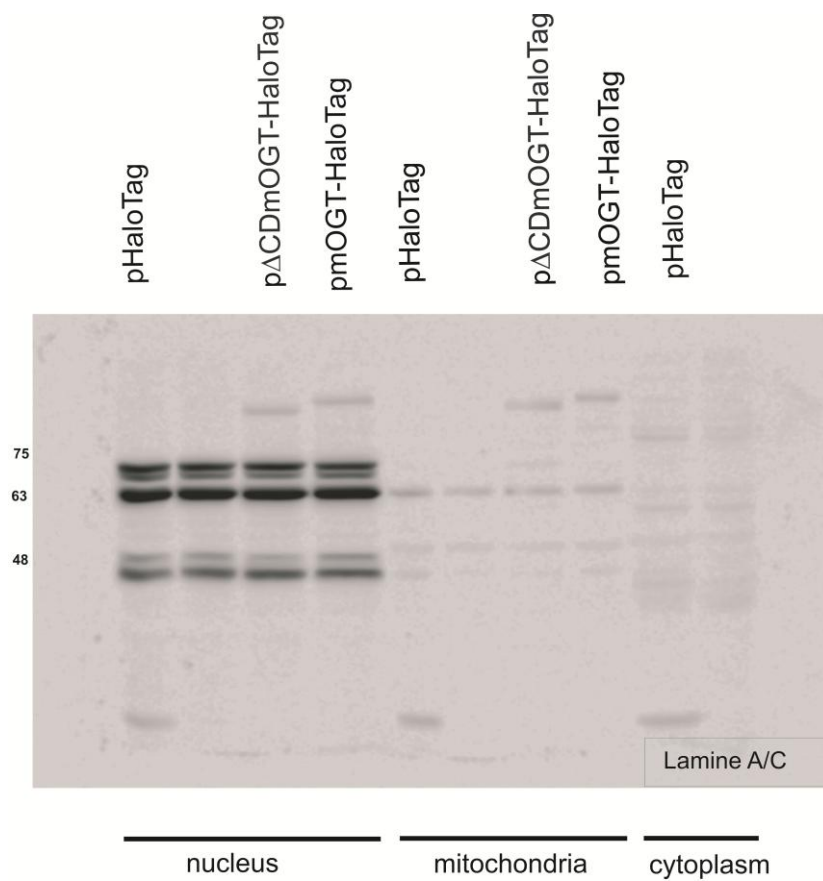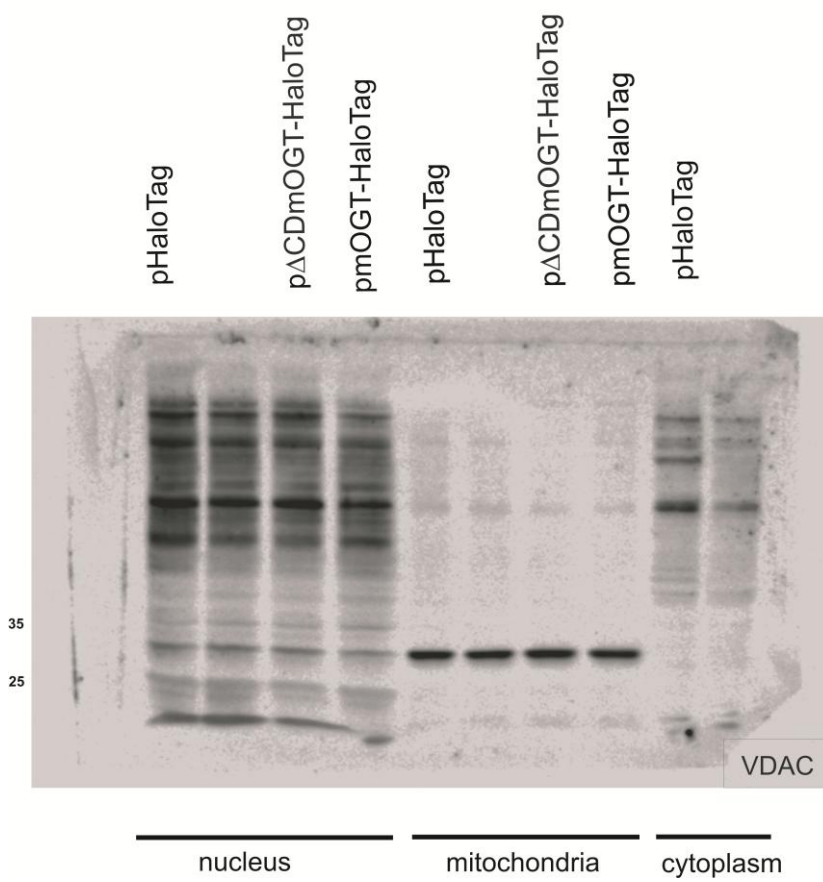

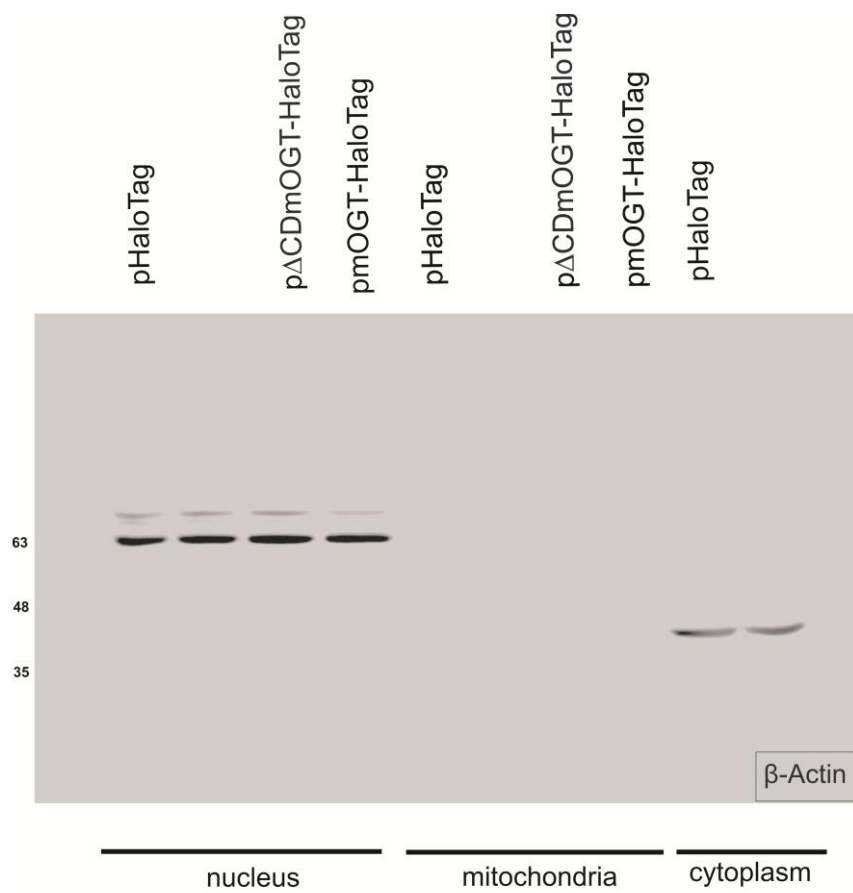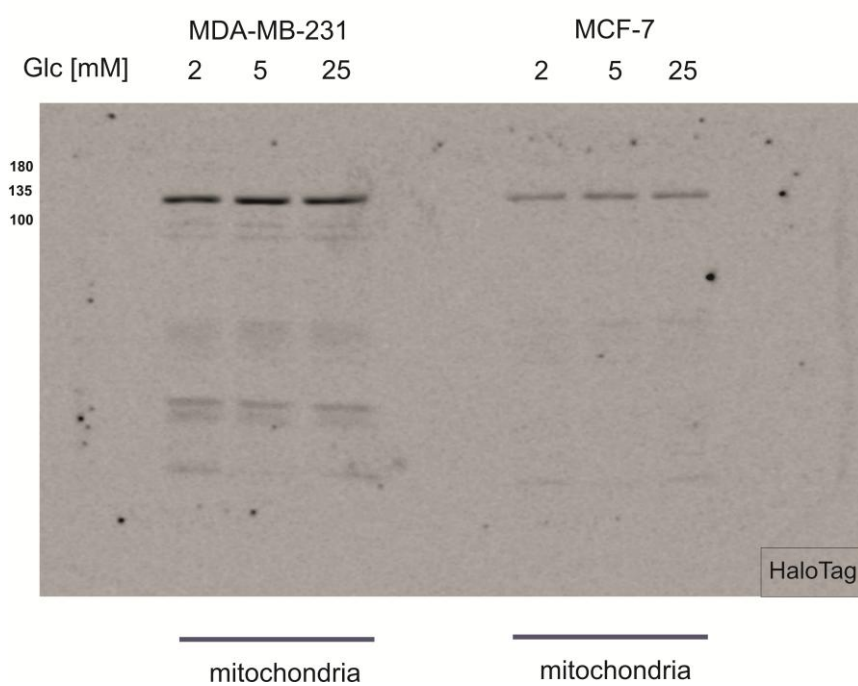

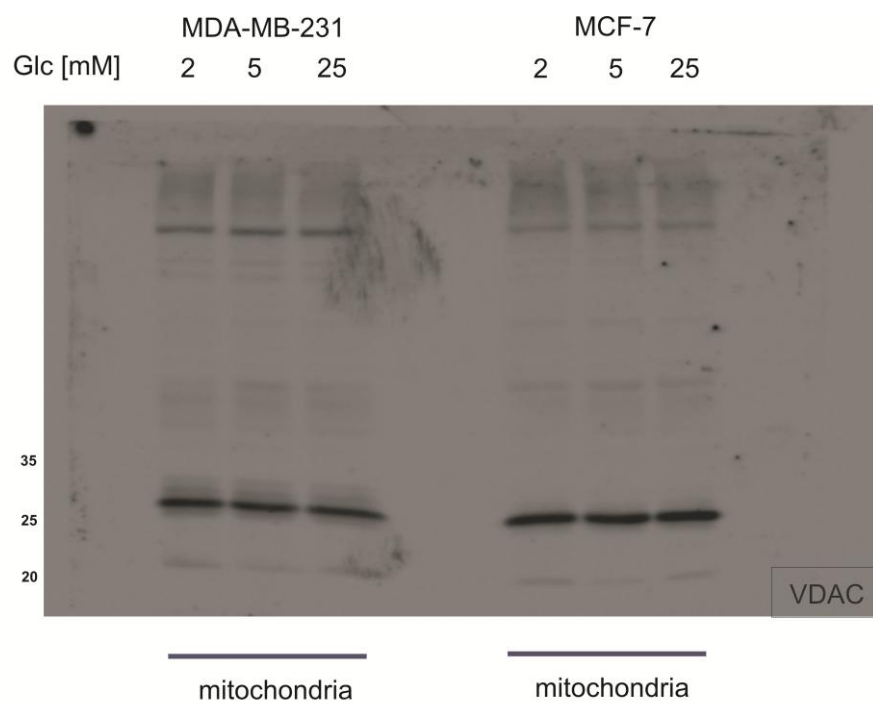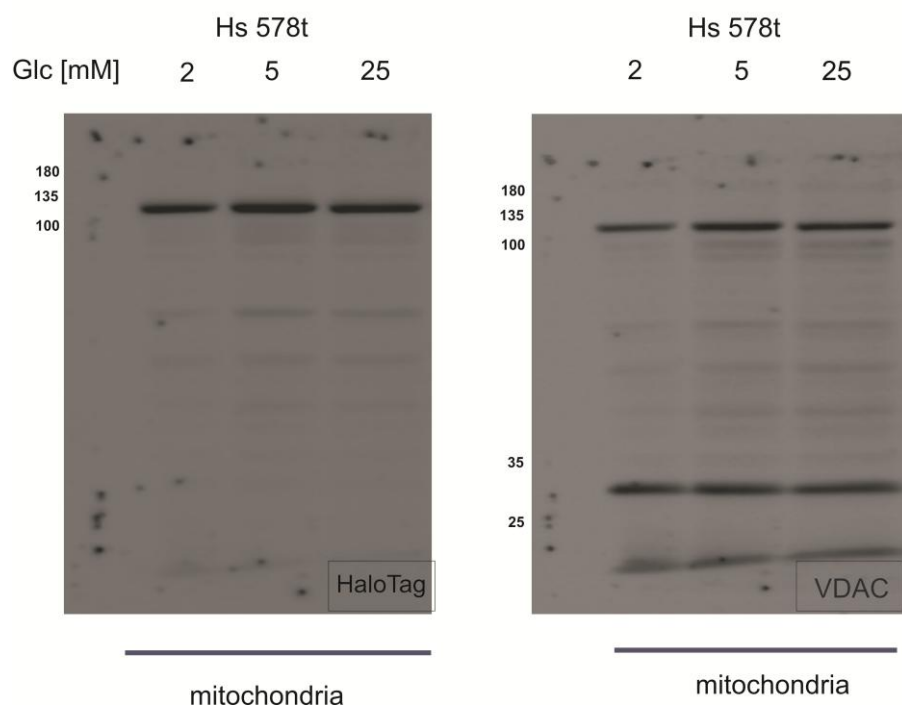



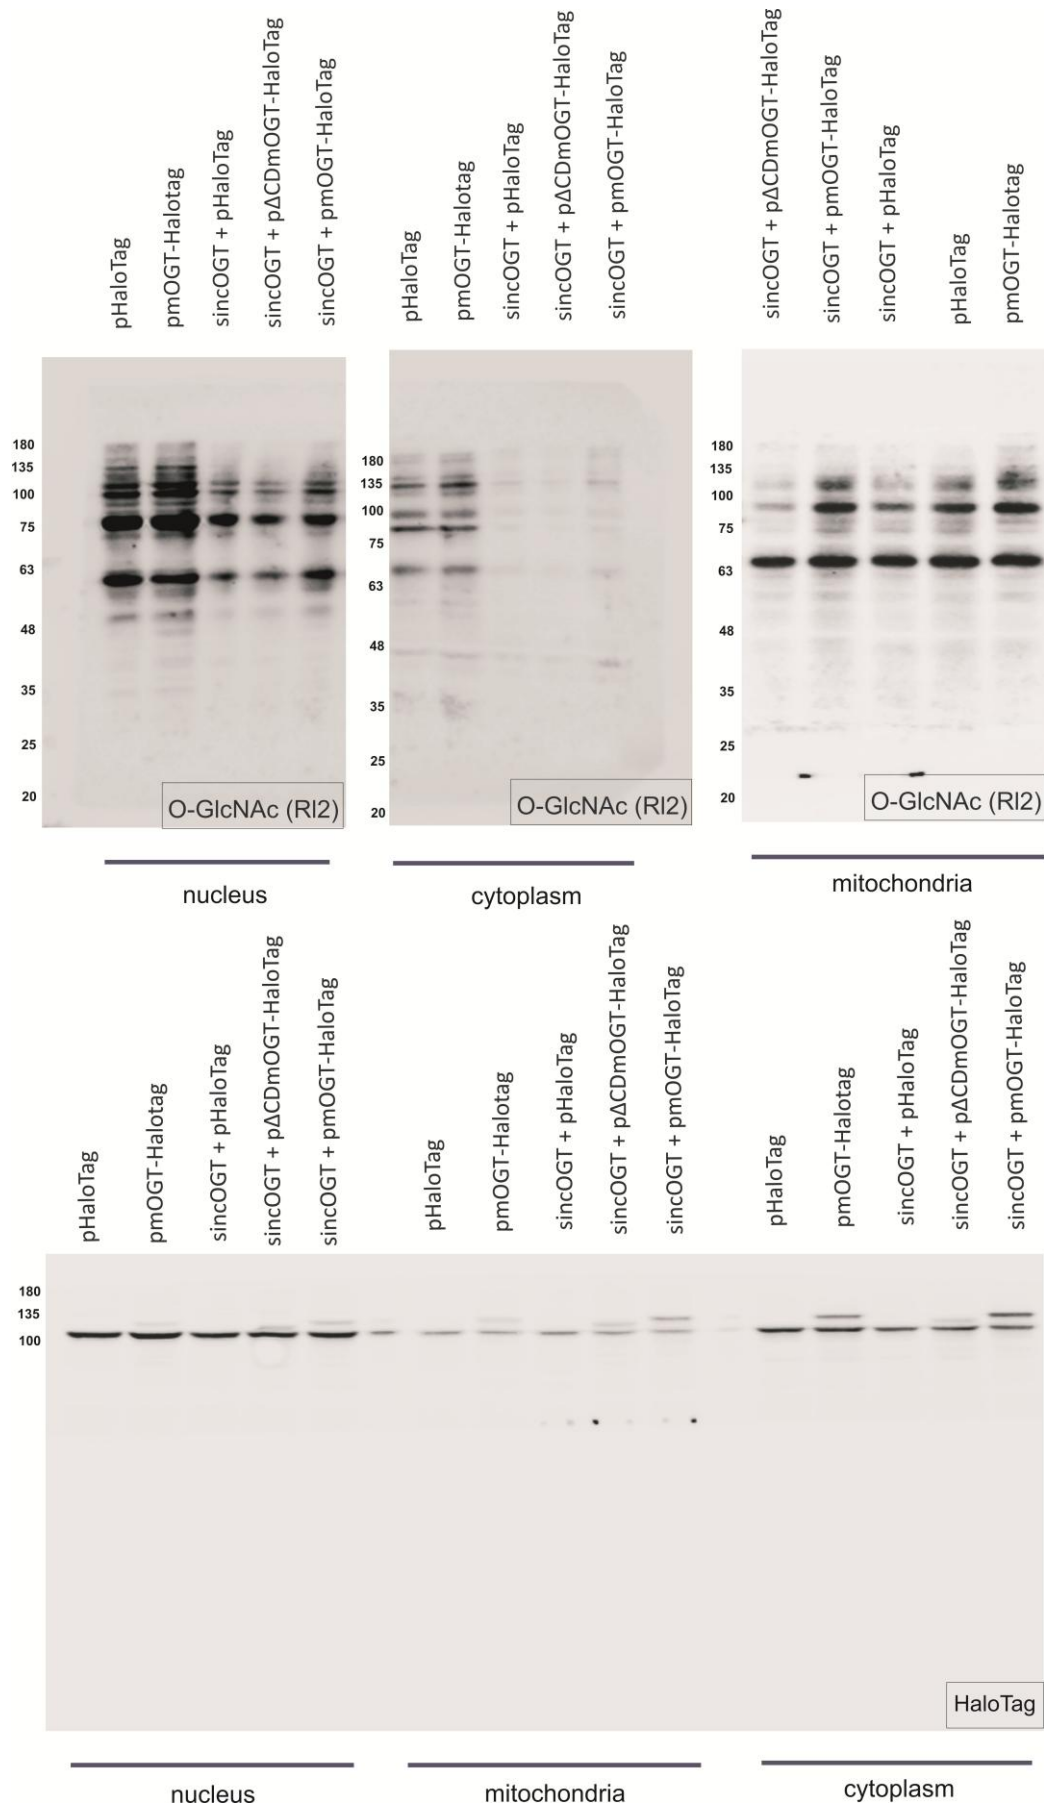

MCF-7

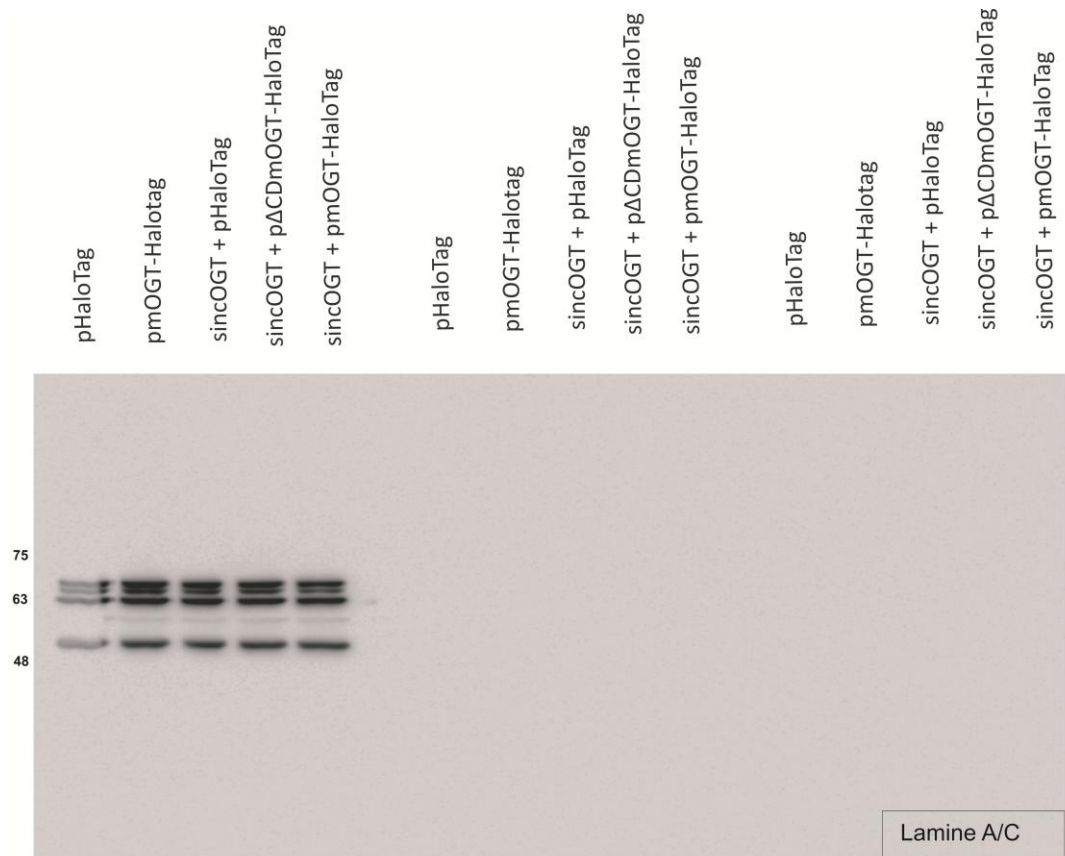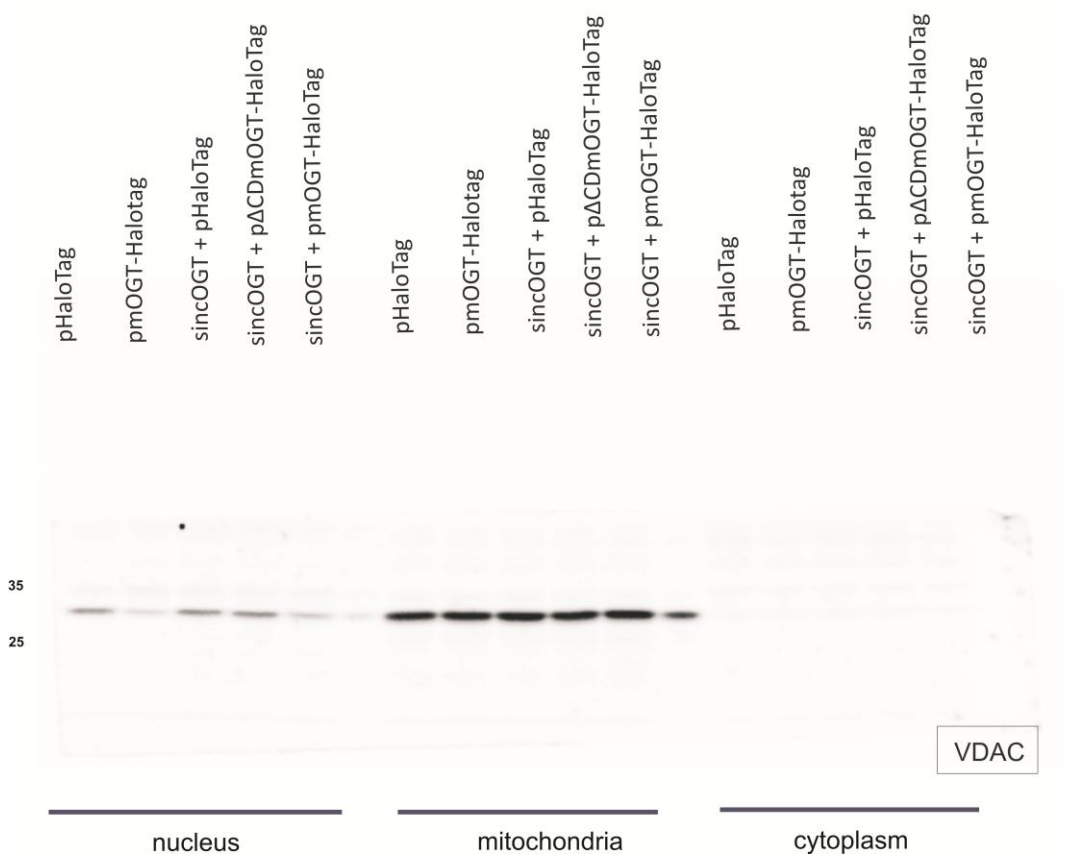

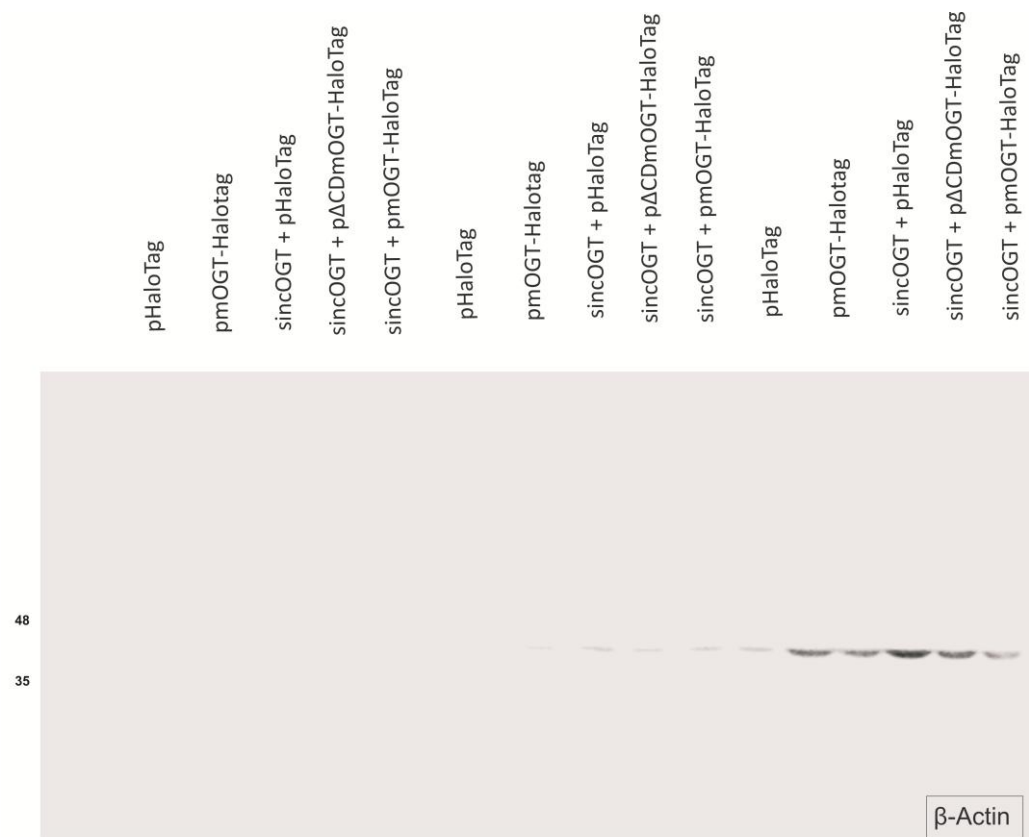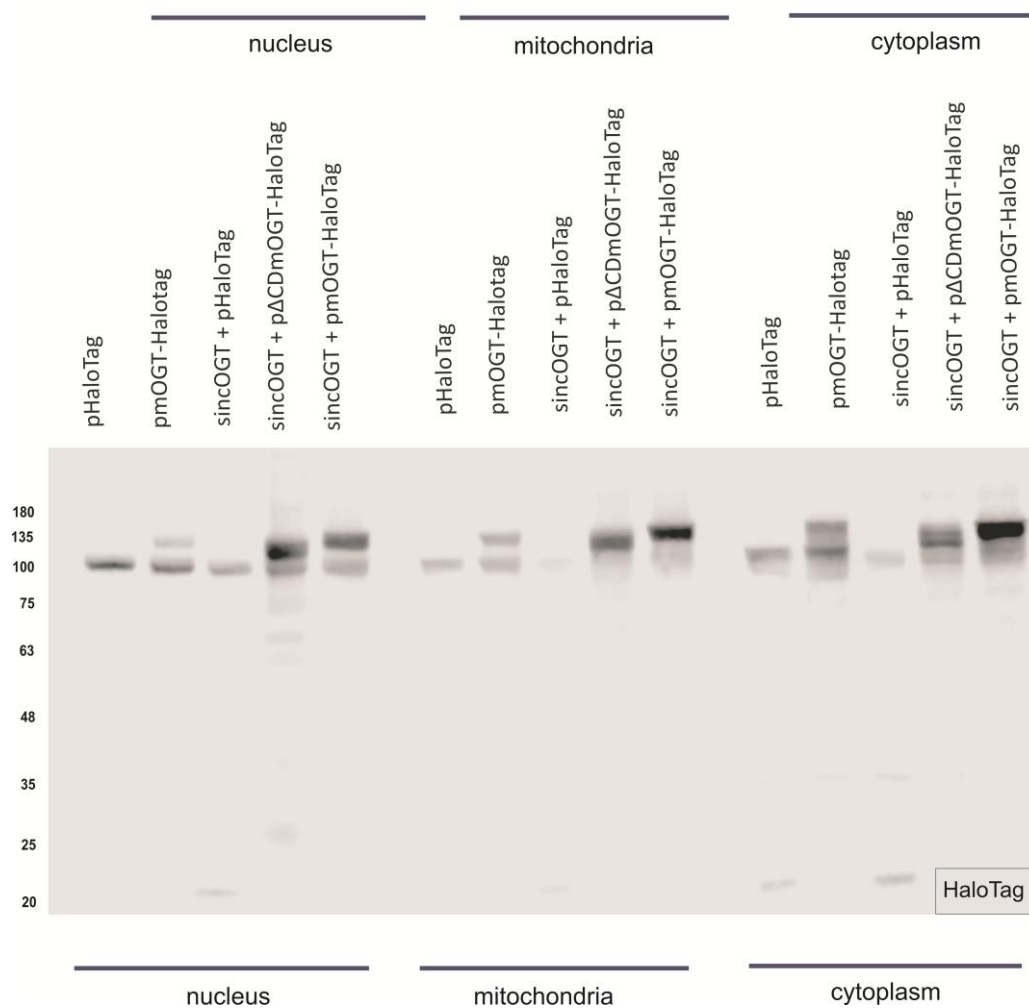

MDA-MB-231

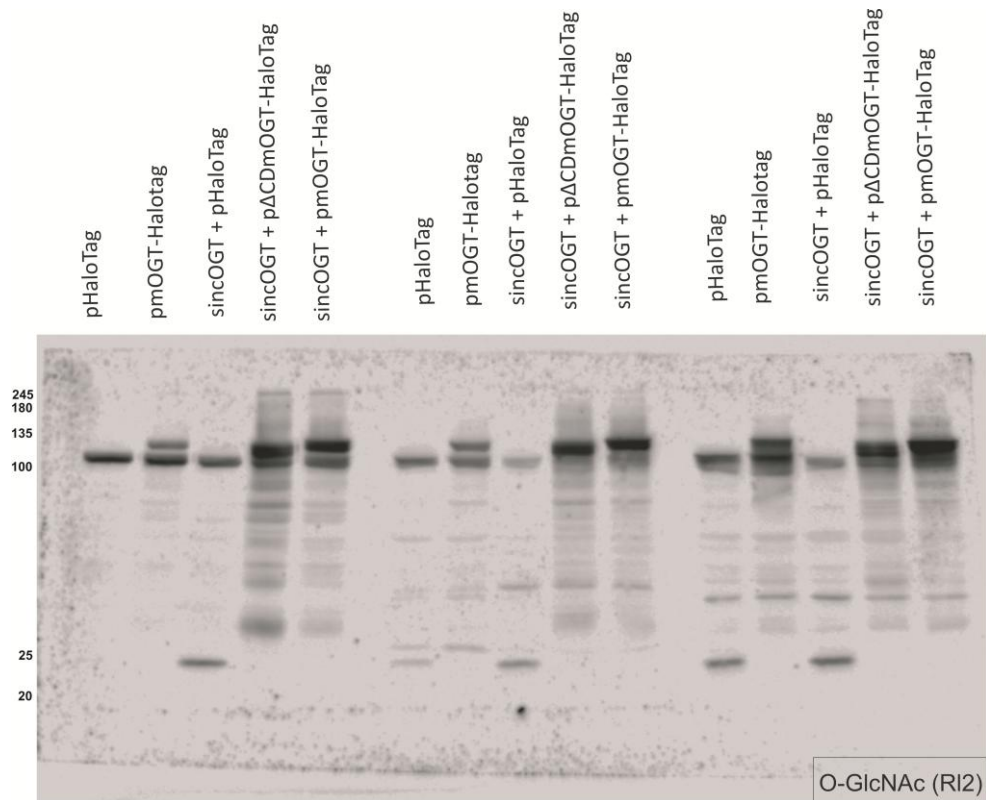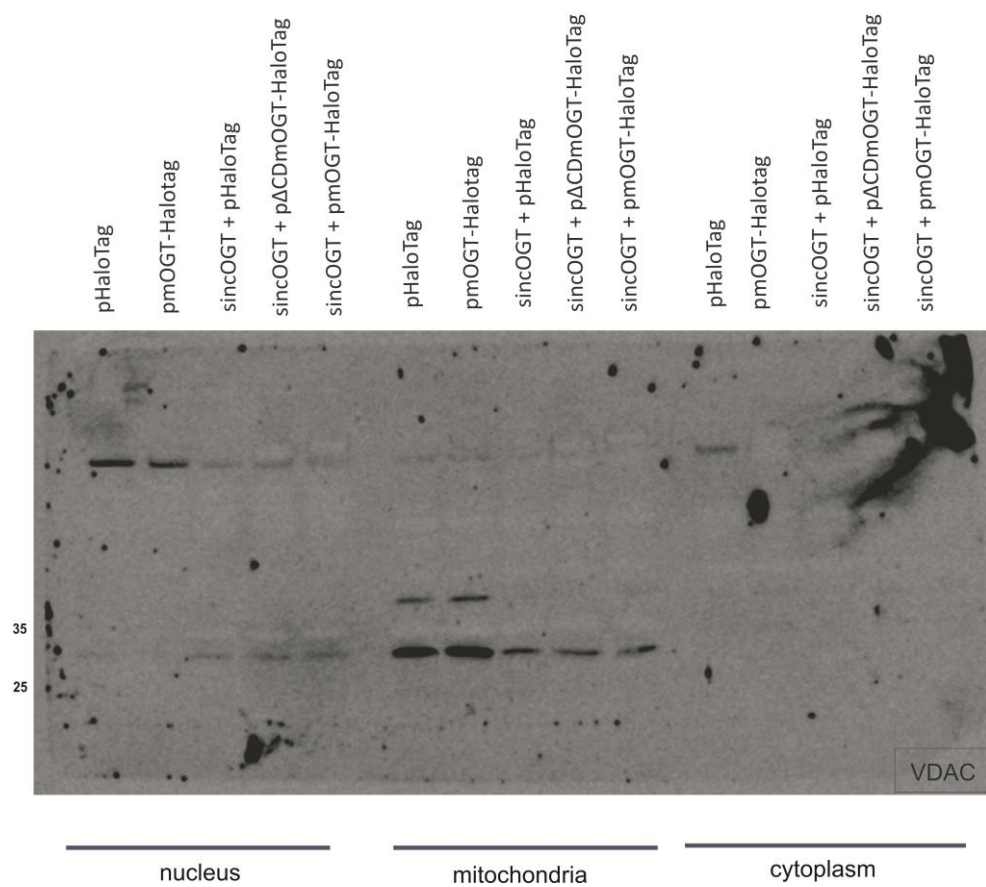

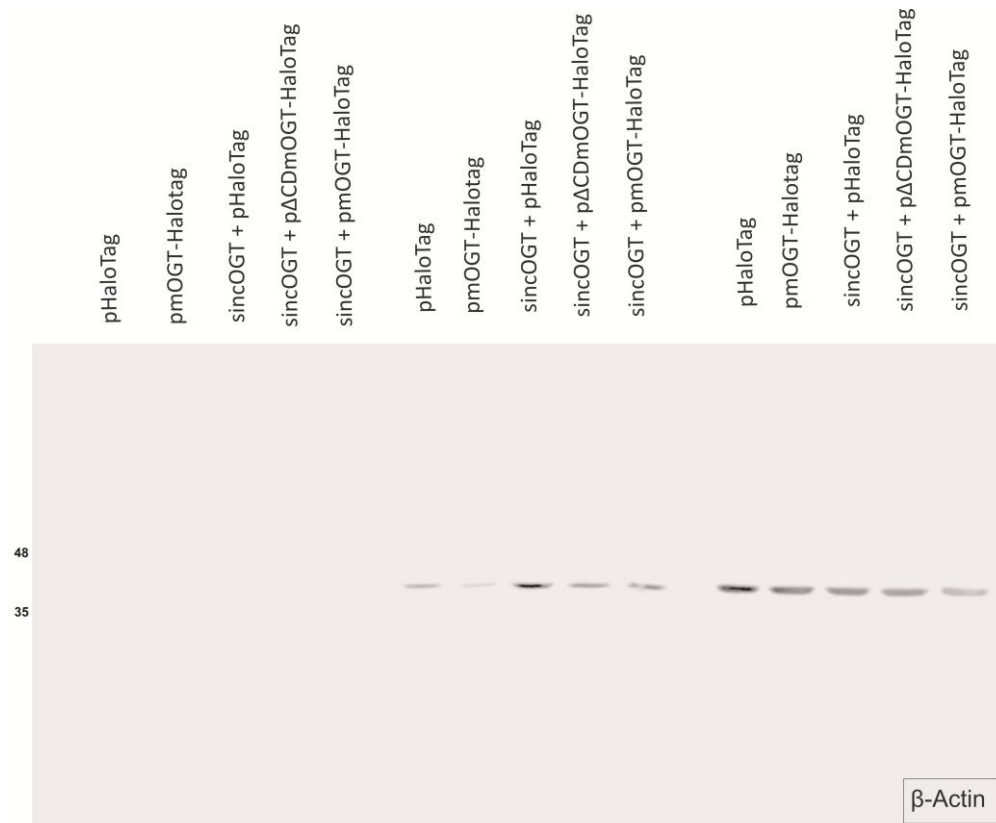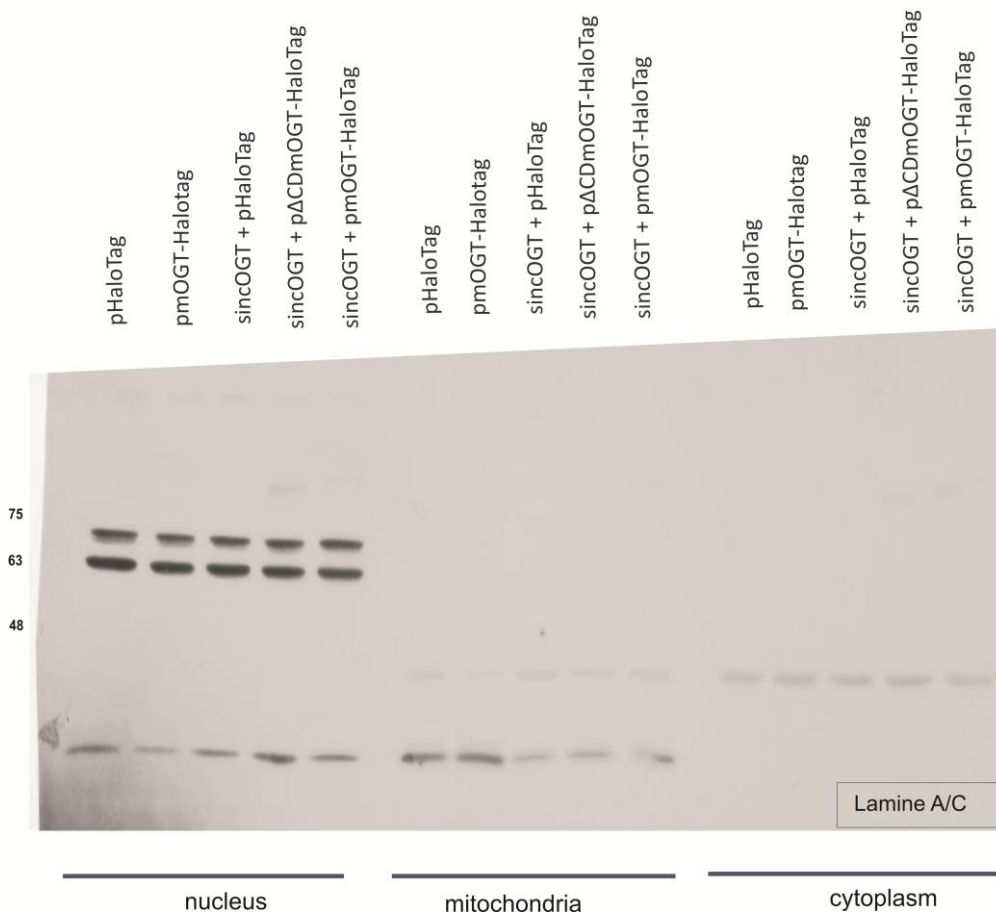

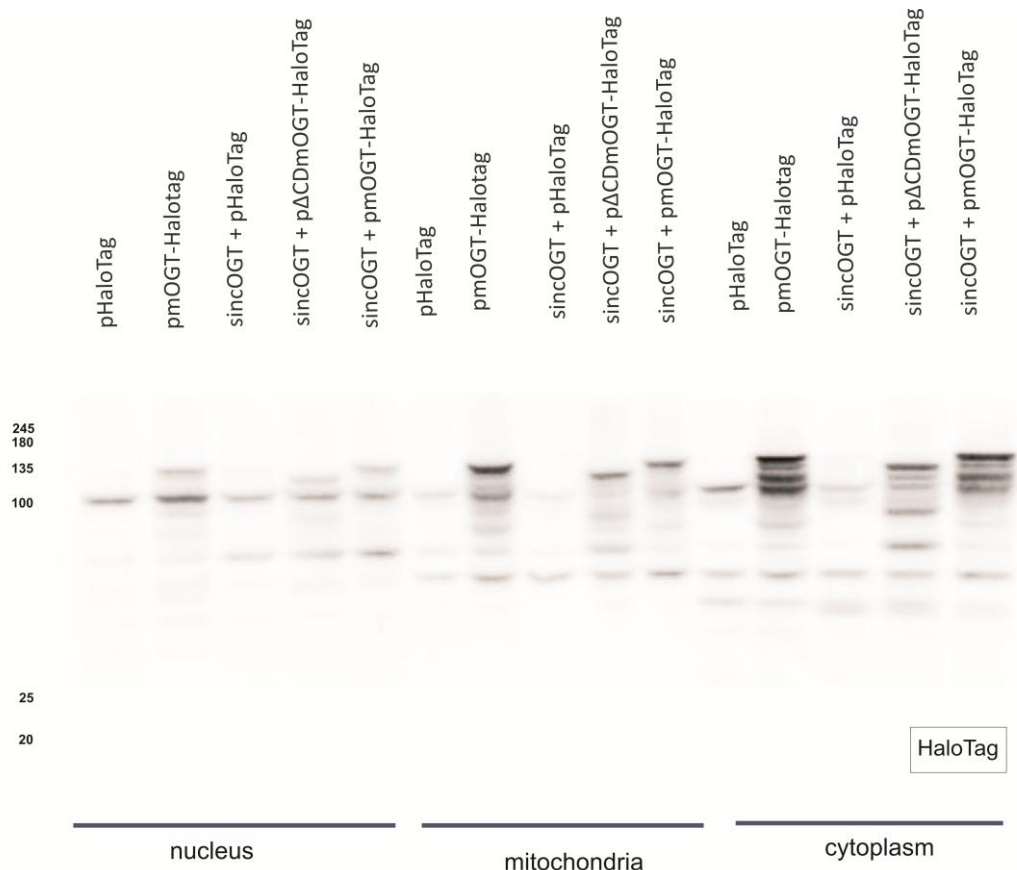

Hs 578t

HaloTag

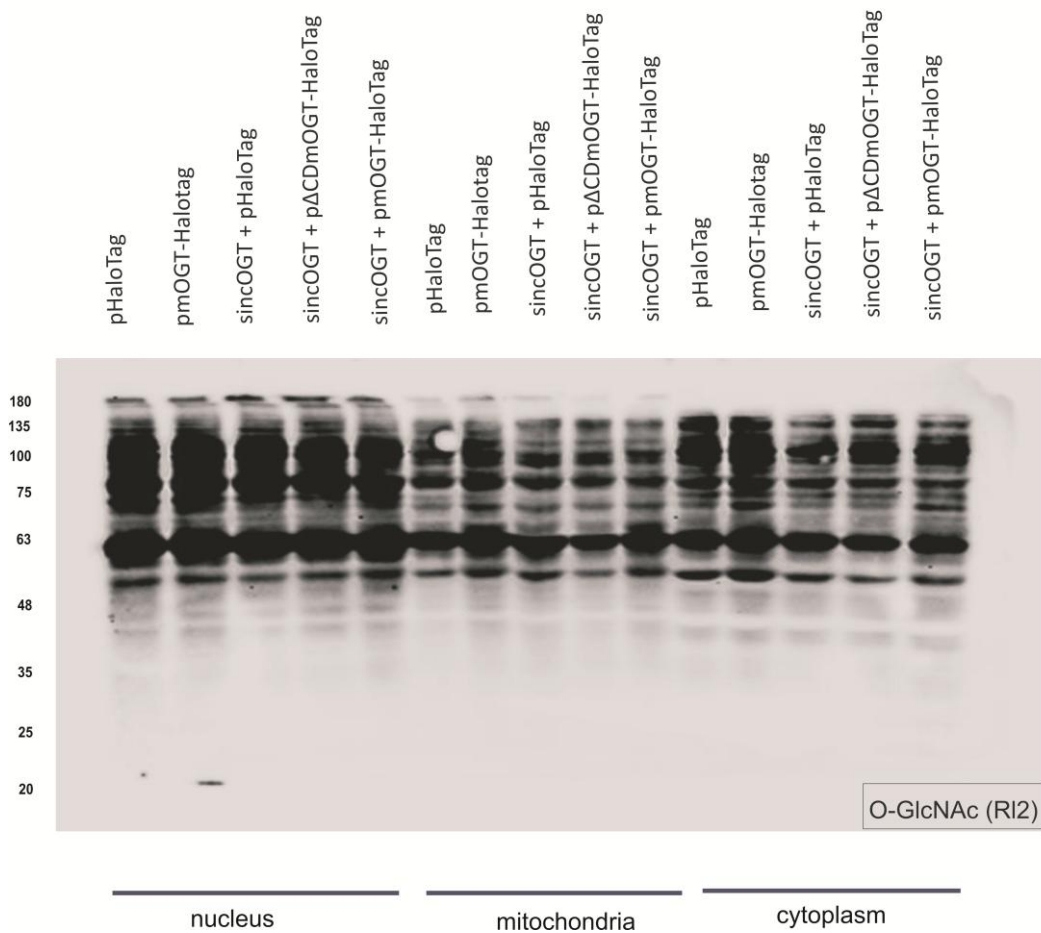

O-GlcNAc (RI2)

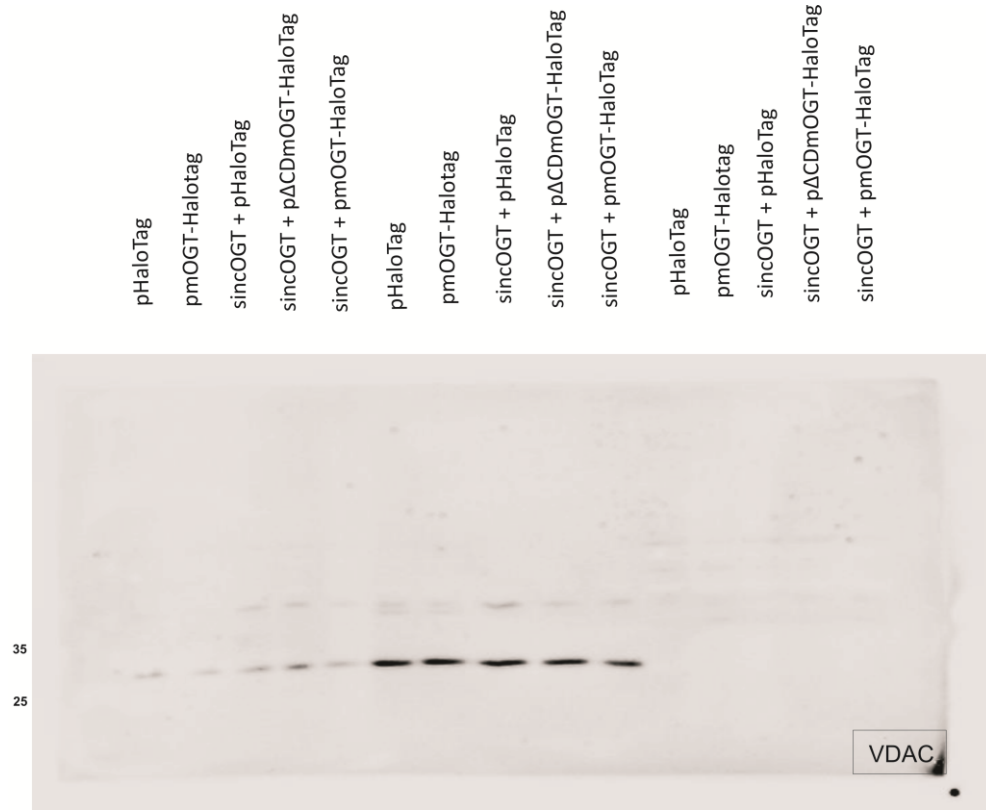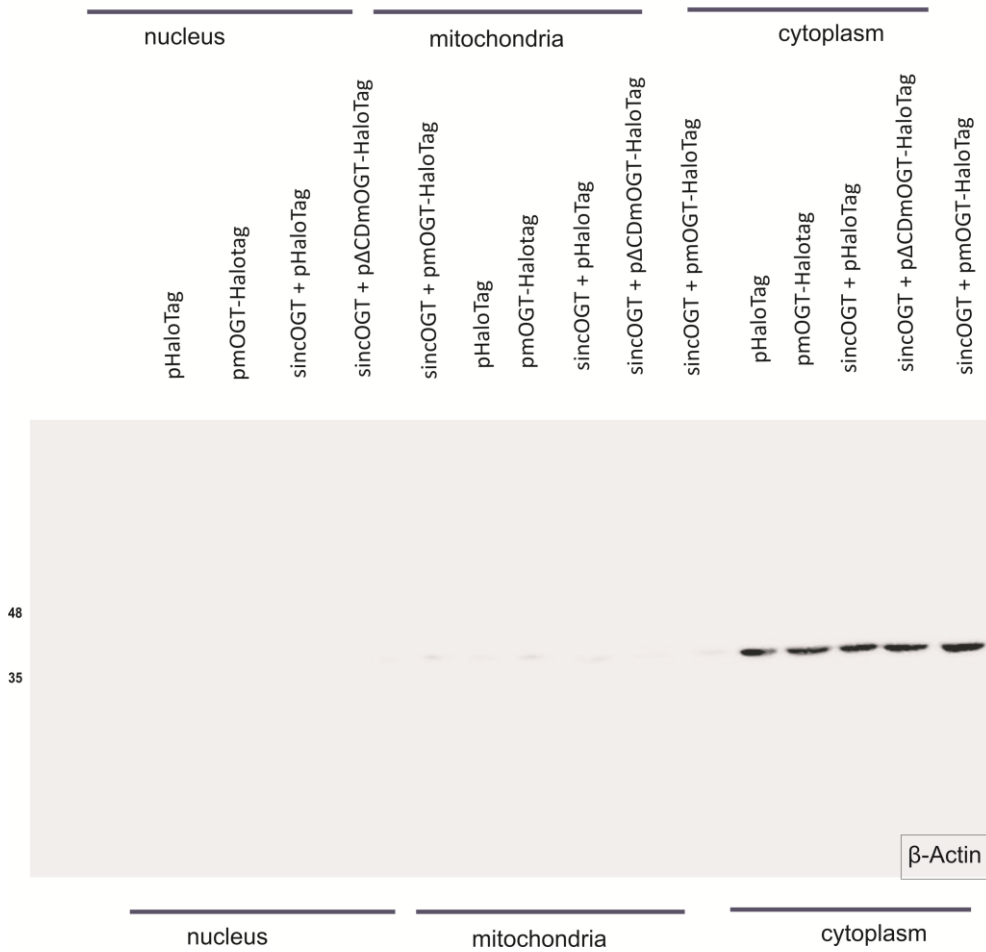



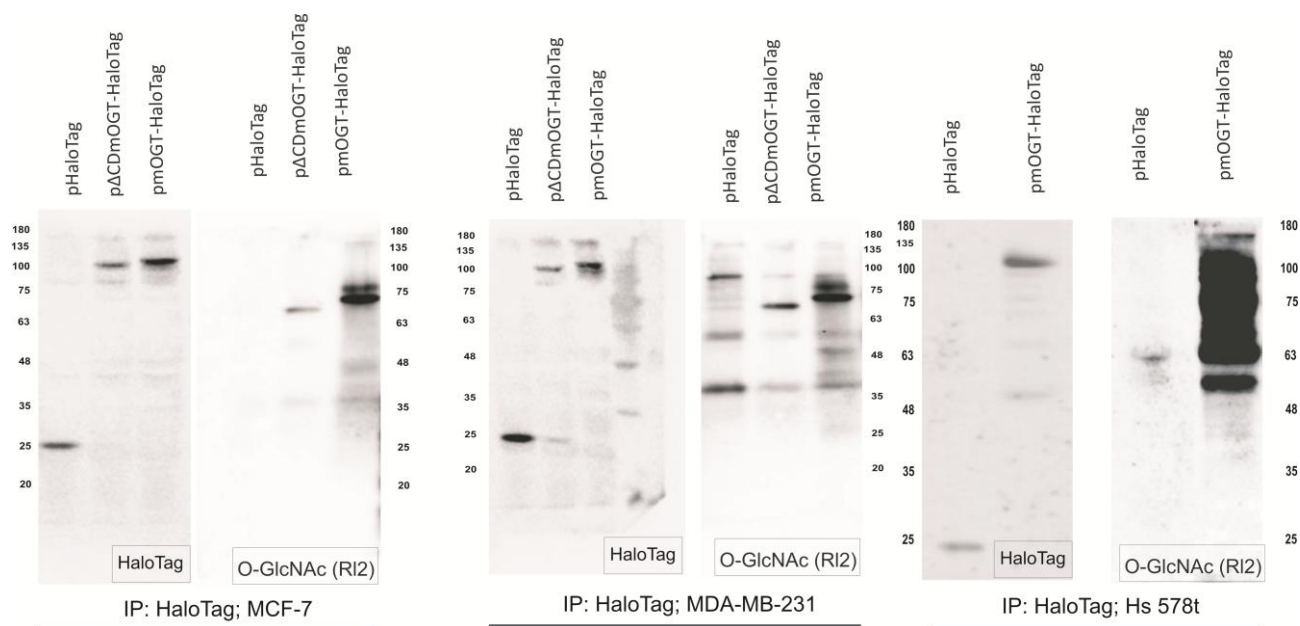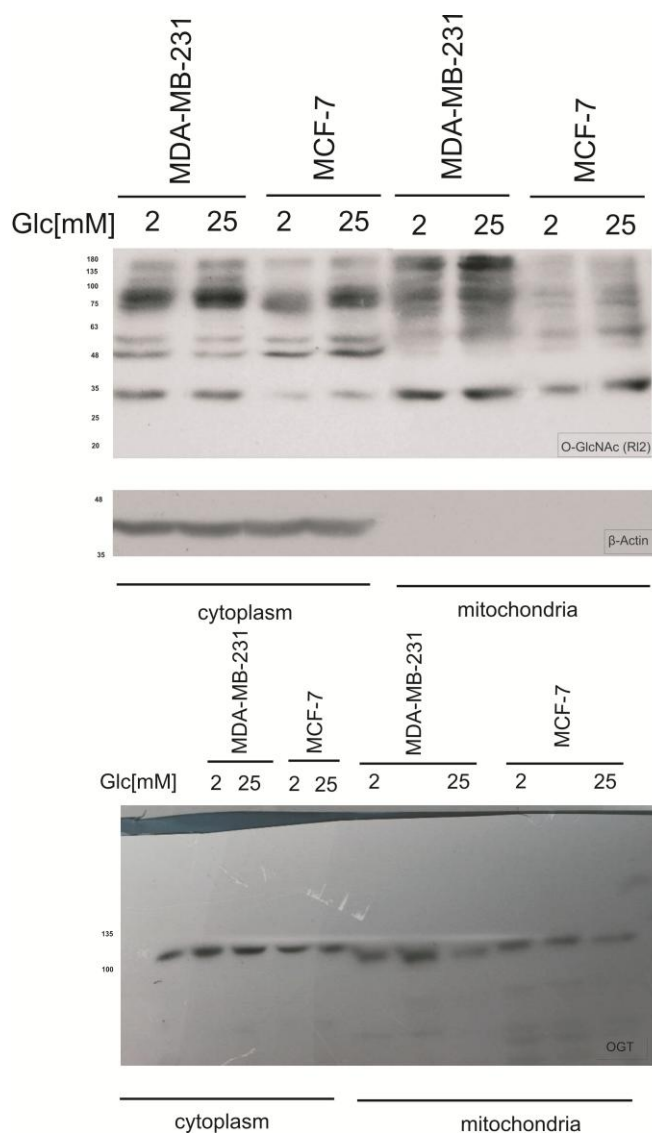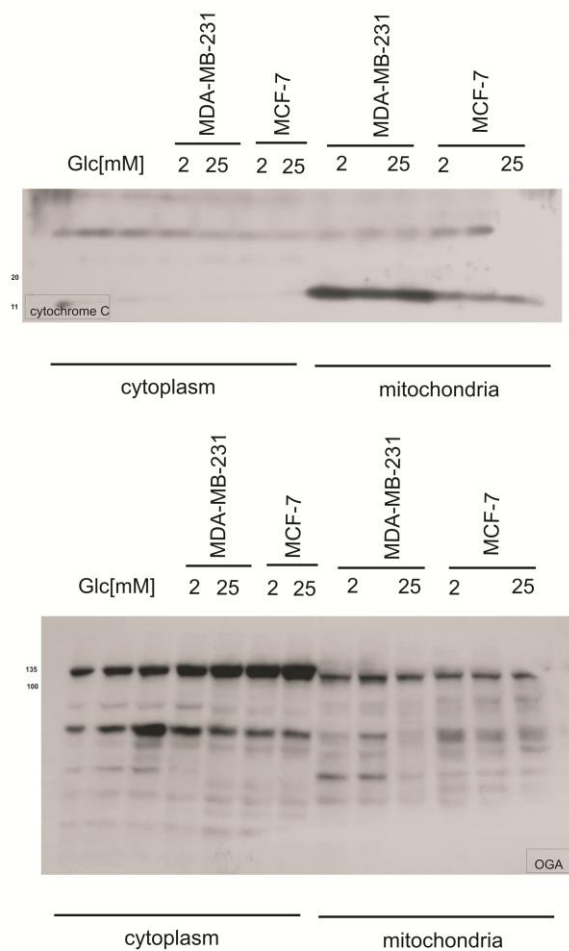



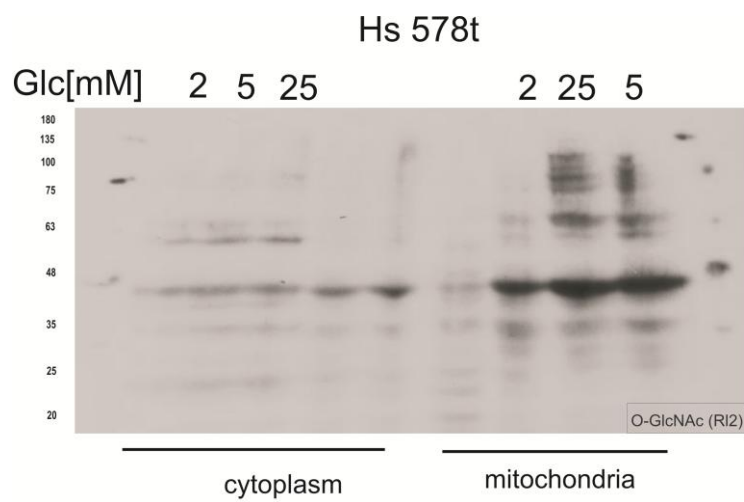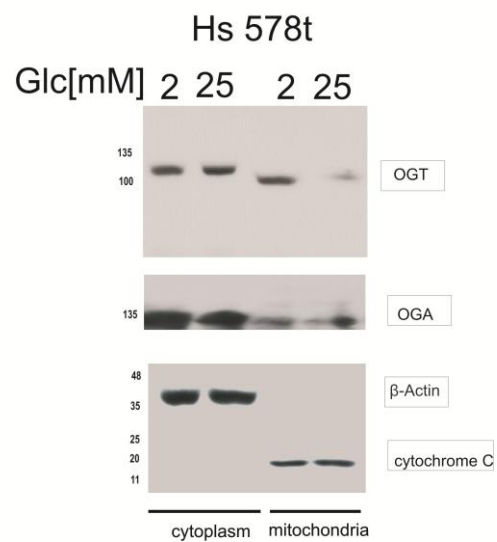

Supplement: s1 [file s1]
